# Supplementary material for: Conjugate addition of isocyanides to chromone 3-carboxylic acid: an efficient one-pot synthesis of chroman-4-one 2-carboxamides
Source: Royal Society of Chemistry journal article supplement (doi:10.1039/c2ob07011a), 2012-01-01

## SUPPORTING INFORMATION FOR

### One-pot synthesis of chroman-4-one-2-carboxamides

Ana G. Neo,<sup>†</sup> Jesús Díaz,<sup>†</sup> Stefano Marcaccini<sup>‡</sup> and Carlos F. Marcos<sup>†\*</sup>.

<sup>†</sup> *Laboratorio de Química Orgánica y Bioorgánica (L.O.B.O.). Dept. Química Orgánica e Inorgánica. Facultad de Veterinaria. Universidad de Extremadura. 10071 Cáceres, Spain.*

<sup>‡</sup> *HeteroBioLab. Dipartimento di Chimica Organica, Università di Firenze. 50019 Sesto Fiorentino (FI), Italy.*

#### TABLE OF CONTENTS

##### Spectra

|                                           |     |
|-------------------------------------------|-----|
| <sup>1</sup> H-NMR of compound <b>7a</b>  | S4  |
| <sup>13</sup> C-NMR of compound <b>7a</b> | S8  |
| <sup>1</sup> H-NMR of compound <b>7b</b>  | S9  |
| <sup>13</sup> C-NMR of compound <b>7b</b> | S10 |
| <sup>1</sup> H-NMR of compound <b>7c</b>  | S11 |
| <sup>13</sup> C-NMR of compound <b>7c</b> | S15 |
| <sup>1</sup> H-NMR of compound <b>7d</b>  | S16 |
| <sup>13</sup> C-NMR of compound <b>7d</b> | S18 |
| <sup>1</sup> H-NMR of compound <b>7e</b>  | S19 |
| <sup>13</sup> C-NMR of compound <b>7e</b> | S21 |
| <sup>1</sup> H-NMR of compound <b>7f</b>  | S22 |

|                                           |     |
|-------------------------------------------|-----|
| <sup>13</sup> C-NMR of compound <b>7f</b> | S23 |
| <sup>1</sup> H-NMR of compound <b>7g</b>  | S24 |
| <sup>13</sup> C-NMR of compound <b>7g</b> | S27 |
| <sup>1</sup> H-NMR of compound <b>7h</b>  | S28 |
| <sup>13</sup> C-NMR of compound <b>7h</b> | S30 |
| <sup>1</sup> H-NMR of compound <b>7i</b>  | S31 |
| <sup>13</sup> C-NMR of compound <b>7i</b> | S32 |
| <sup>1</sup> H-NMR of compound <b>8a</b>  | S33 |
| <sup>13</sup> C-NMR of compound <b>8a</b> | S34 |
| <sup>1</sup> H-NMR of compound <b>8b</b>  | S35 |
| <sup>13</sup> C-NMR of compound <b>8b</b> | S36 |
| <sup>1</sup> H-NMR of compound <b>8c</b>  | S37 |
| <sup>13</sup> C-NMR of compound <b>8c</b> | S38 |
| <sup>1</sup> H-NMR of compound <b>8d</b>  | S39 |
| <sup>13</sup> C-NMR of compound <b>8d</b> | S40 |
| <sup>1</sup> H-NMR of compound <b>8e</b>  | S41 |
| <sup>13</sup> C-NMR of compound <b>8e</b> | S42 |
| <sup>1</sup> H-NMR of compound <b>8f</b>  | S43 |
| <sup>13</sup> C-NMR of compound <b>8f</b> | S44 |
| <sup>1</sup> H-NMR of compound <b>9a</b>  | S45 |
| <sup>13</sup> C-NMR of compound <b>9a</b> | S46 |
| <sup>1</sup> H-NMR of compound <b>9b</b>  | S47 |

|                                                                                                                                                                                                                                                                                                |     |
|------------------------------------------------------------------------------------------------------------------------------------------------------------------------------------------------------------------------------------------------------------------------------------------------|-----|
| <sup>13</sup> C-NMR of compound <b>9b</b>                                                                                                                                                                                                                                                      | S48 |
| <sup>1</sup> H-NMR of compound <b>10</b>                                                                                                                                                                                                                                                       | S49 |
| <sup>13</sup> C-NMR of compound <b>10</b>                                                                                                                                                                                                                                                      | S50 |
| <sup>1</sup> H-NMR of compound <b>11</b>                                                                                                                                                                                                                                                       | S51 |
| <sup>13</sup> C-NMR of compound <b>11</b>                                                                                                                                                                                                                                                      | S52 |
| <sup>1</sup> H-NMR of 2-(2-methoxyethoxy)ethyl methanesulfonate                                                                                                                                                                                                                                | S53 |
| <sup>13</sup> C-NMR of 2-(2-methoxyethoxy)ethyl methanesulfonate                                                                                                                                                                                                                               | S54 |
| <sup>1</sup> H-NMR of 2-(2-methoxyethoxy)ethanamine                                                                                                                                                                                                                                            | S55 |
| <sup>1</sup> H-NMR of 1-(2-Methoxyethoxy)-2-isocyanoethane                                                                                                                                                                                                                                     | S56 |
| <sup>13</sup> C-NMR of 1-(2-Methoxyethoxy)-2-isocyanoethane                                                                                                                                                                                                                                    | S57 |
| Computational details                                                                                                                                                                                                                                                                          | S58 |
| Table S1. Electronic energies and thermodynamical magnitudes of the critical structures involved in the reaction mechanisms found at the B3LYP/6-31G(d) theory level                                                                                                                           | S59 |
| Table S2. Relative electronic energy ( $\Delta E$ ), enthalpy ( $\Delta H$ ), entropy contribution ( $T\Delta S$ ) and Gibbs free energy in gas phase ( $\Delta G_{gas}$ ), in kcal mol <sup>-1</sup> , of the critical structures located for the reaction at the B3LYP/6-31G(d) theory level | S60 |
| Table S3. Single-point energies on the B3LYP/Basis of the B3LYP/6-31G* optimized structures located for the reaction pathway at different levels of theory                                                                                                                                     | S61 |
| Table S4. Relative energies on the B3LYP/Basis for the reaction pathways at different levels of theory                                                                                                                                                                                         | S62 |
| B3LYP/6-31G(d) optimized cartesian coordinates of the critical structures located in the present work                                                                                                                                                                                          | S63 |
| Table S5. B3LYP/6-31G(d) optimized geometries of the species involved in the reaction mechanisms found for the reaction.                                                                                                                                                                       | S71 |

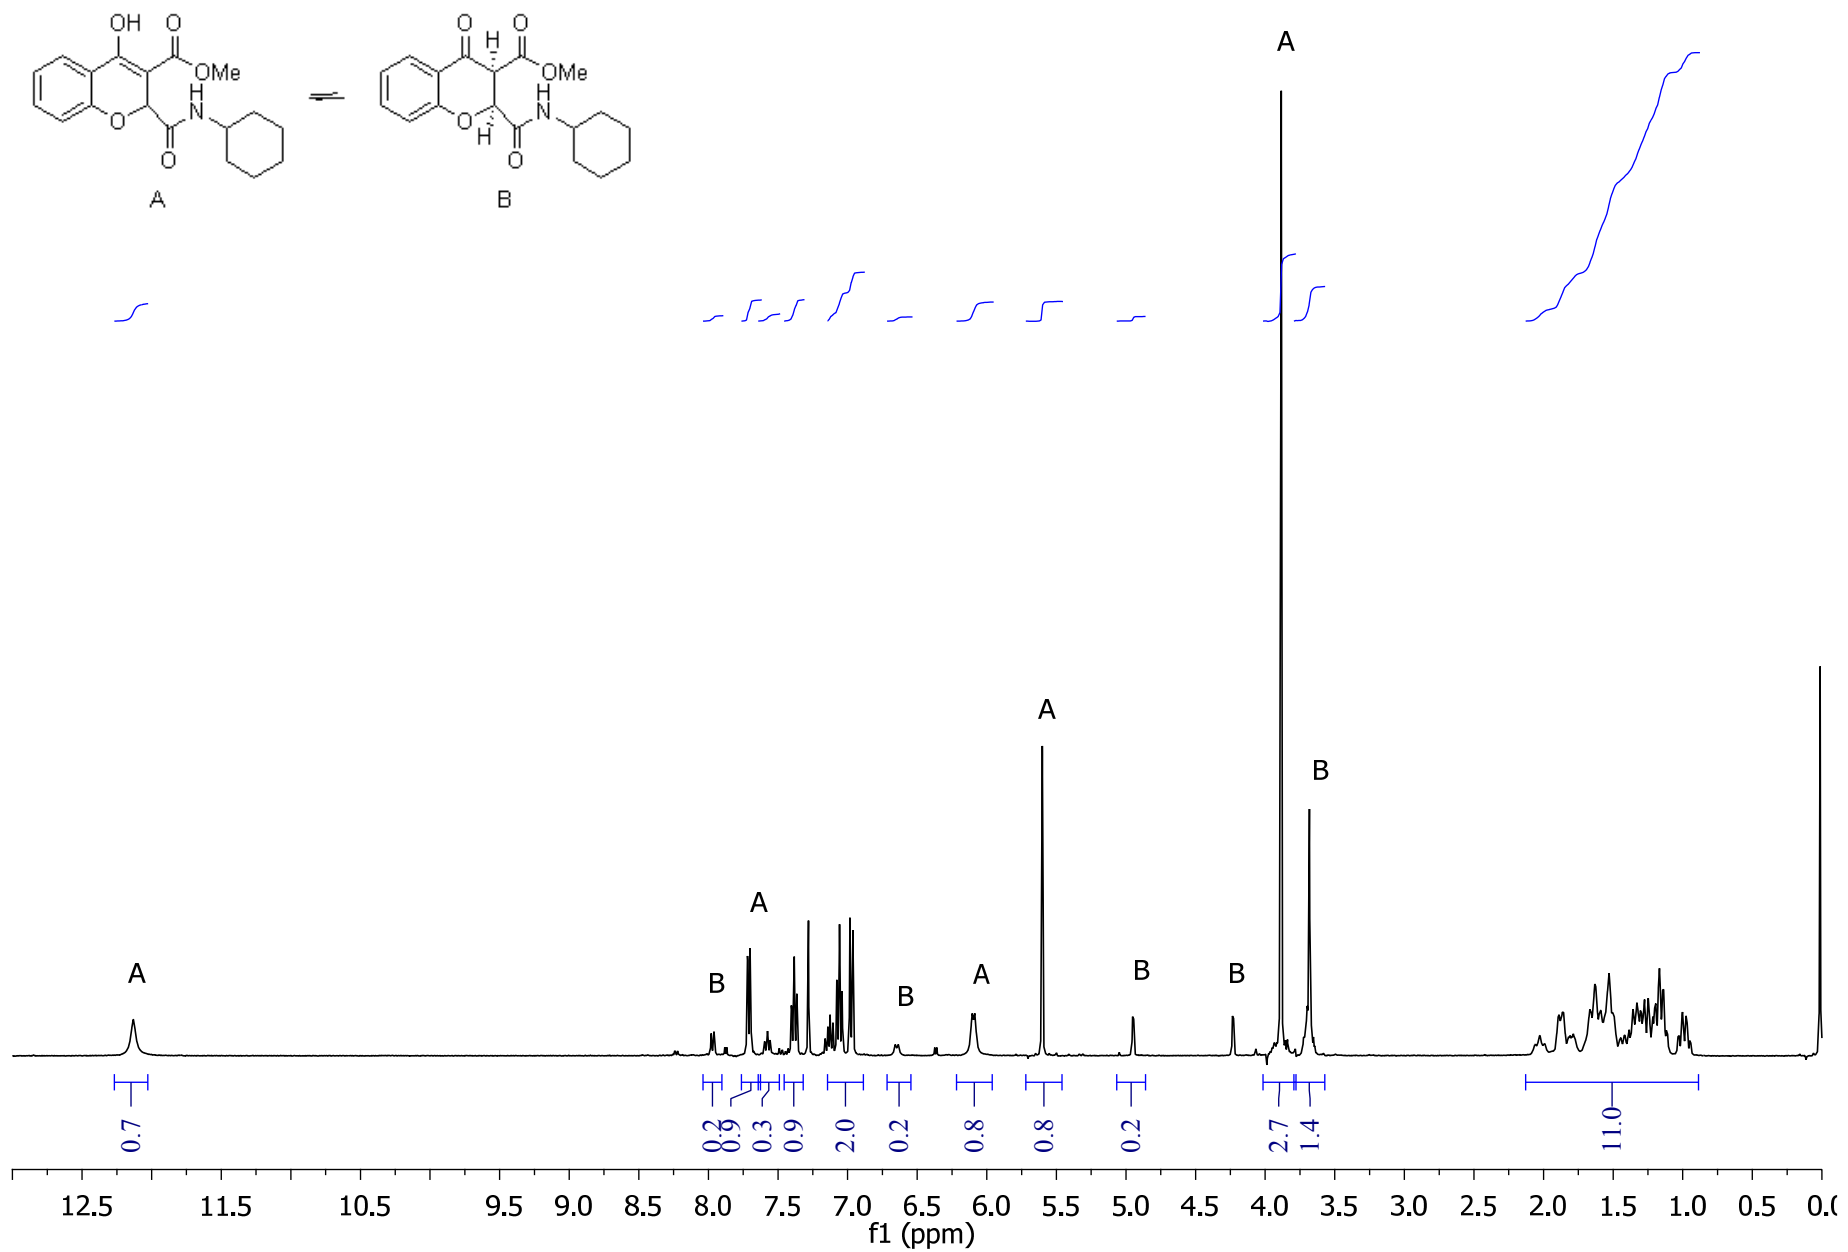

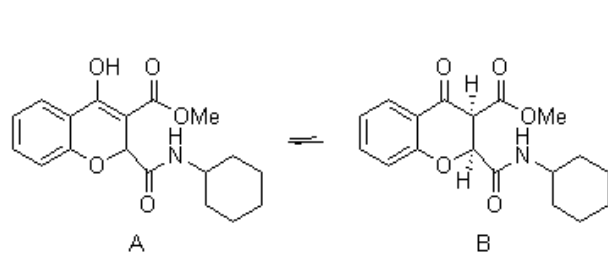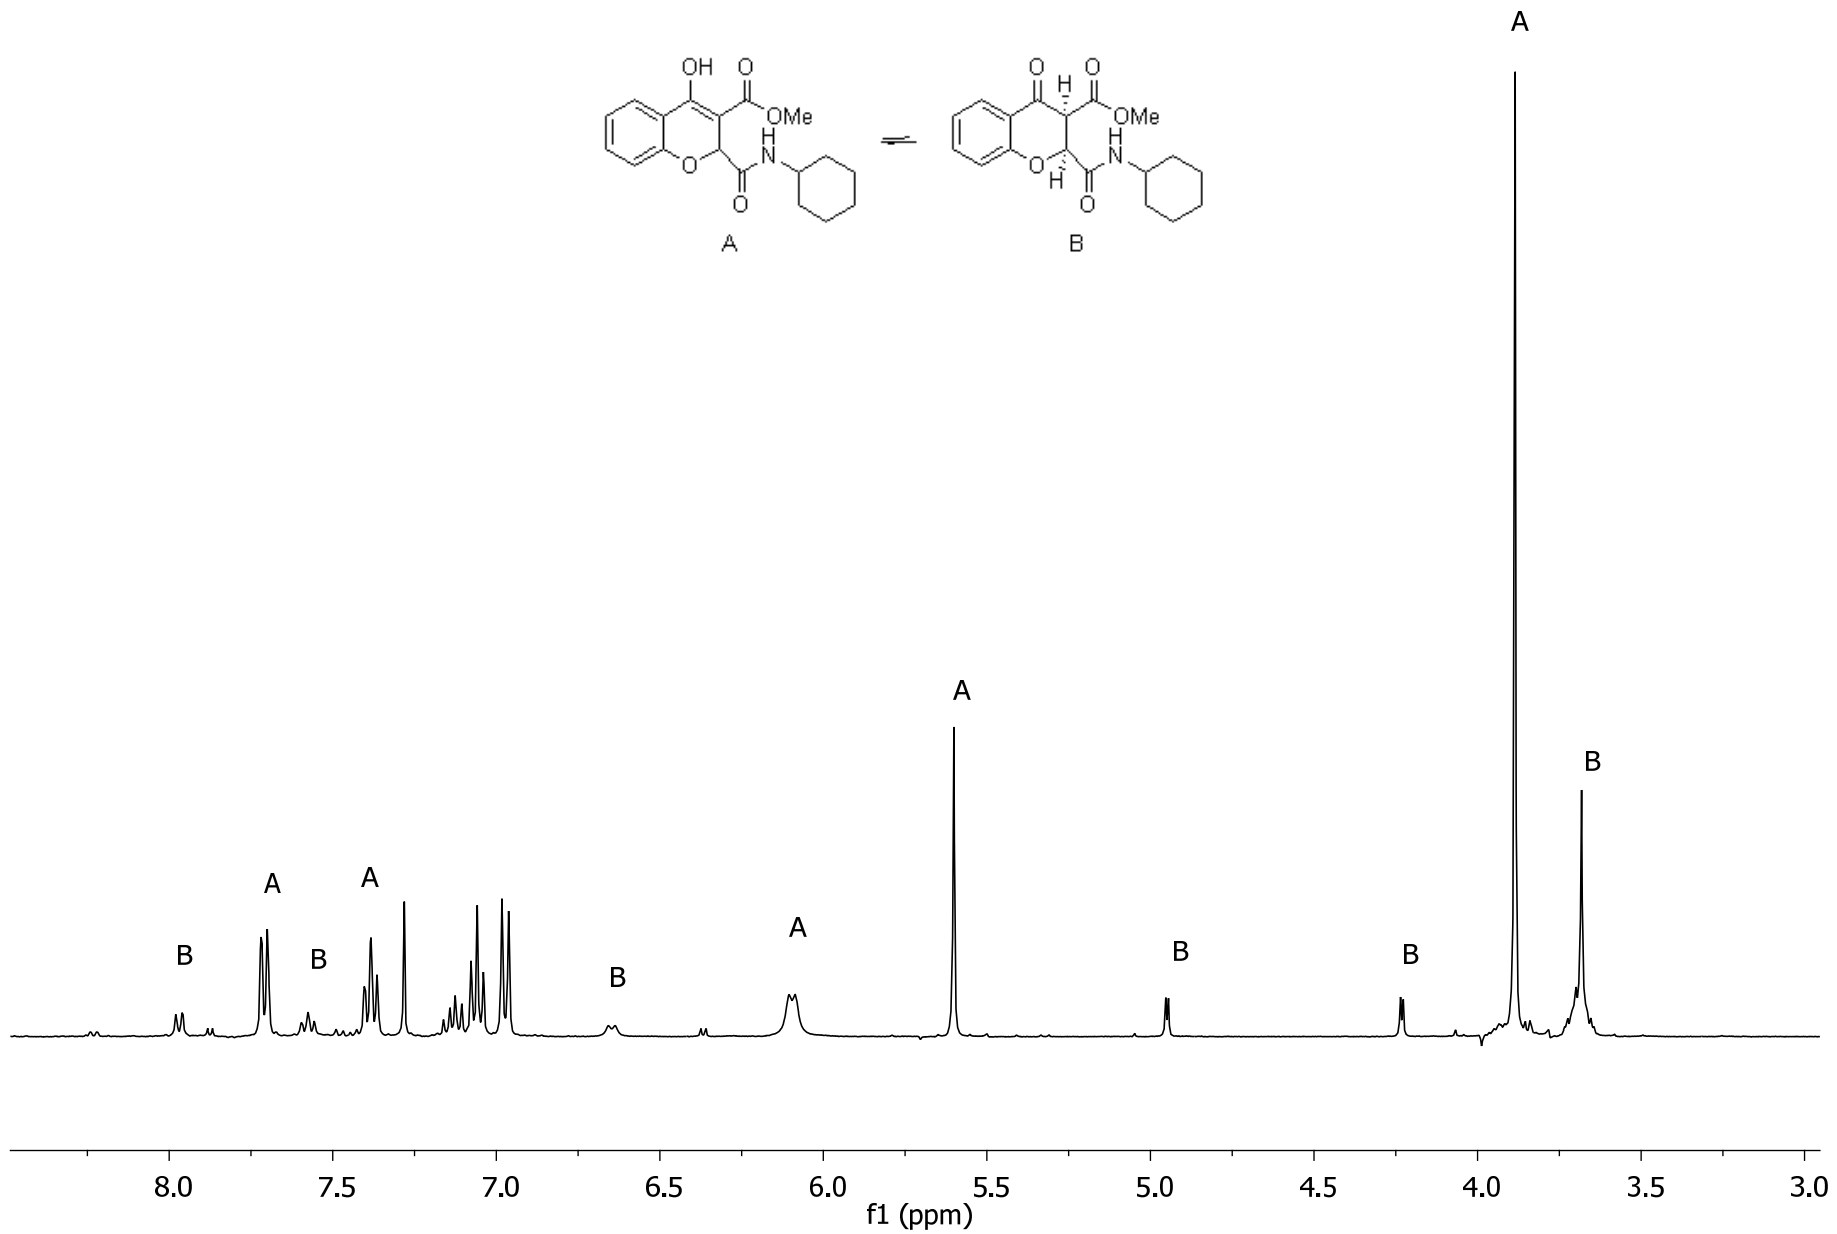

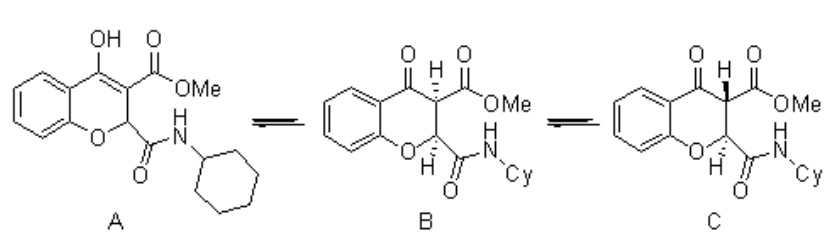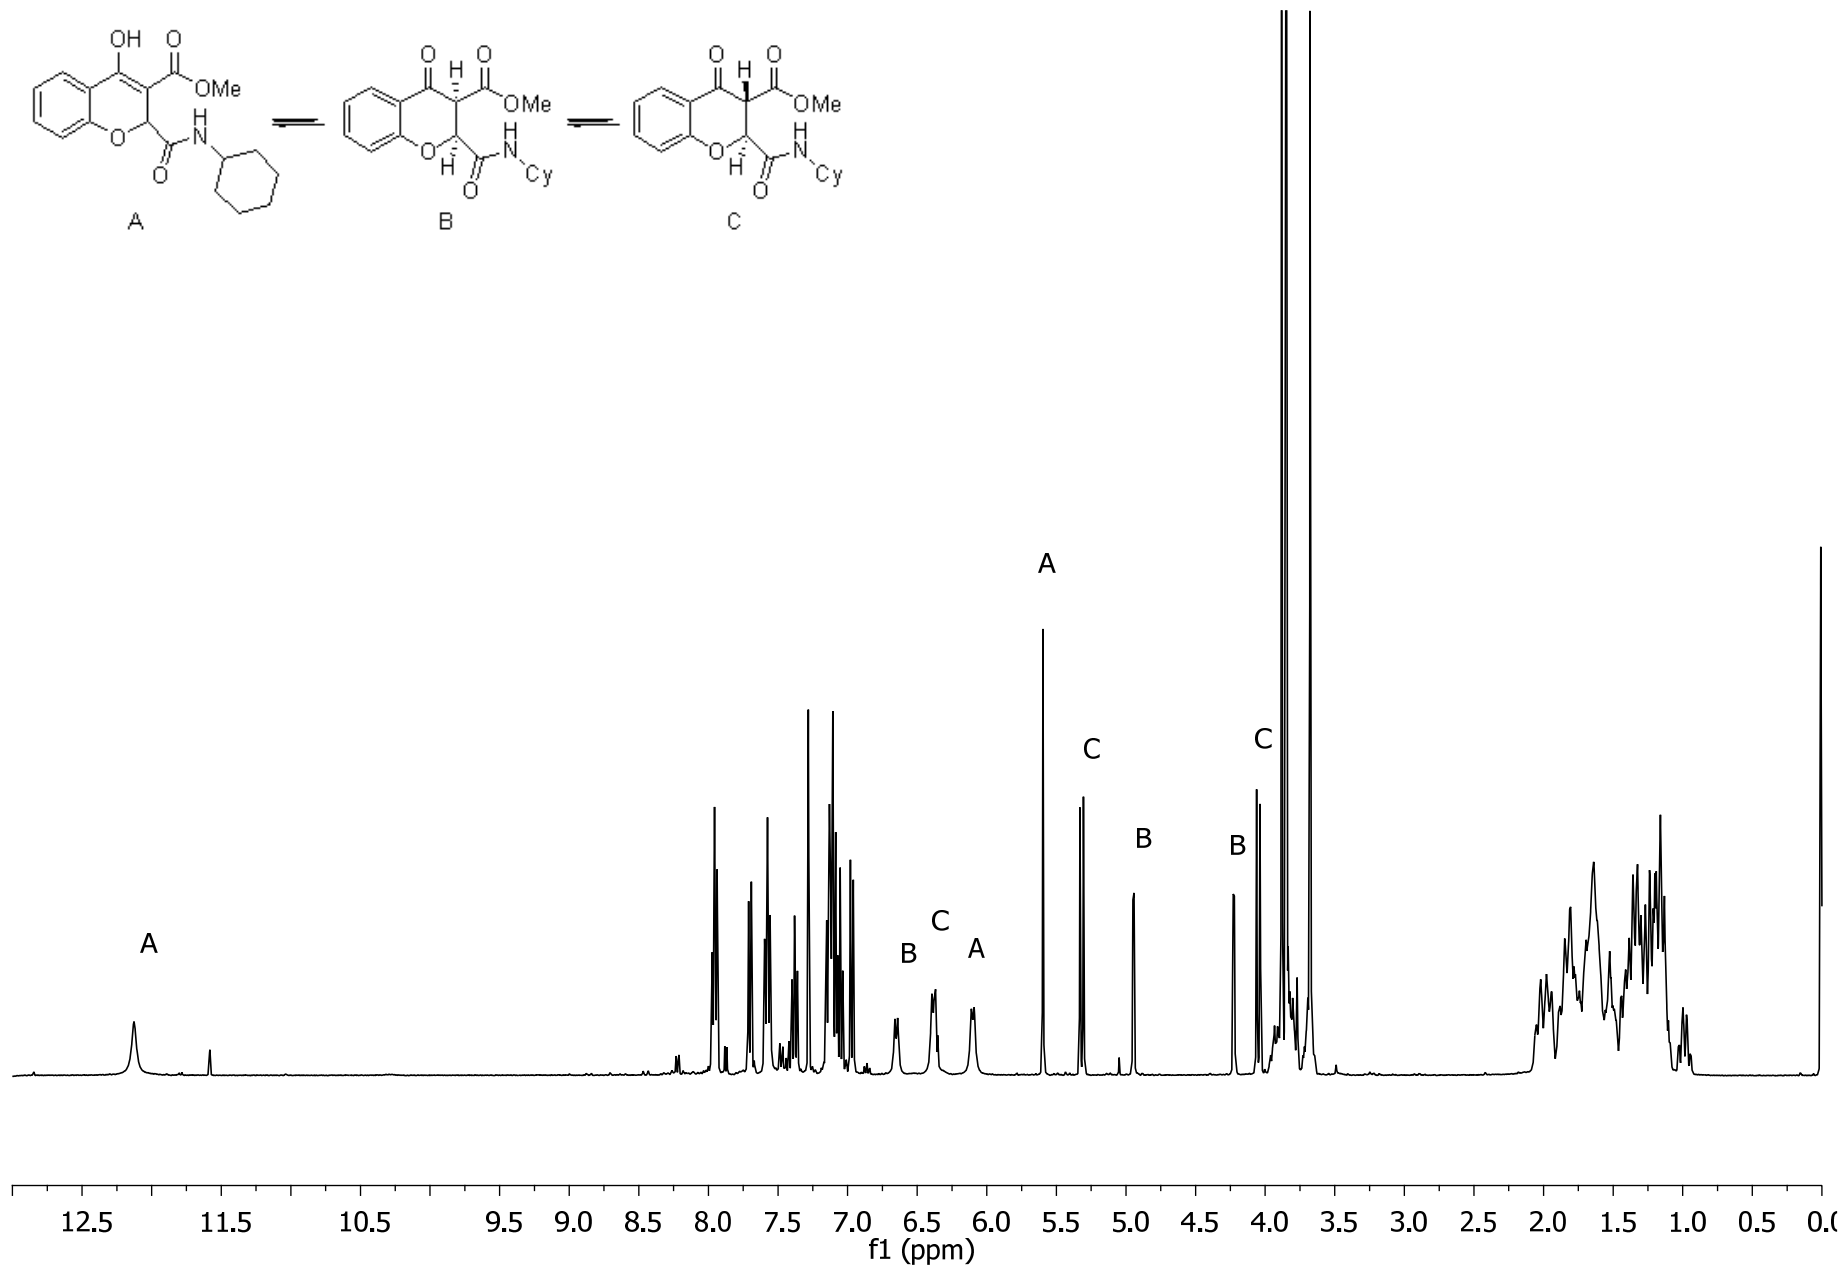

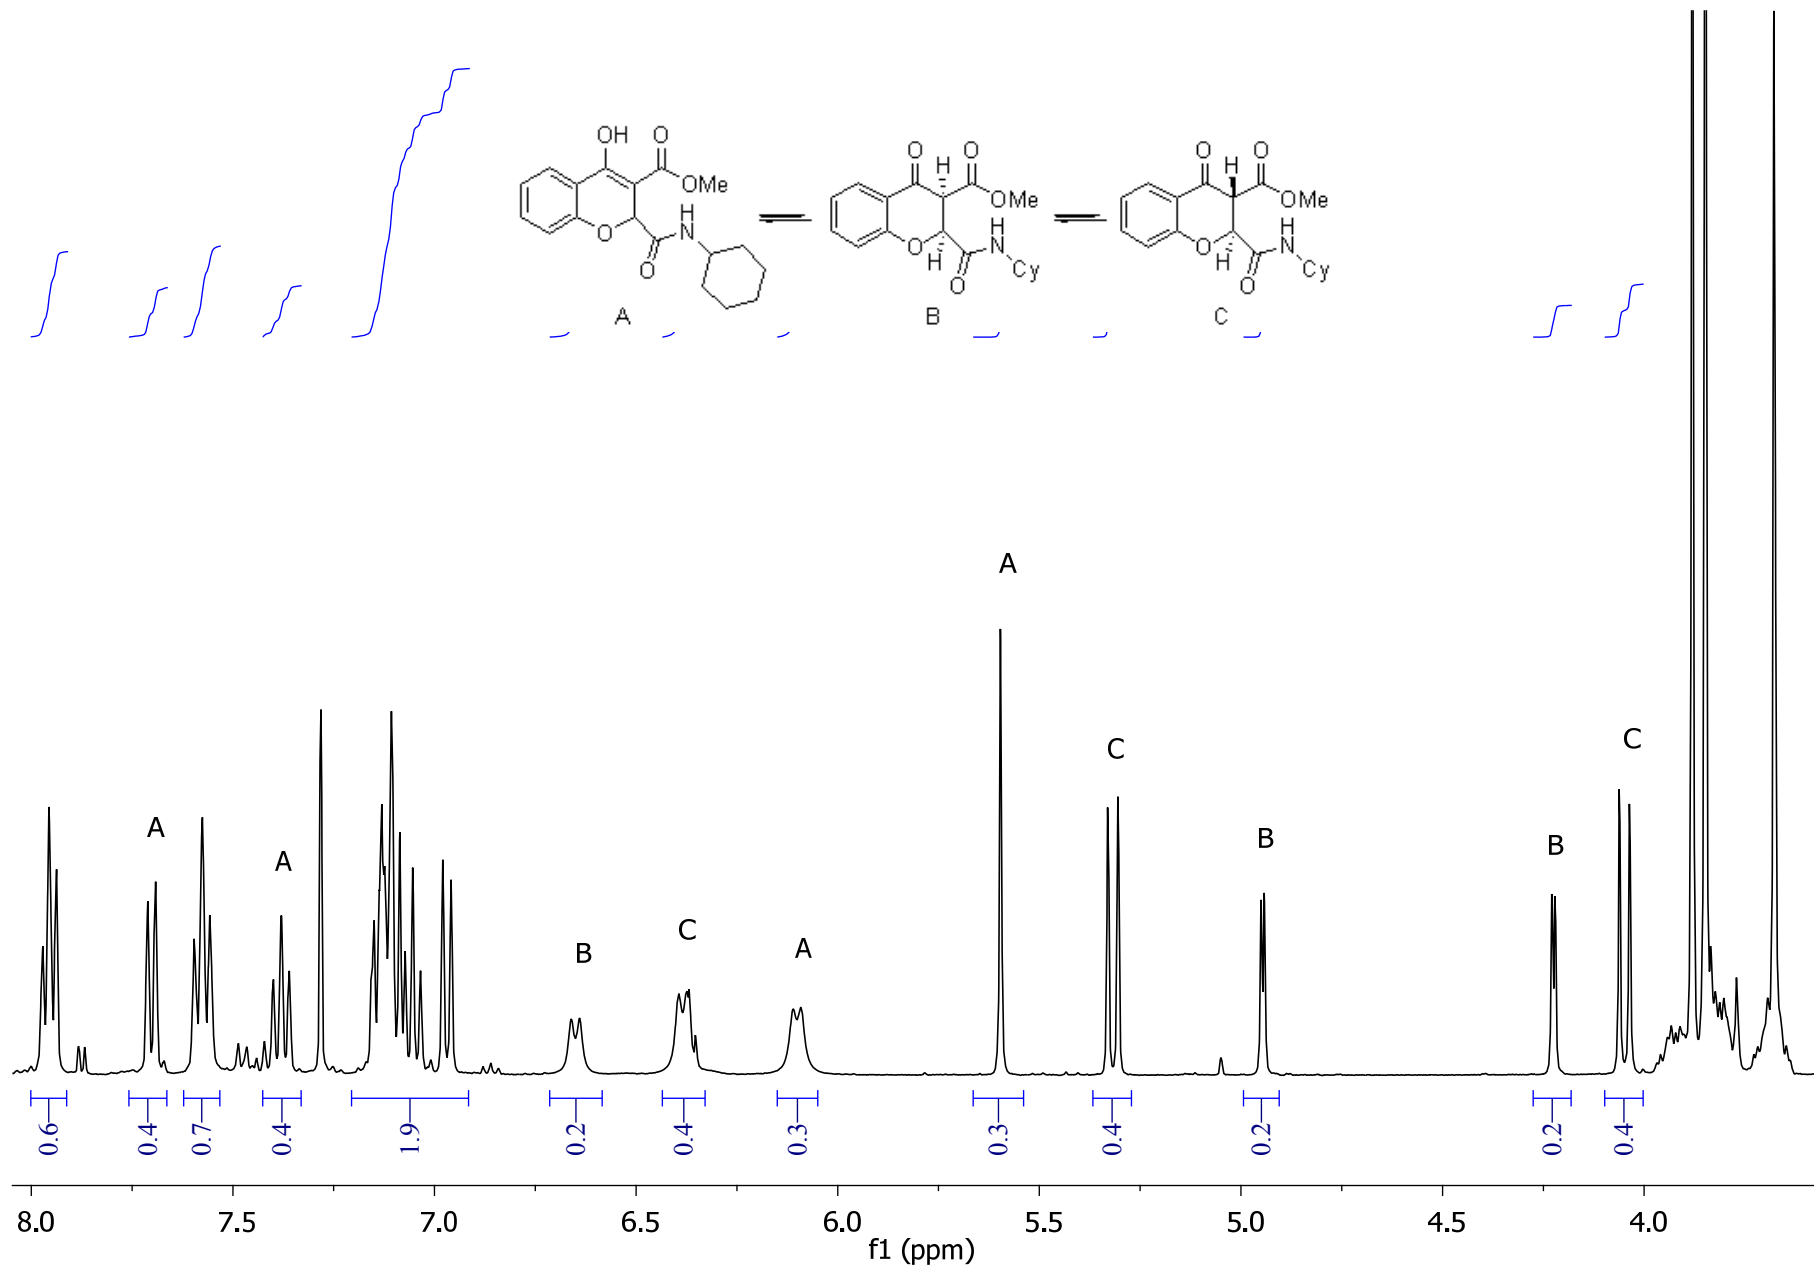

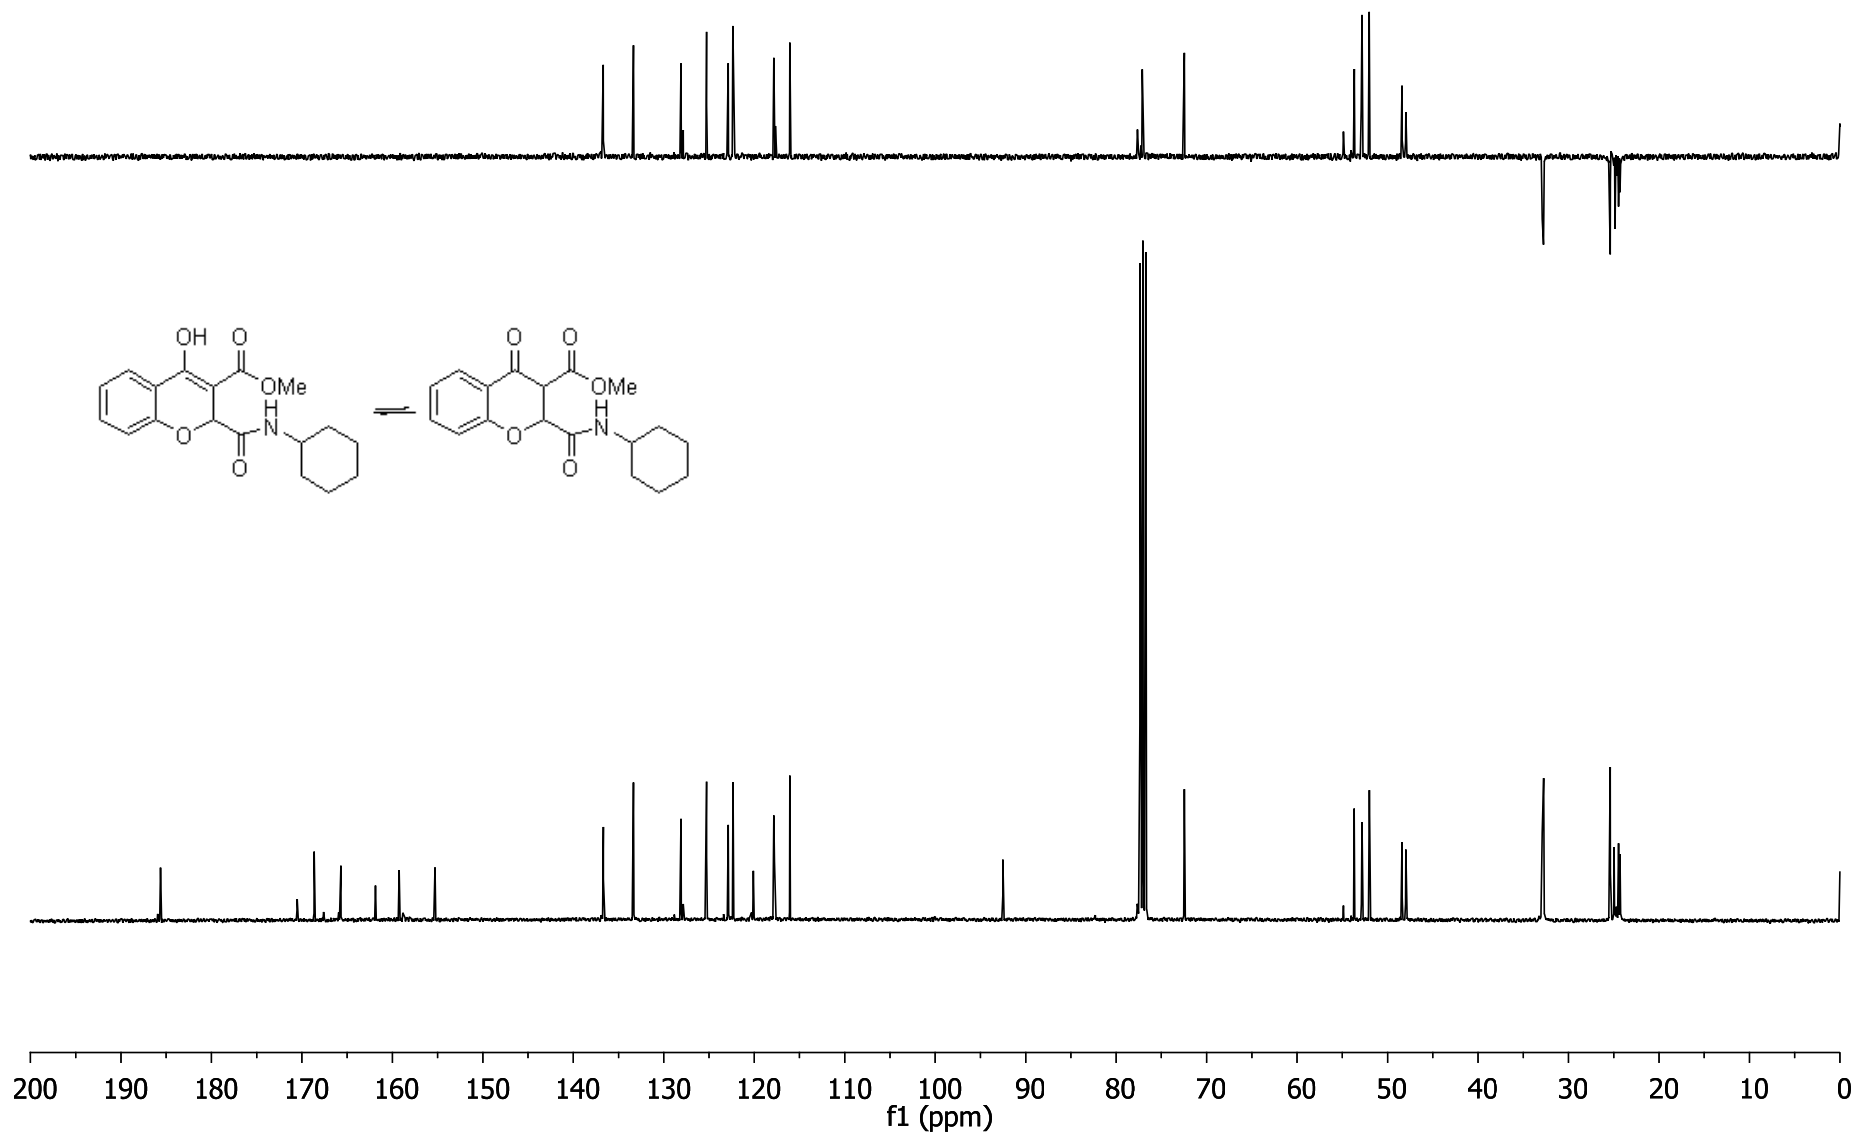



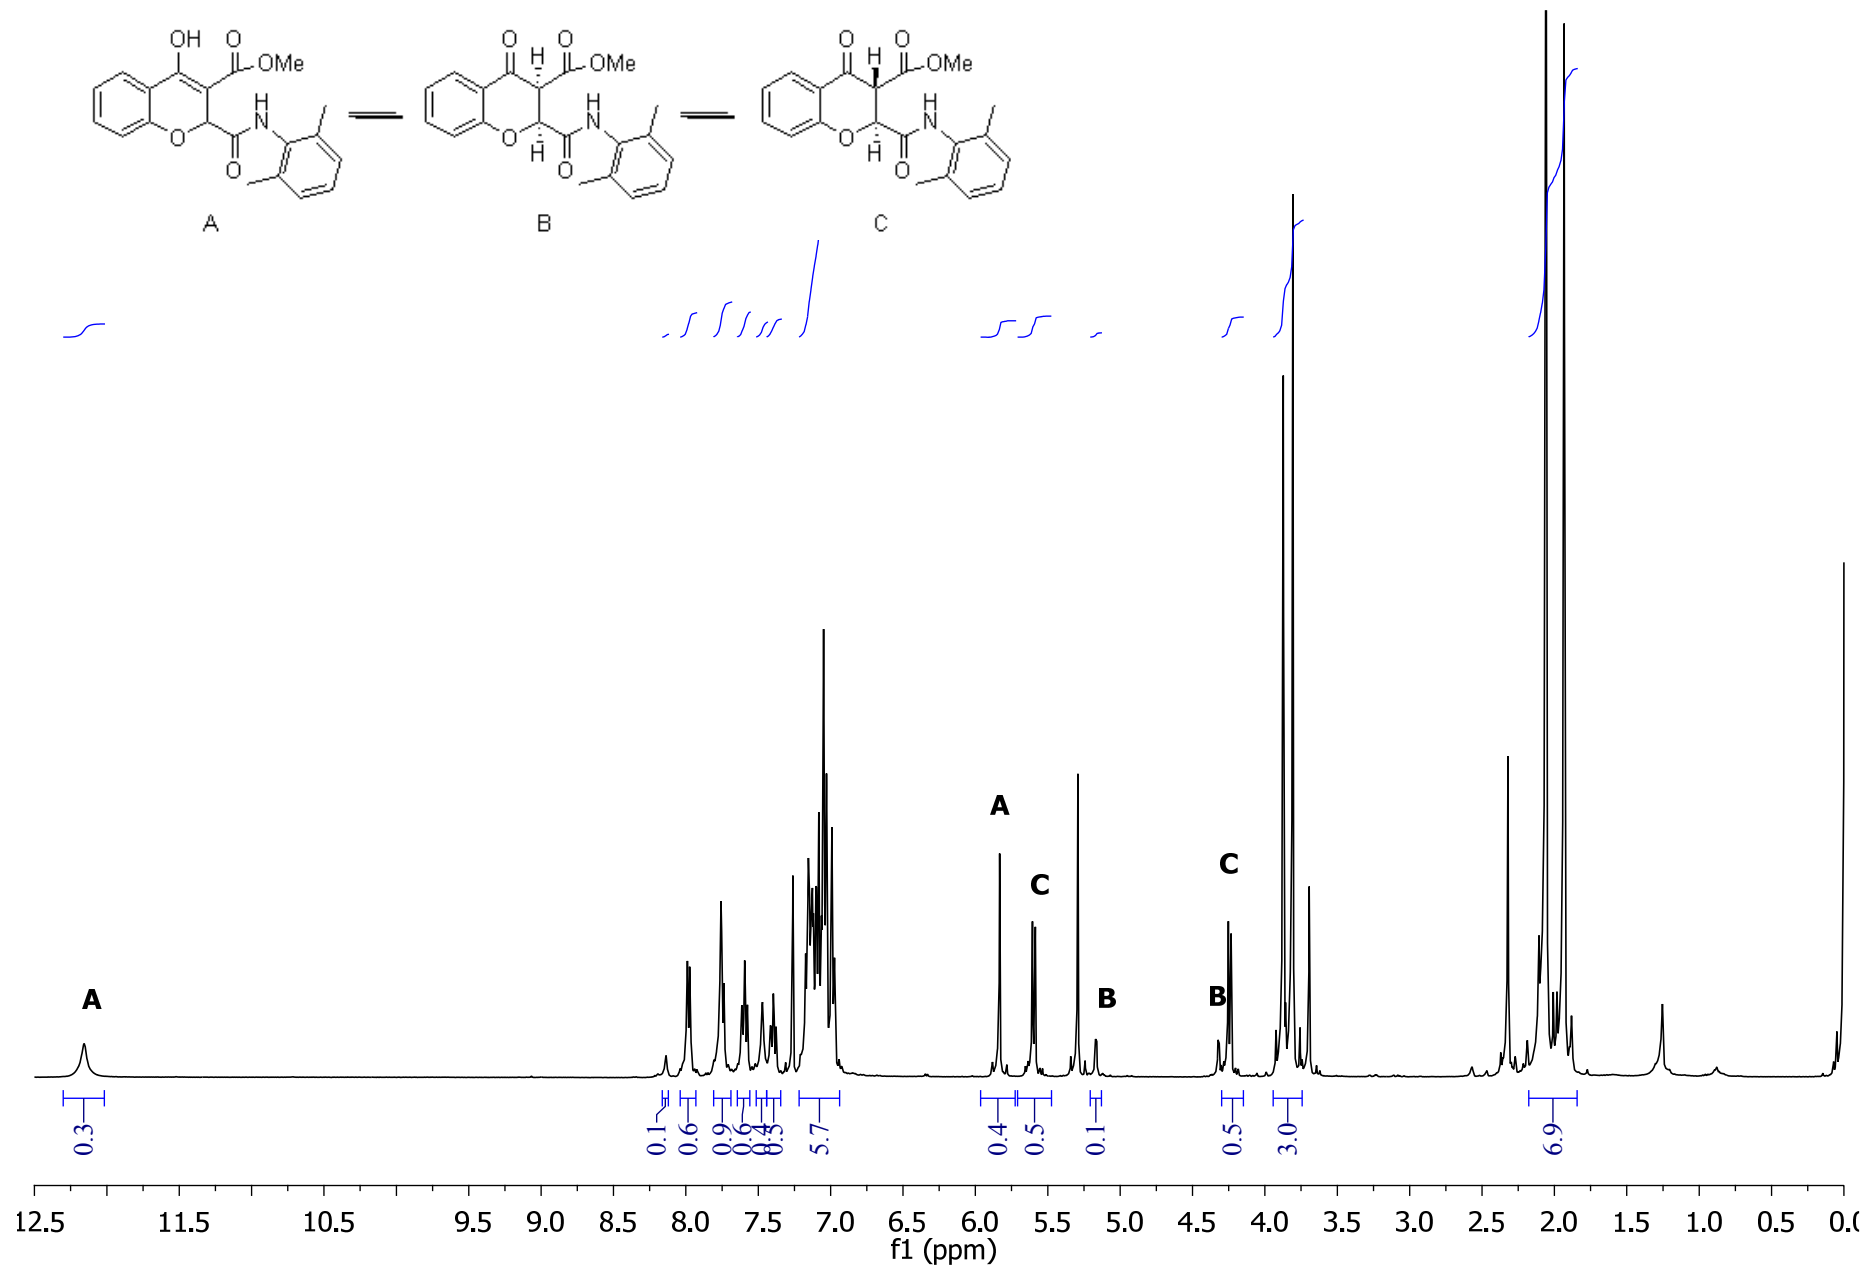

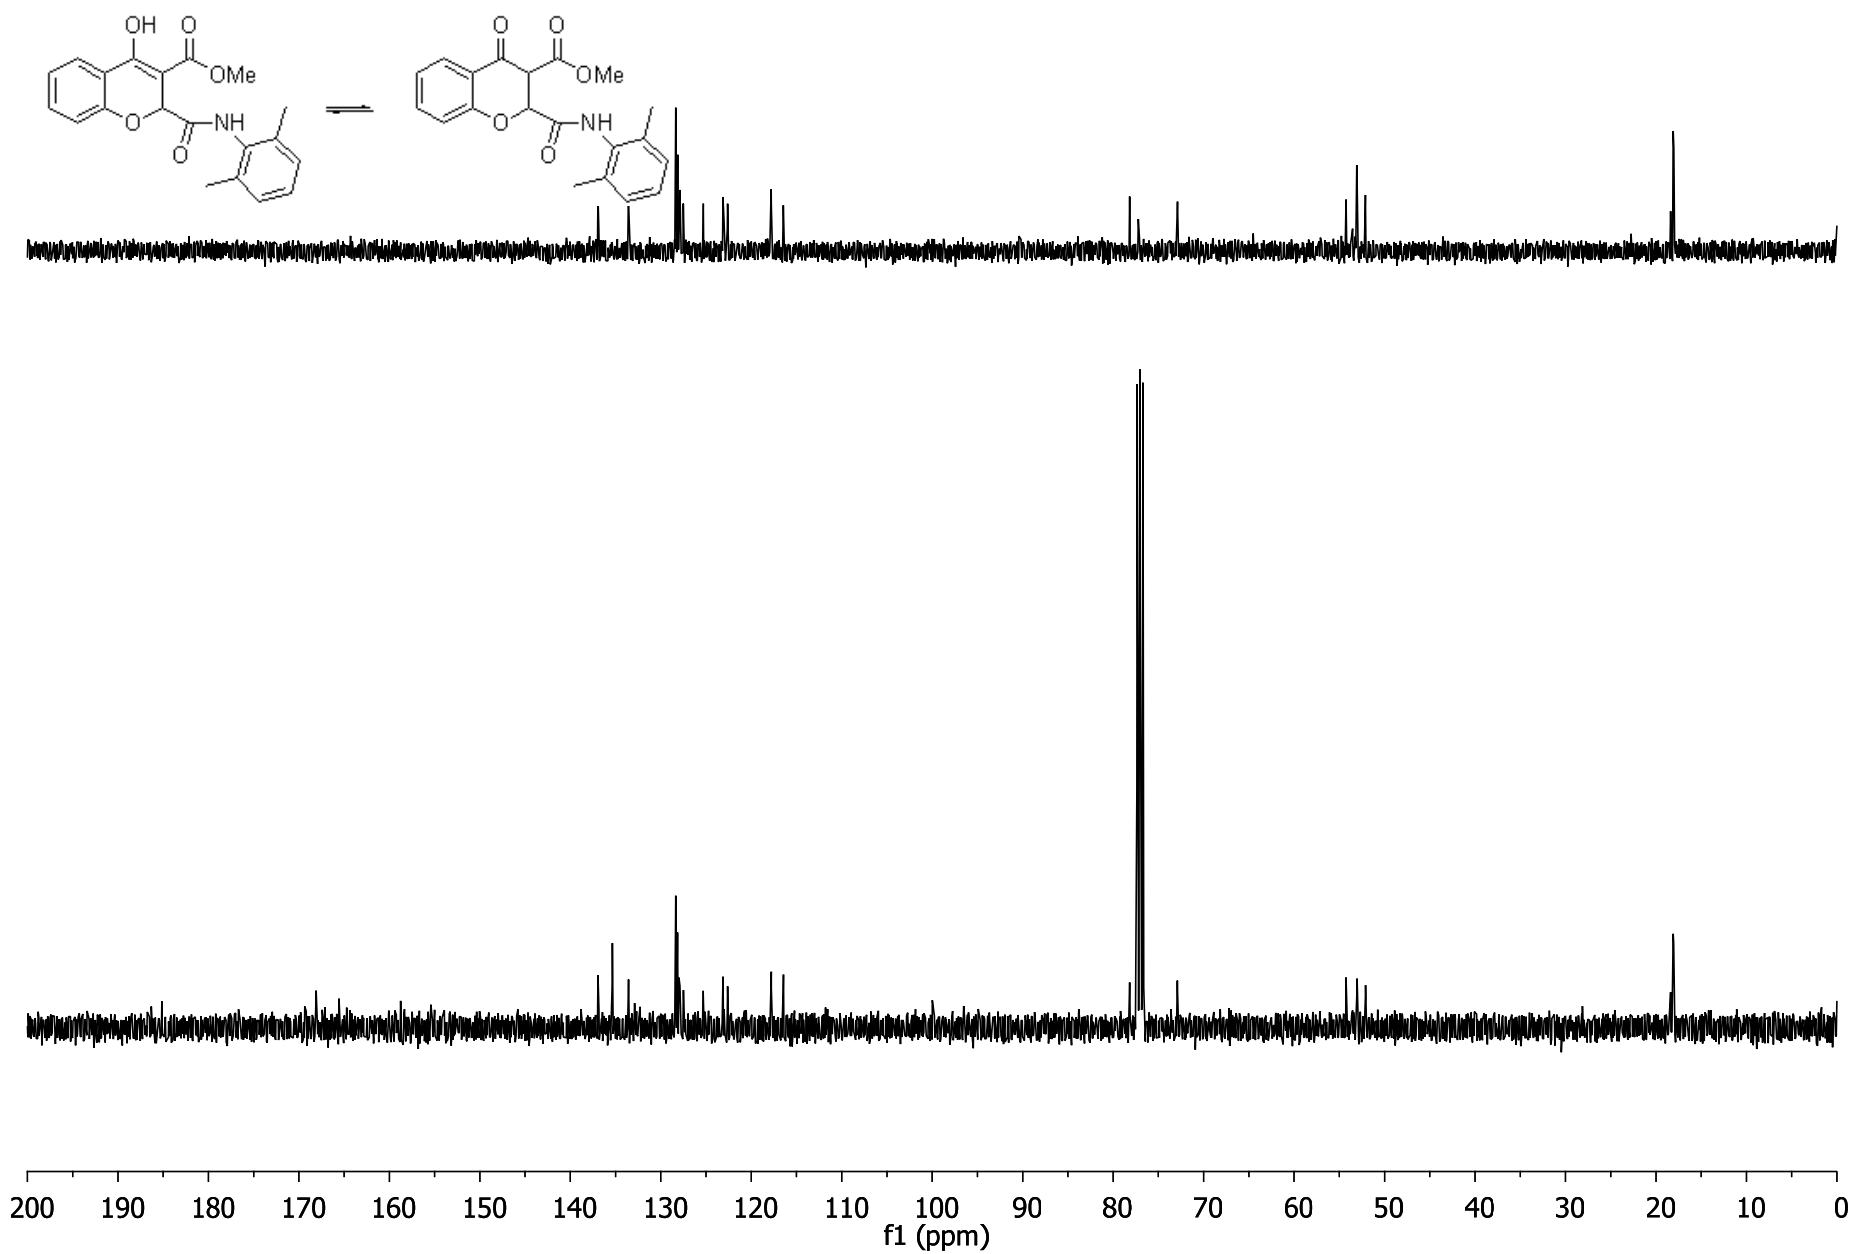

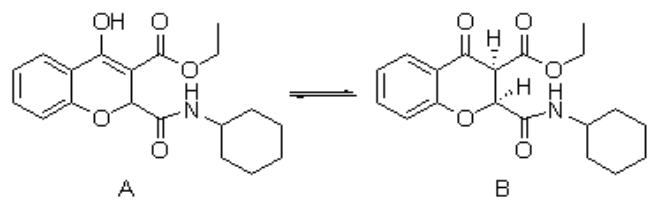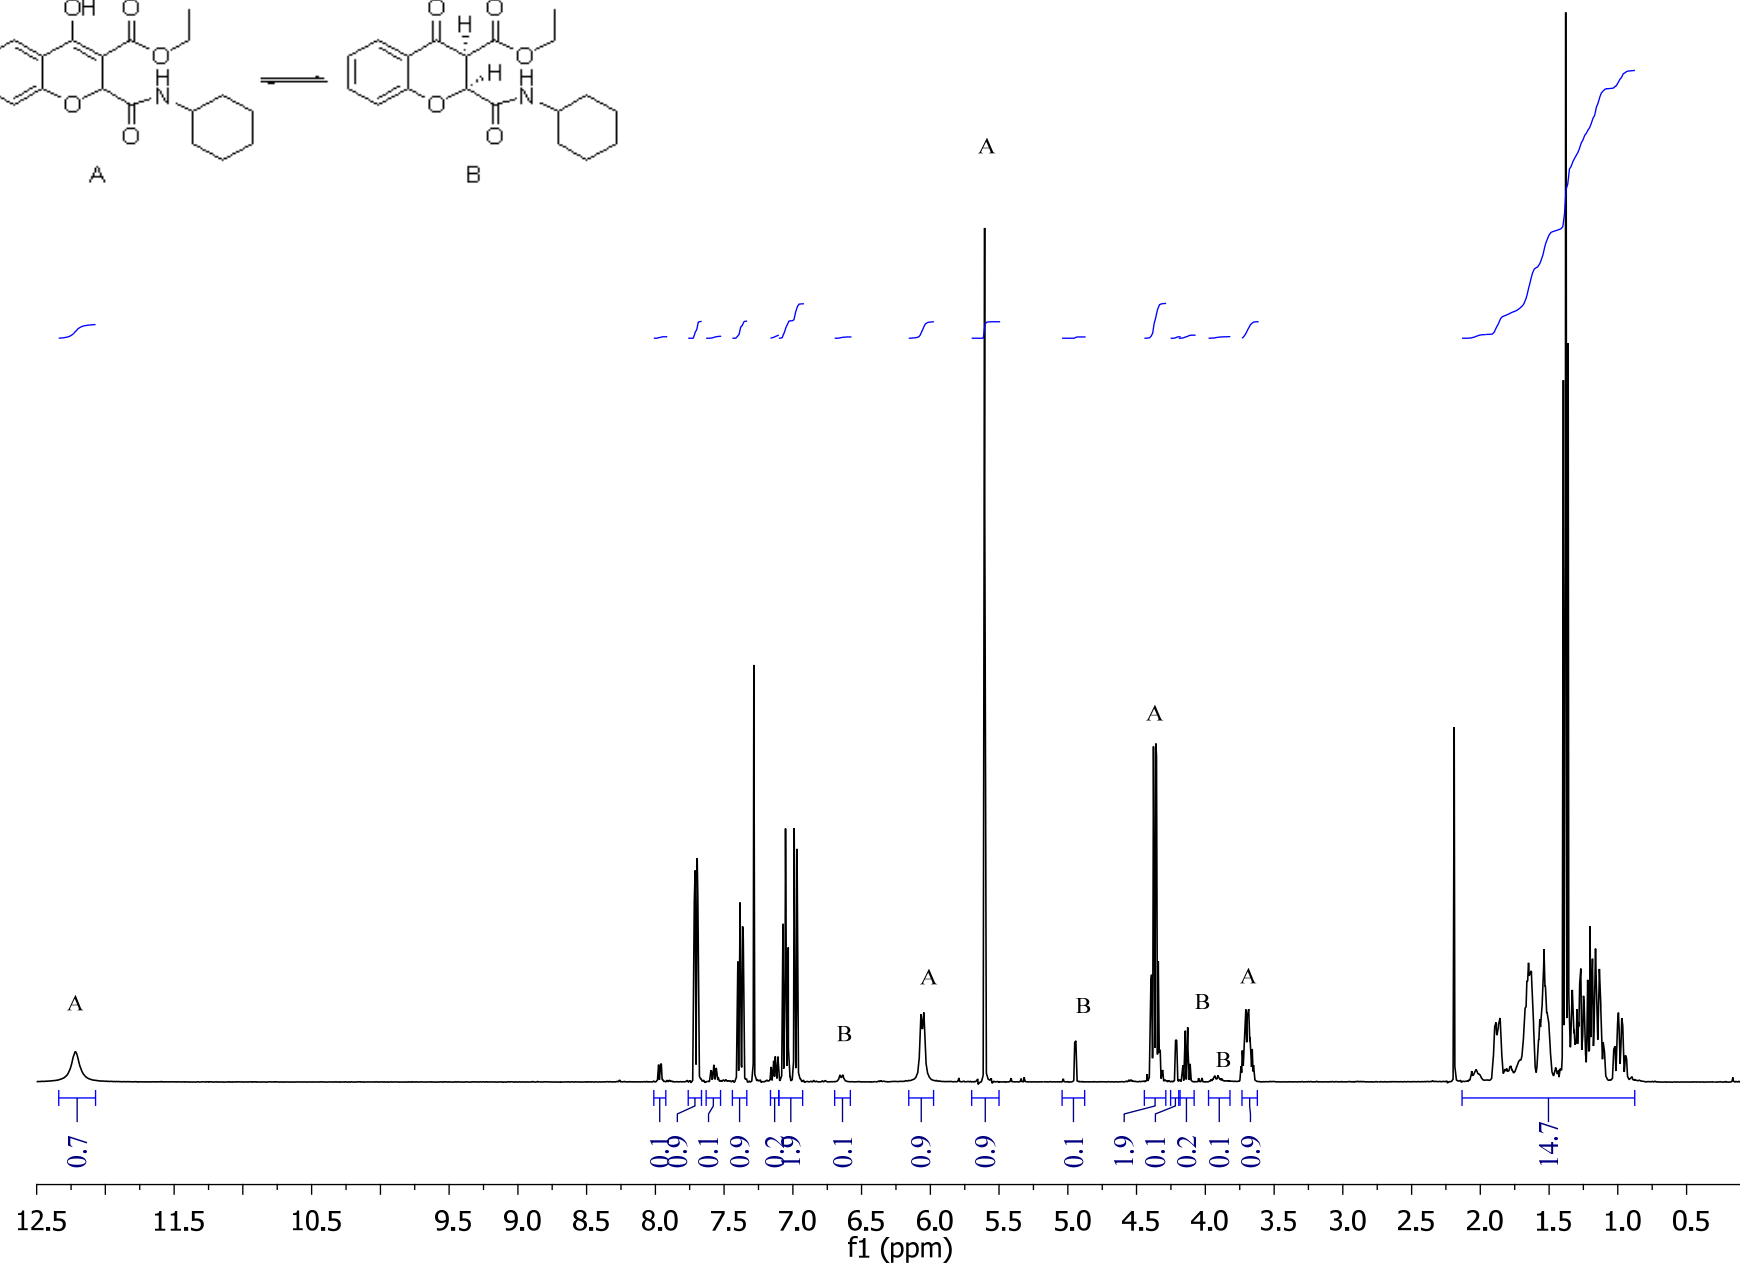

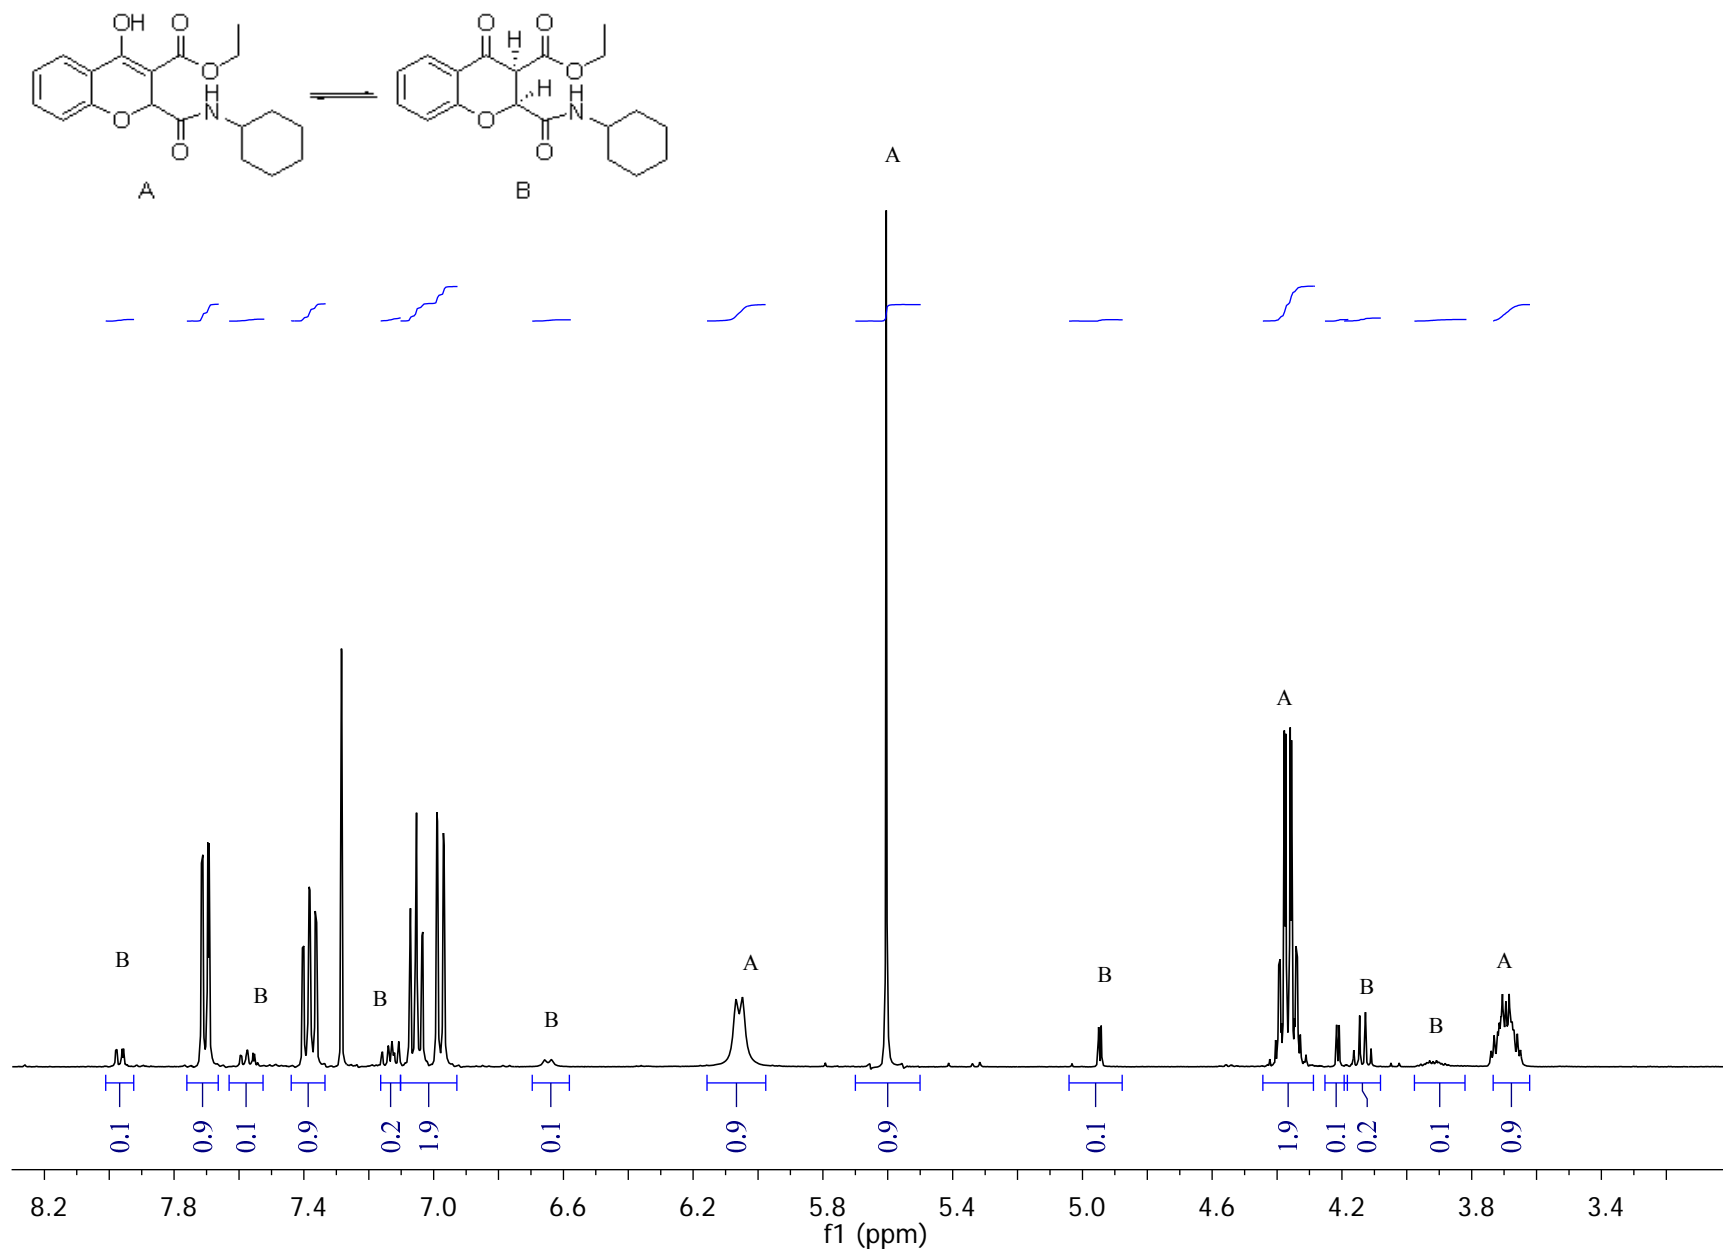

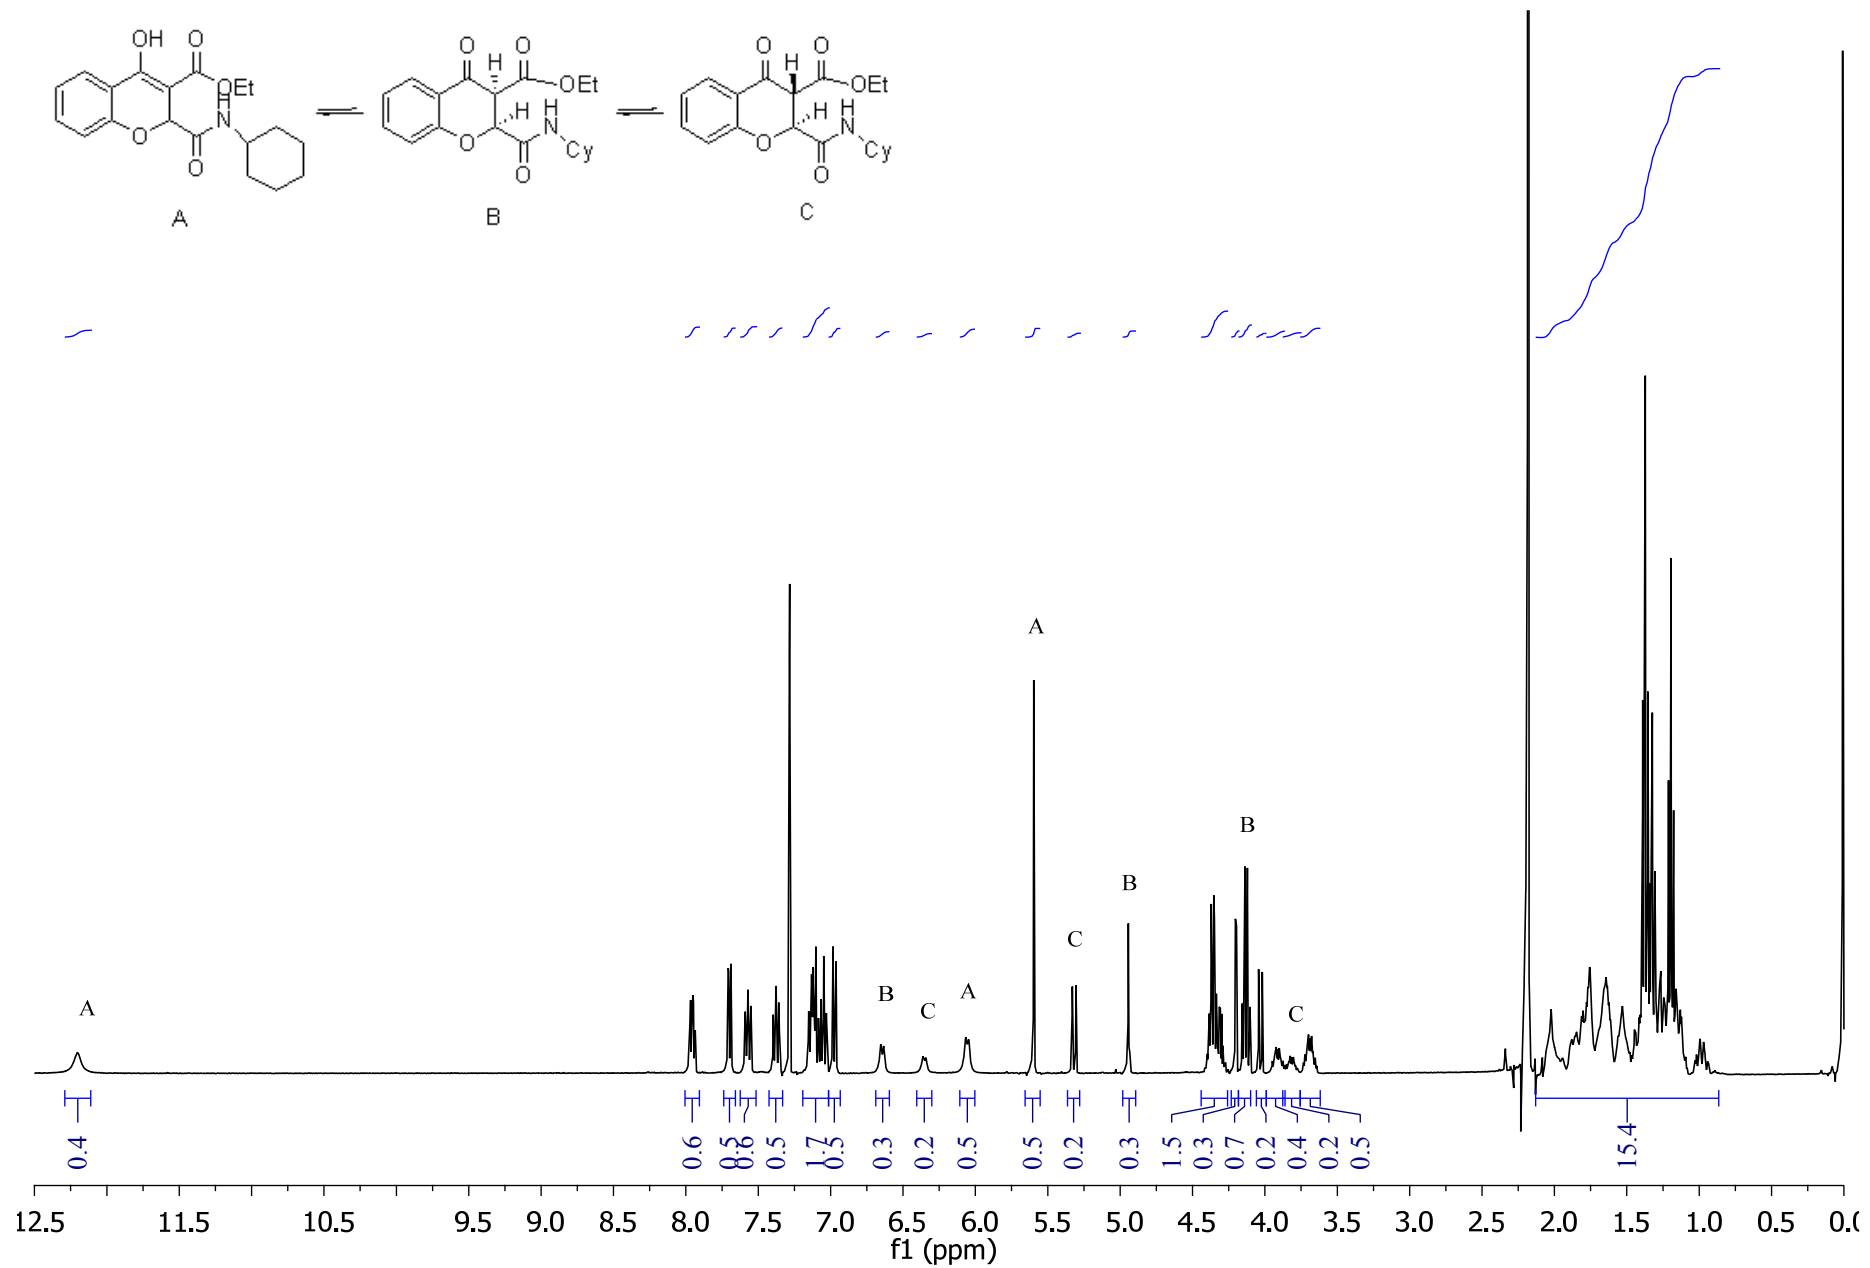

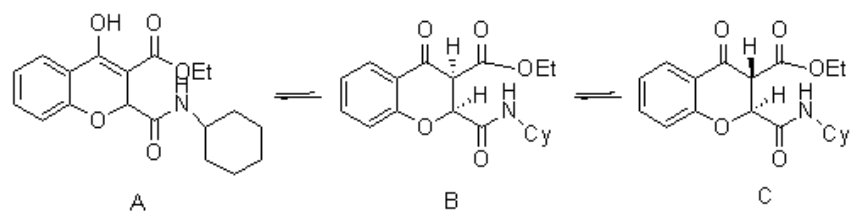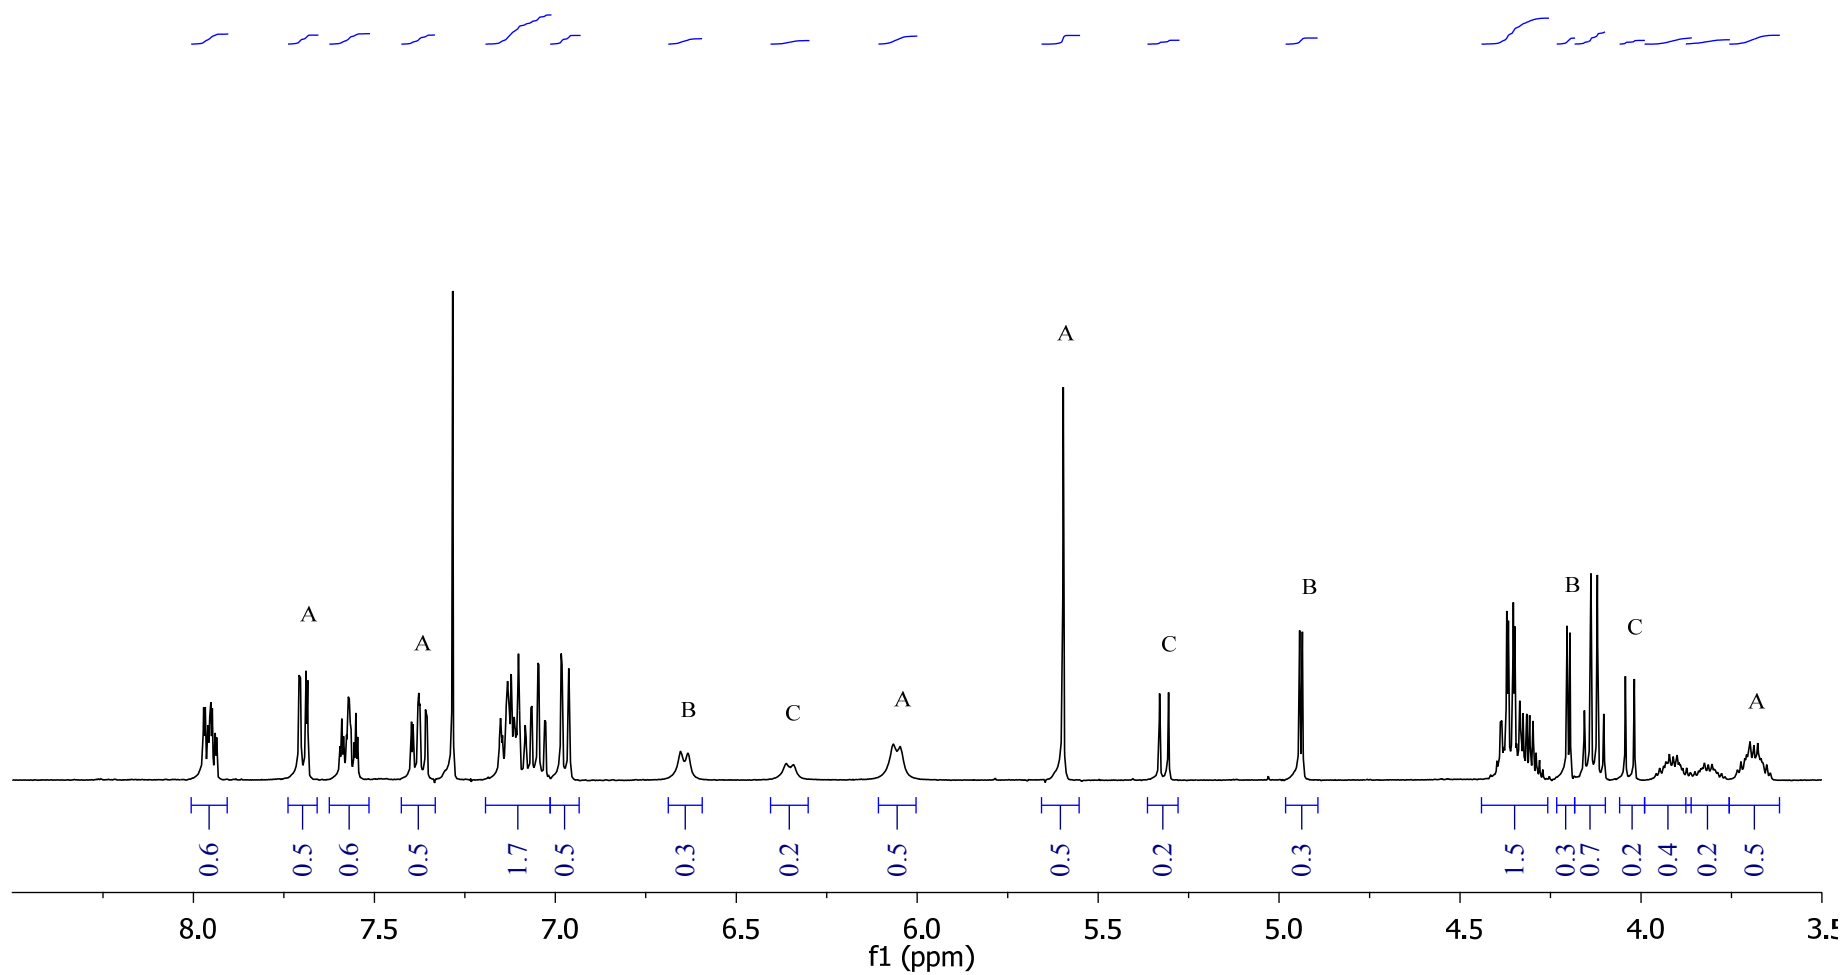

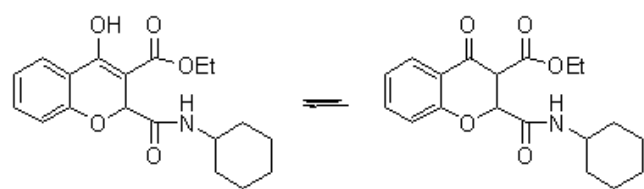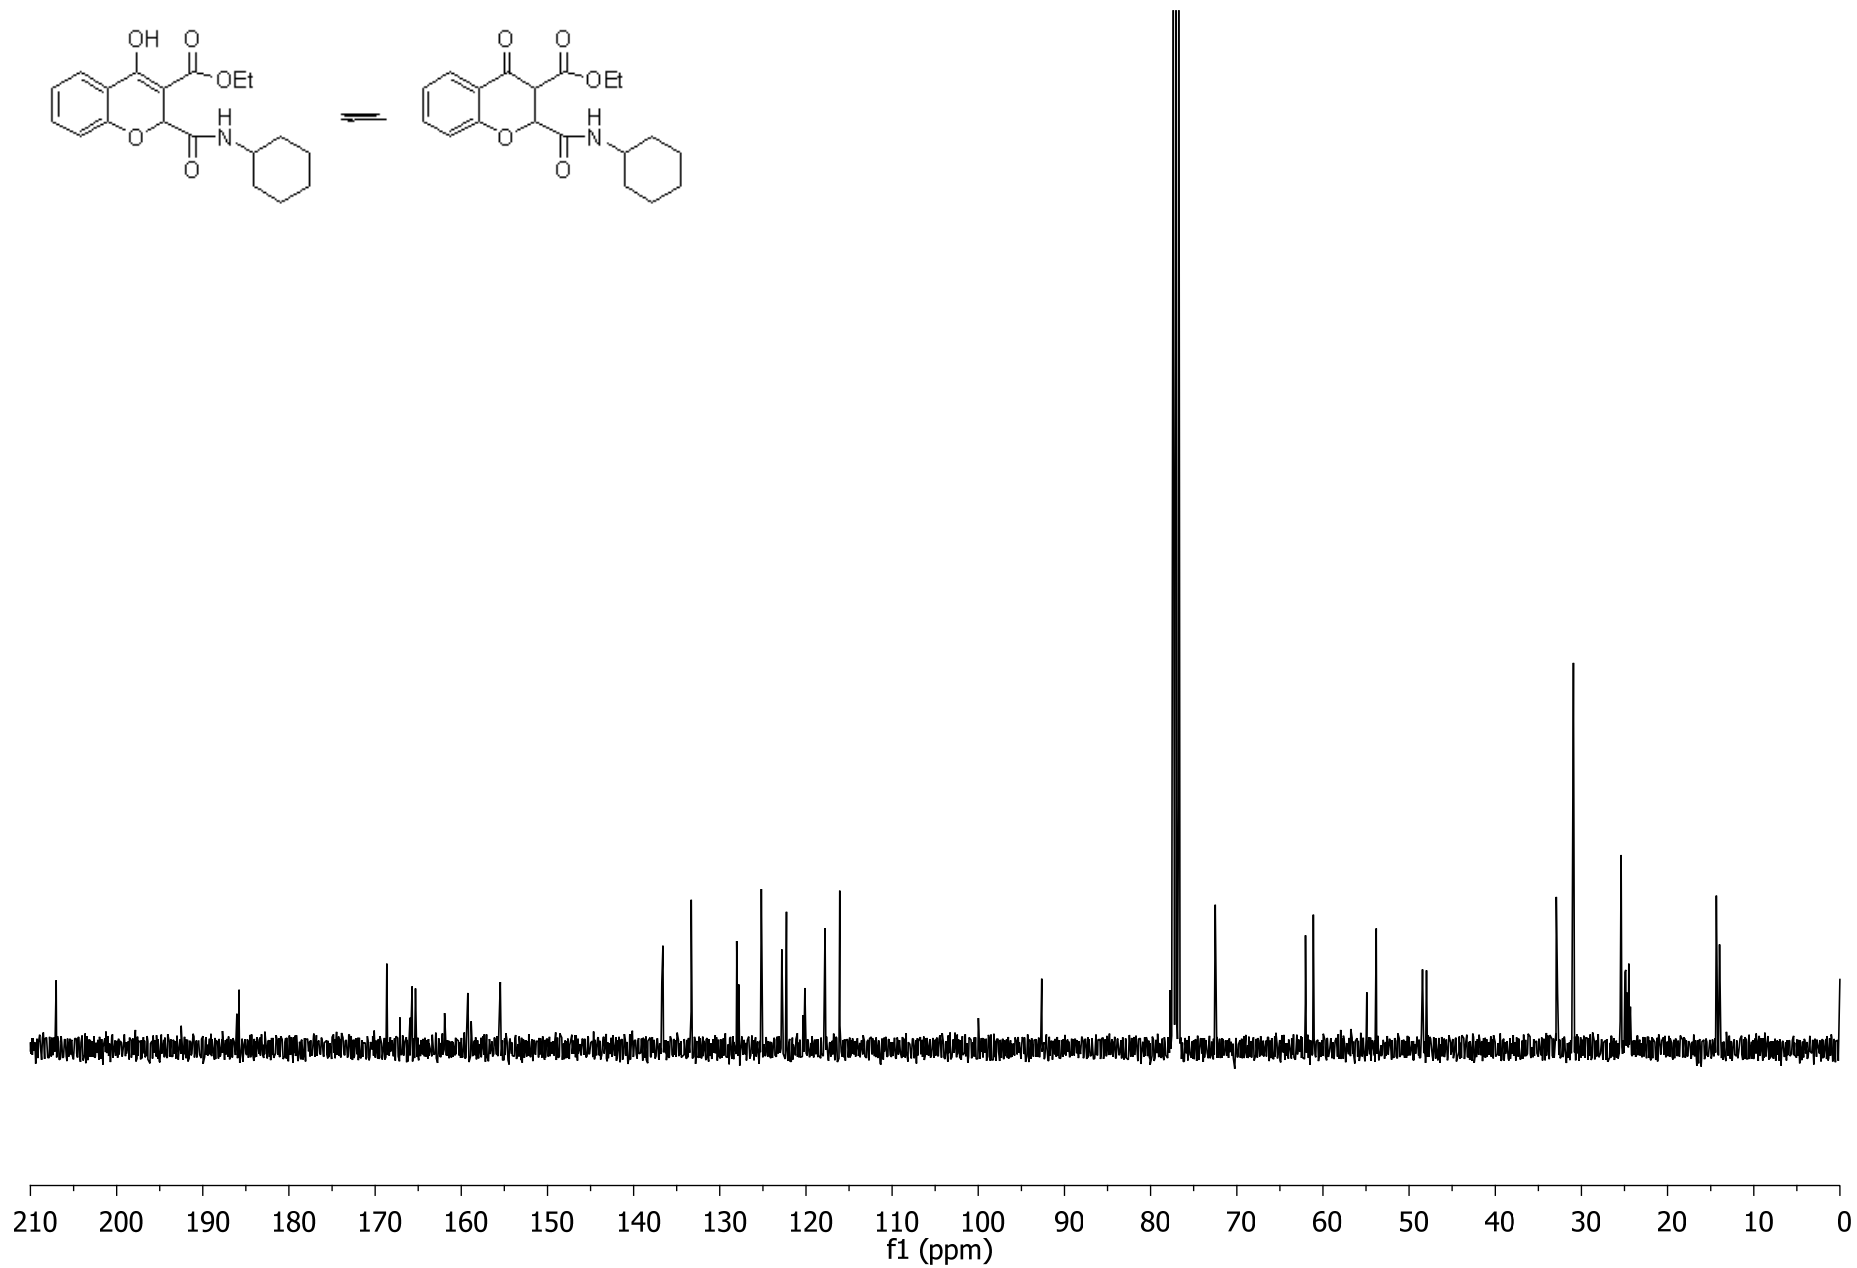

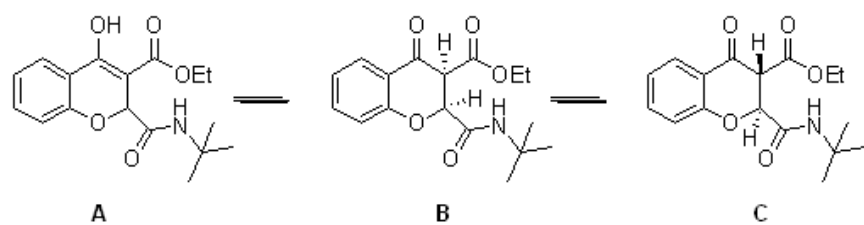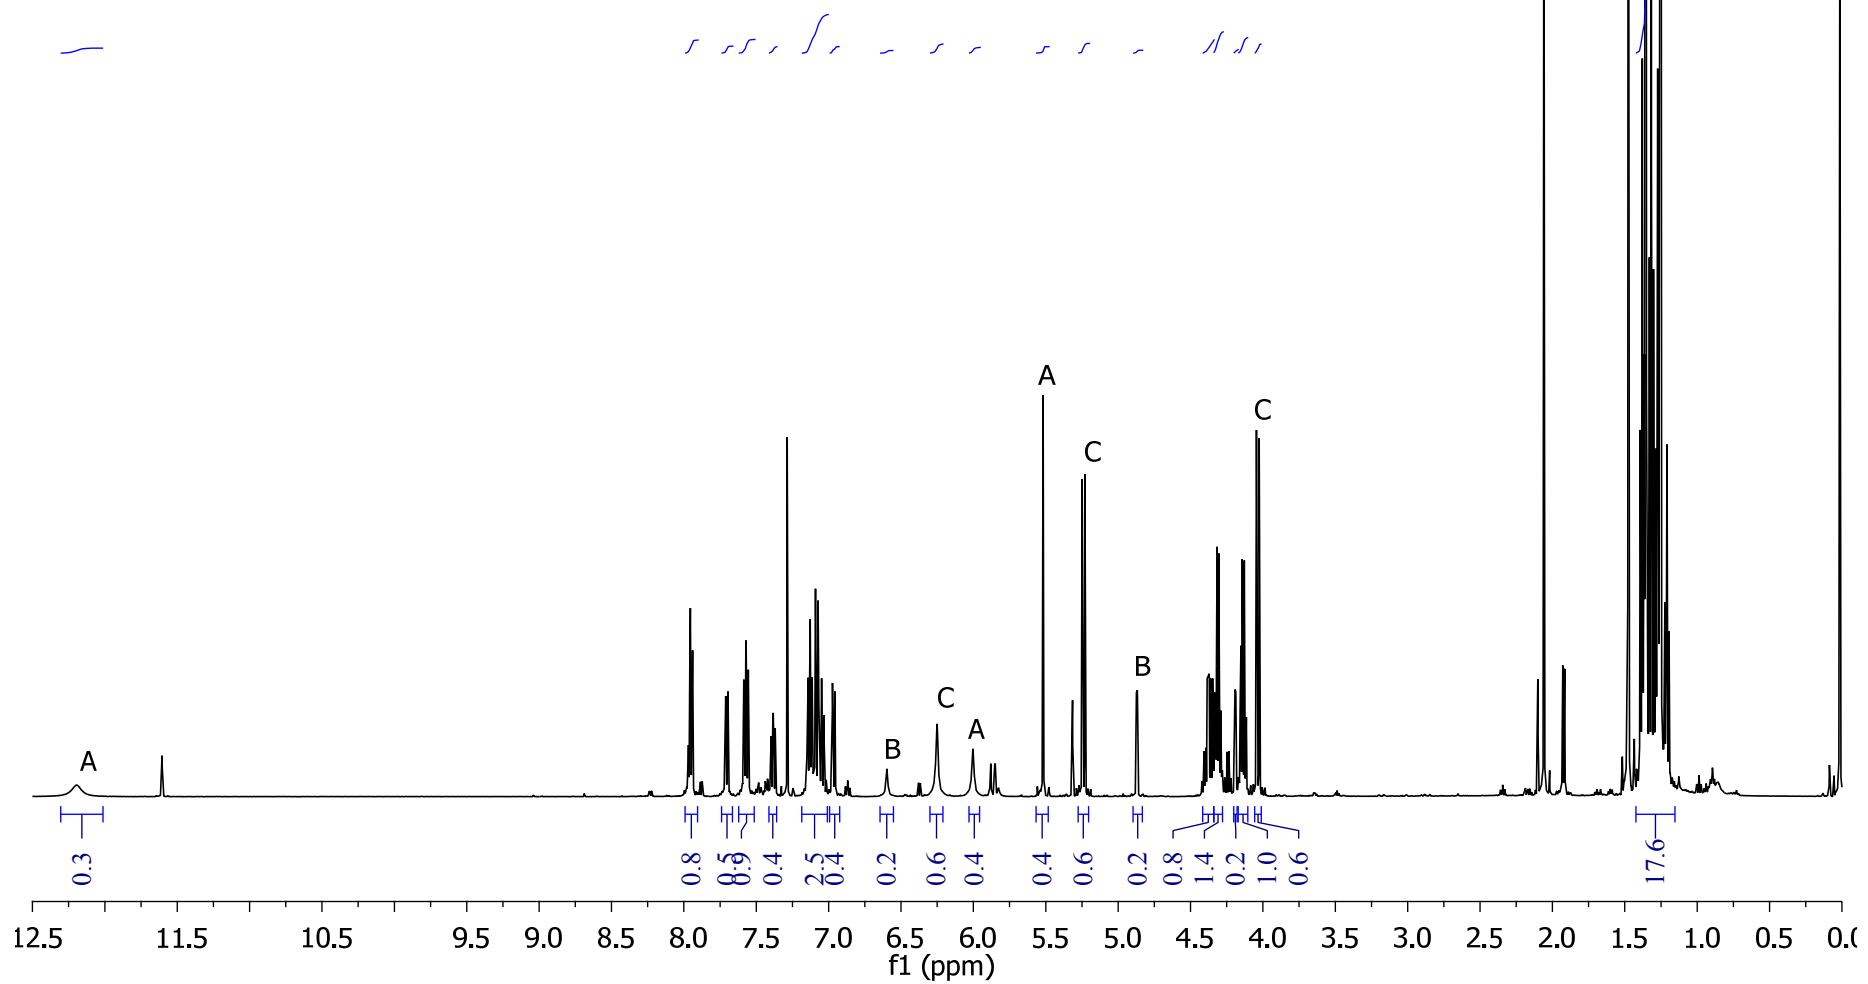



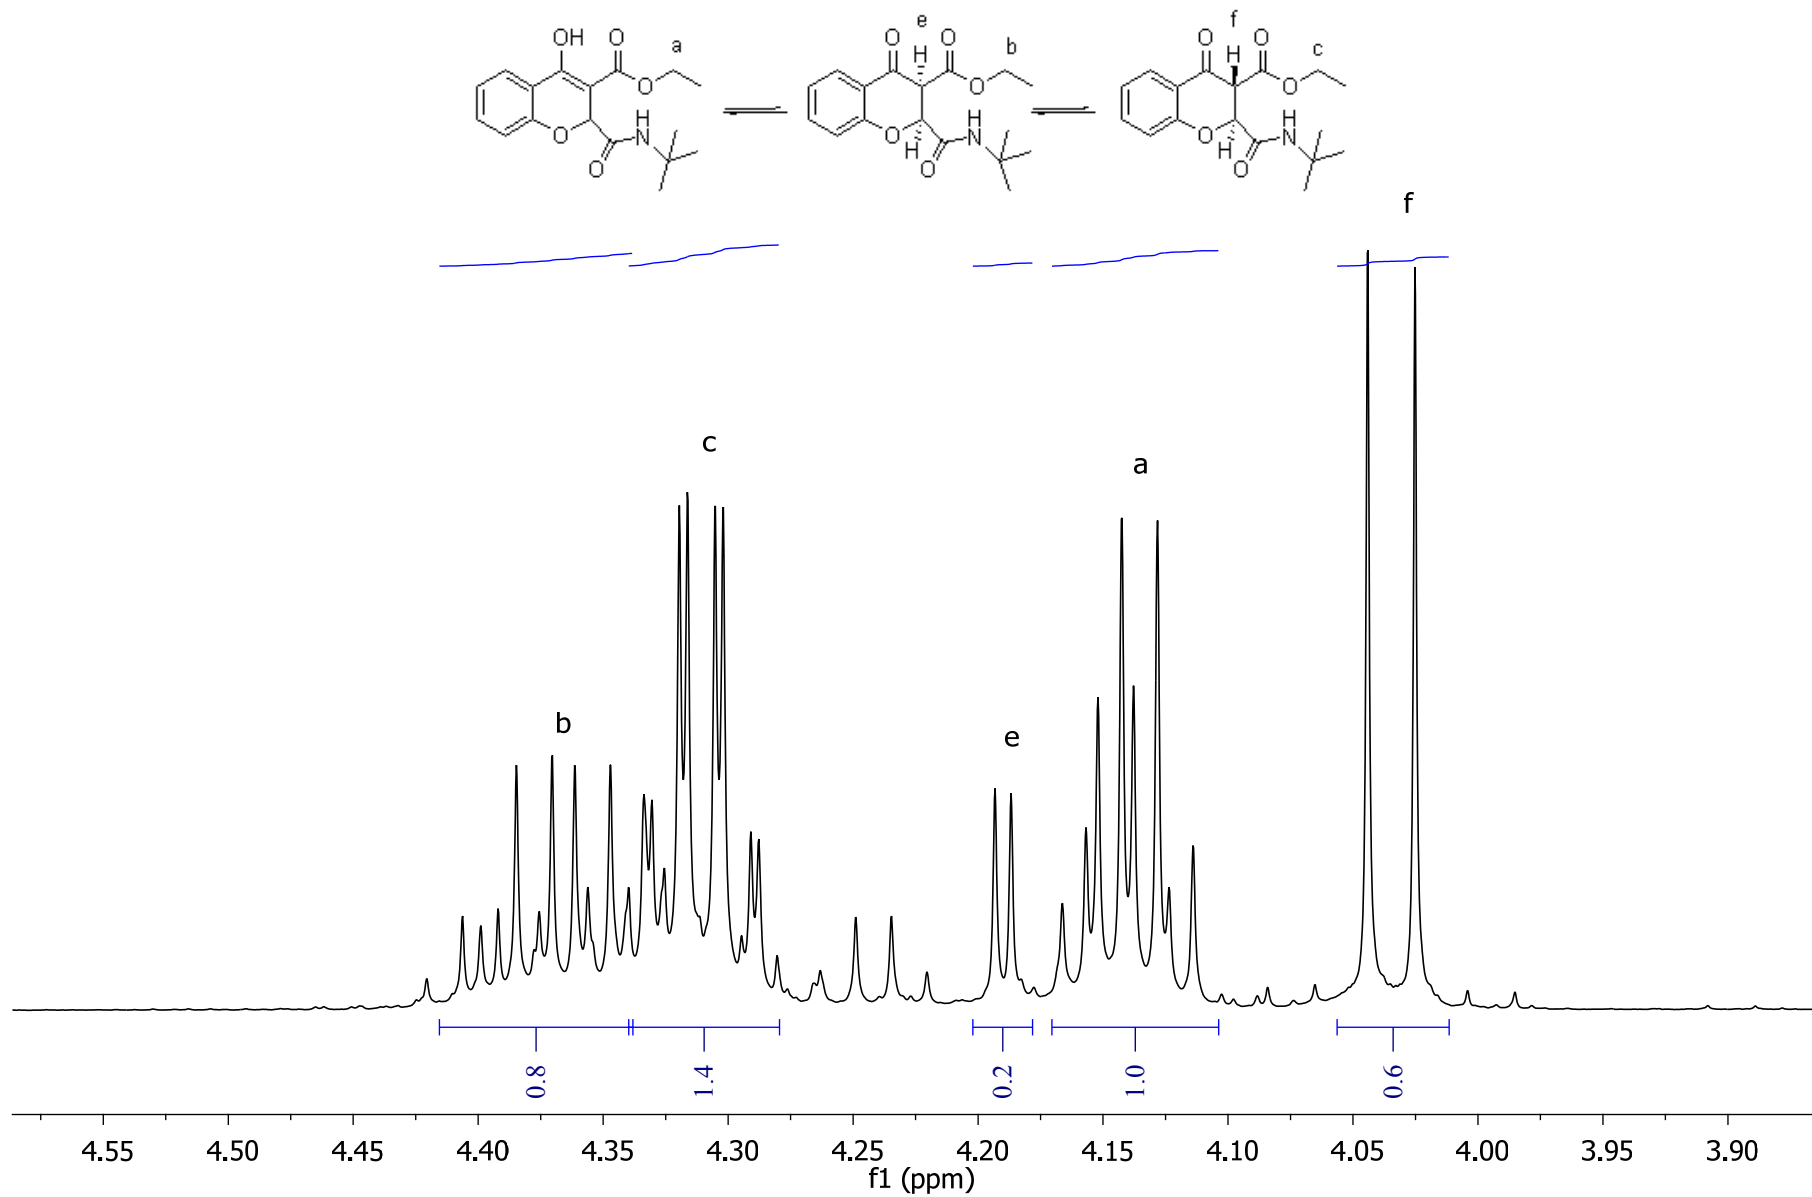

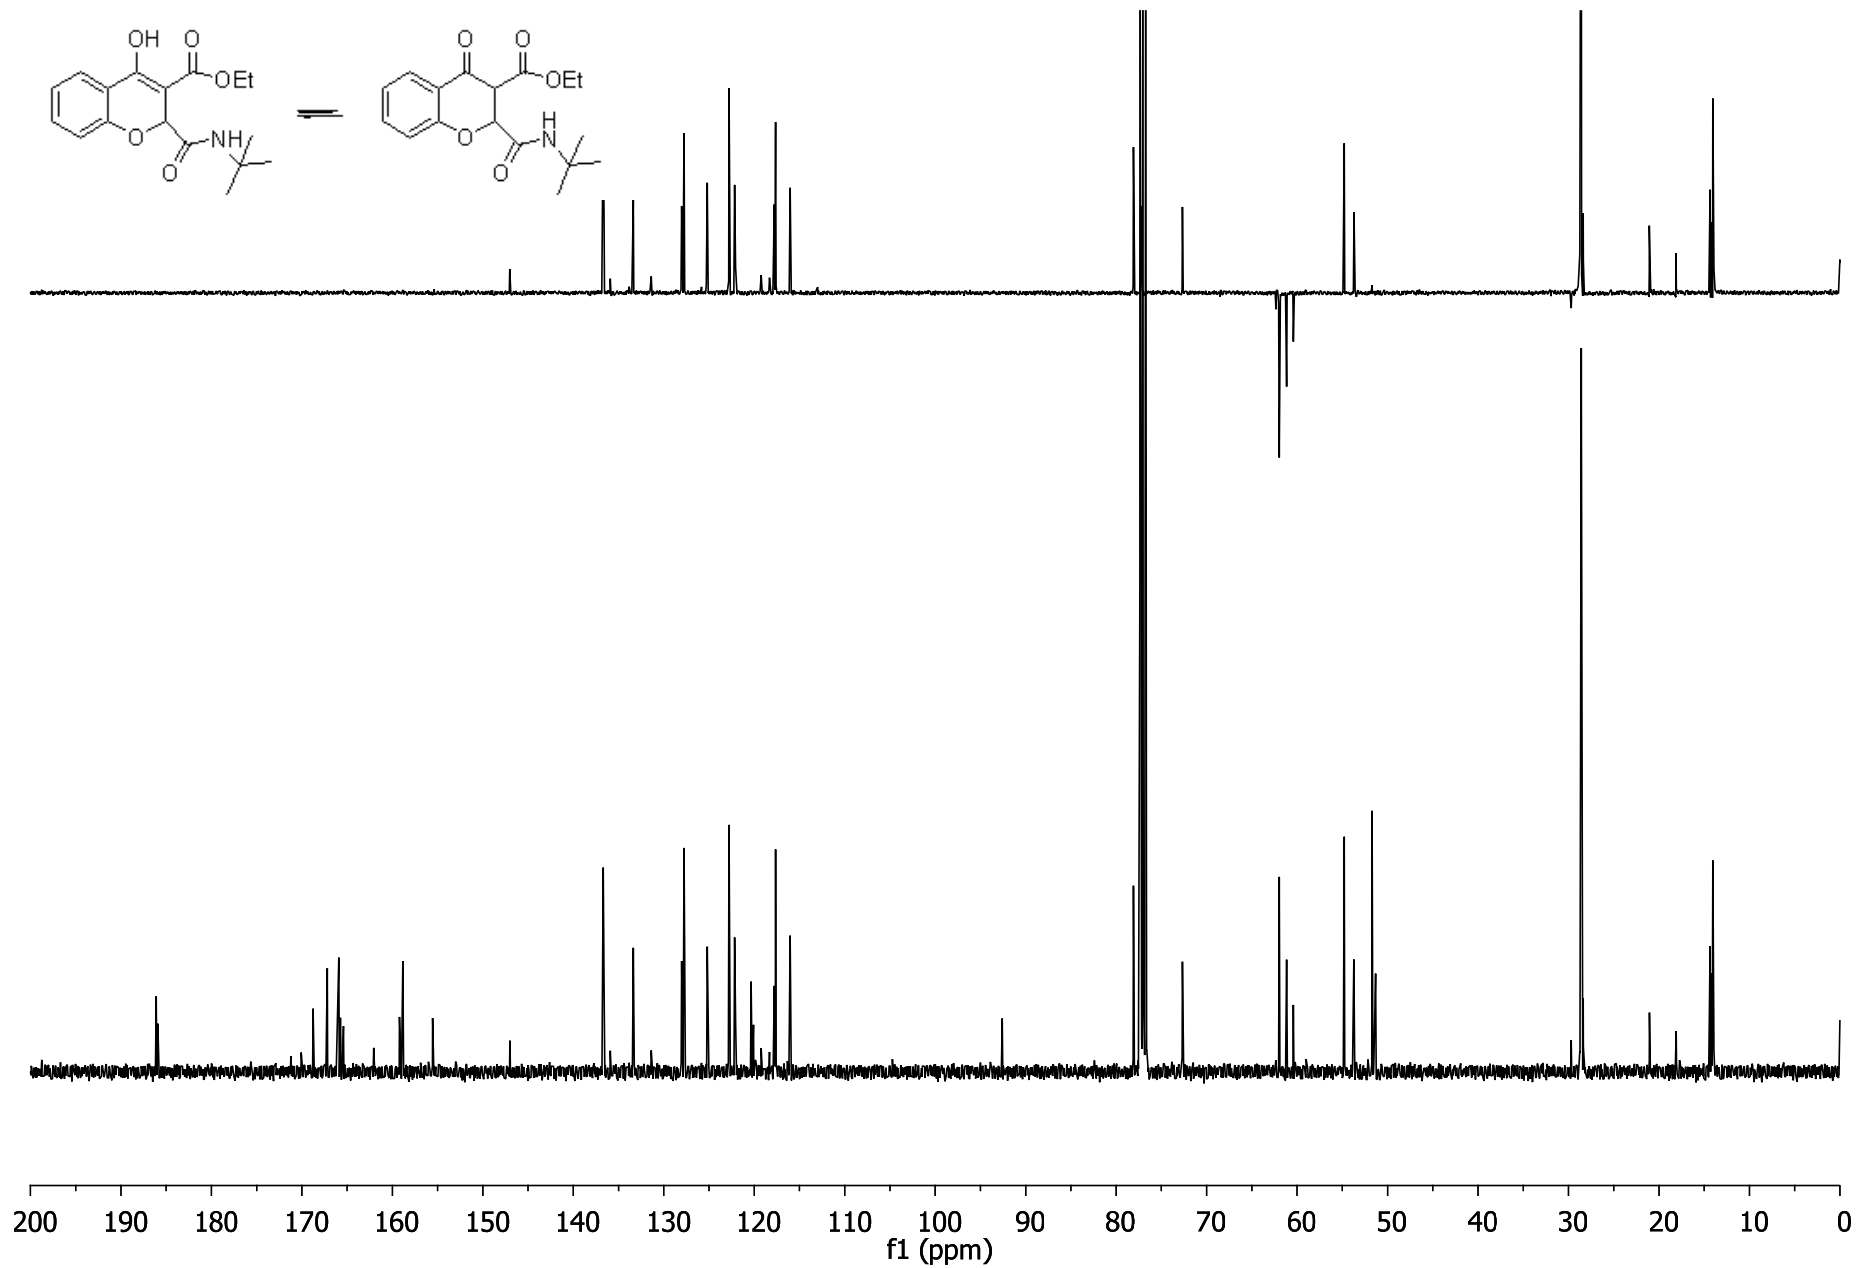

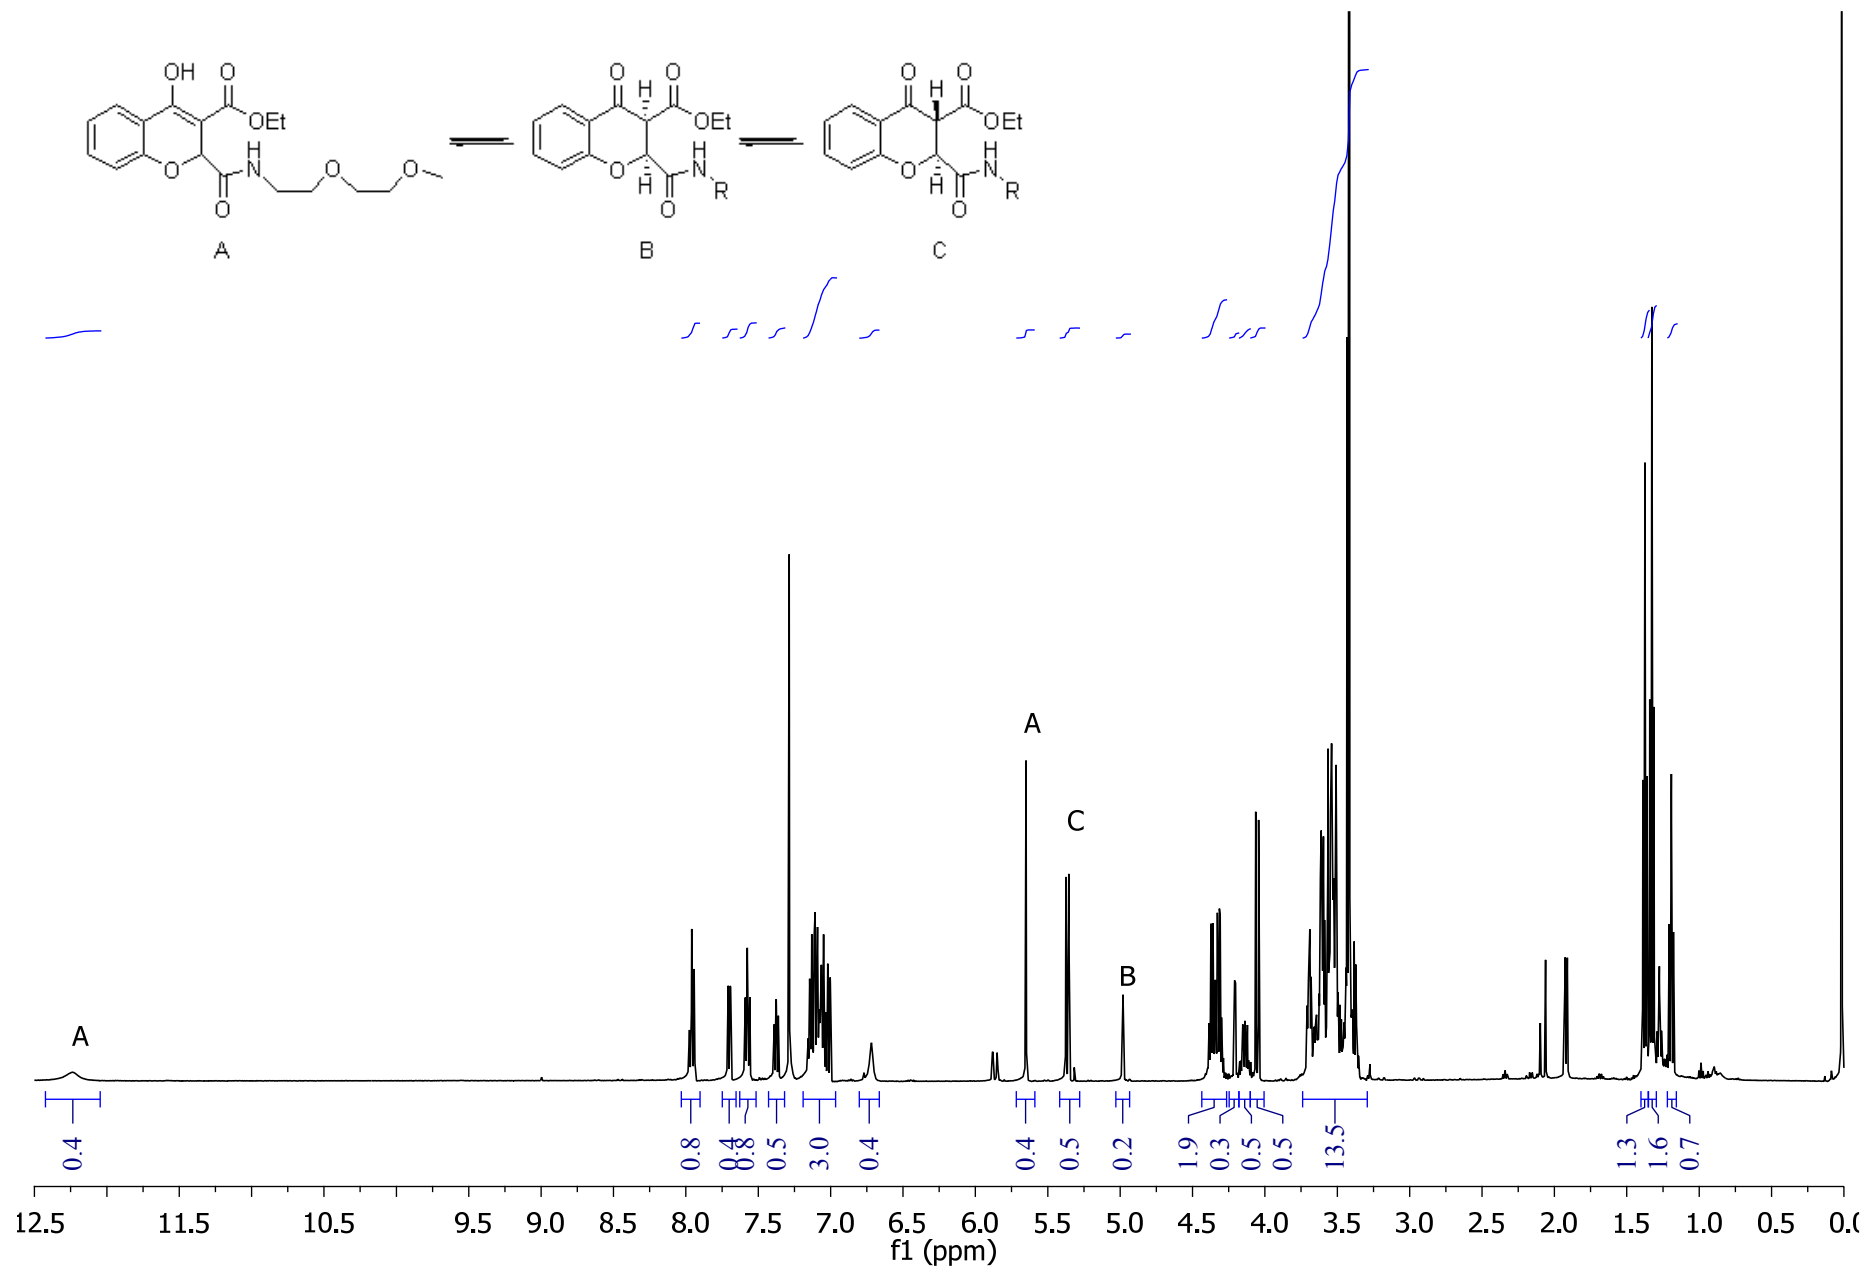

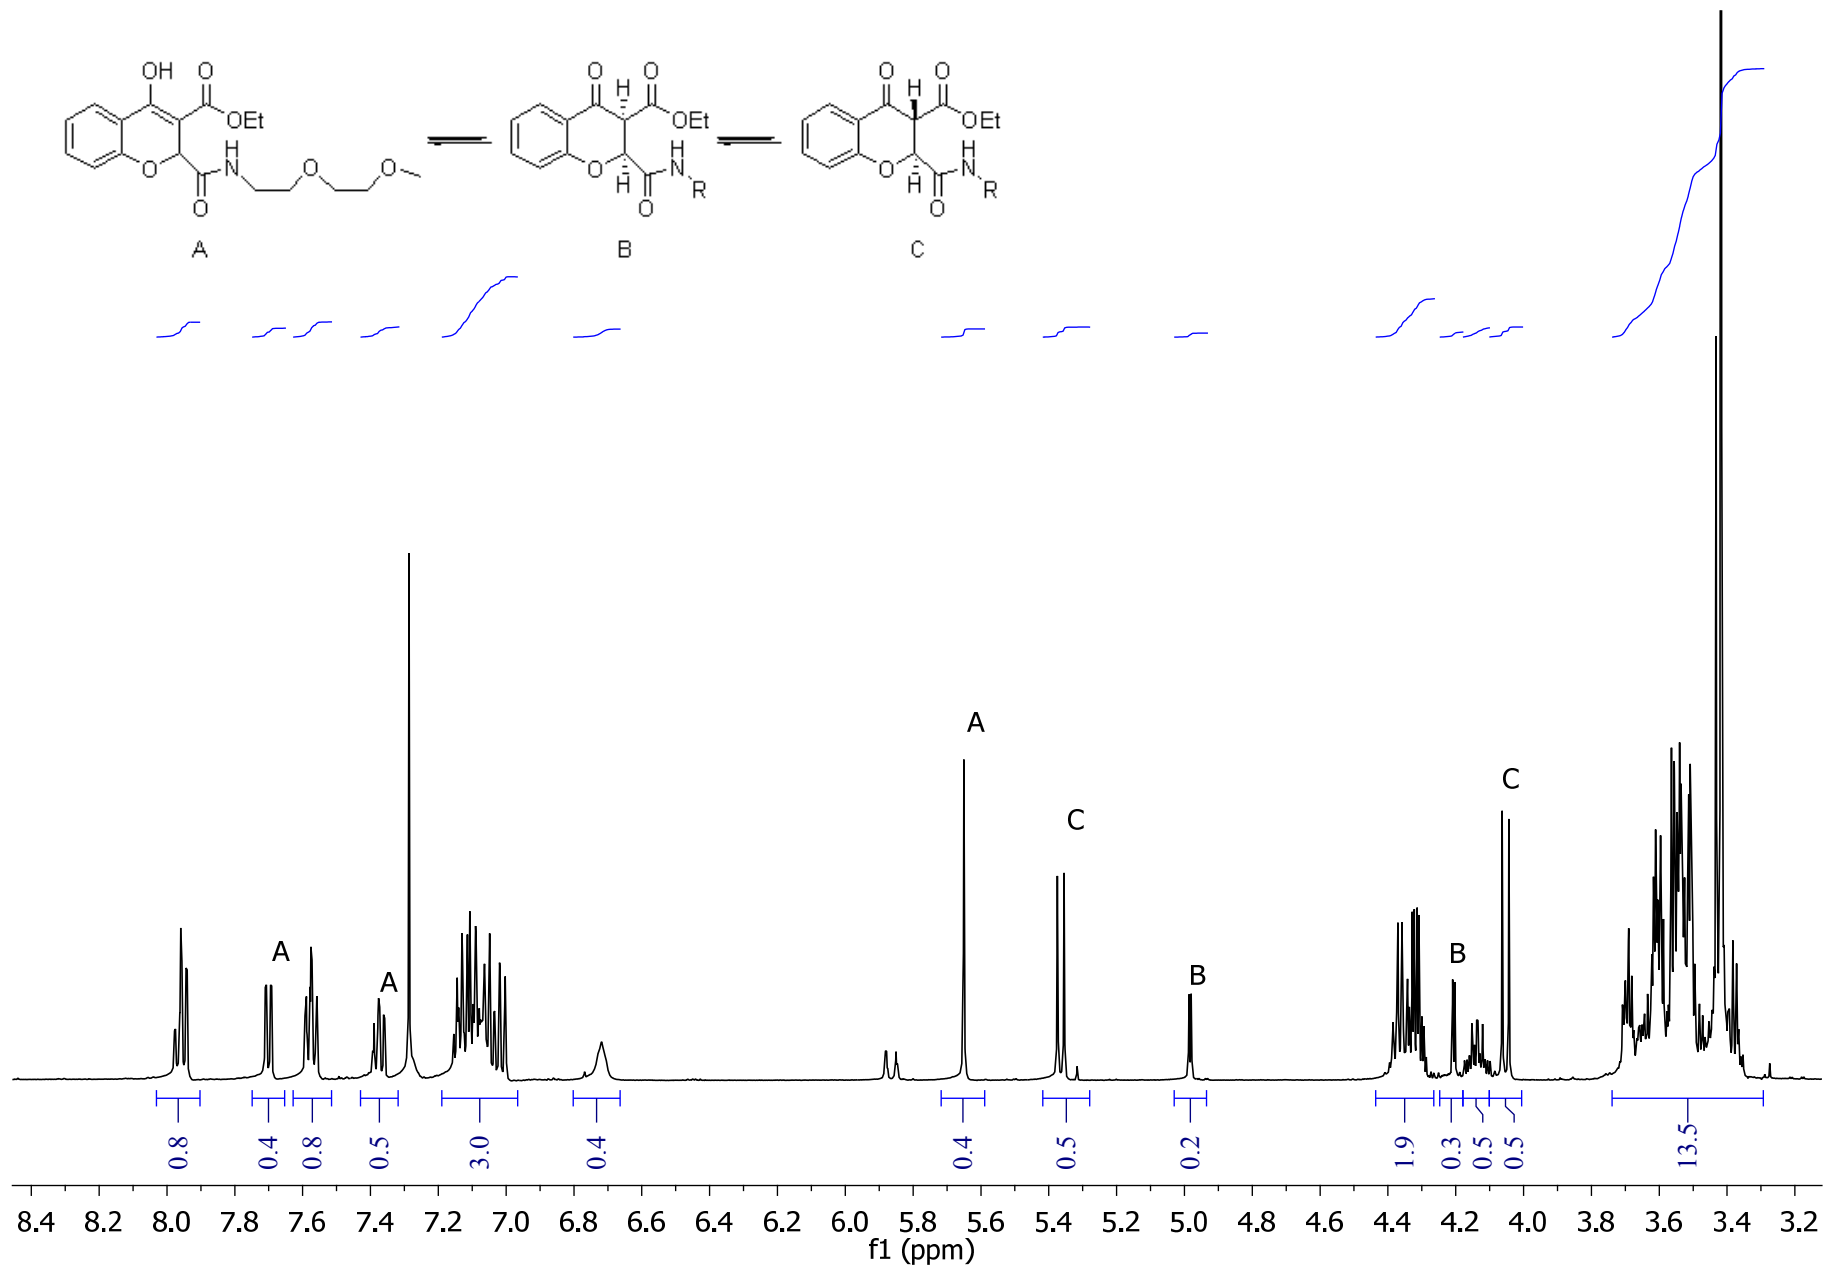

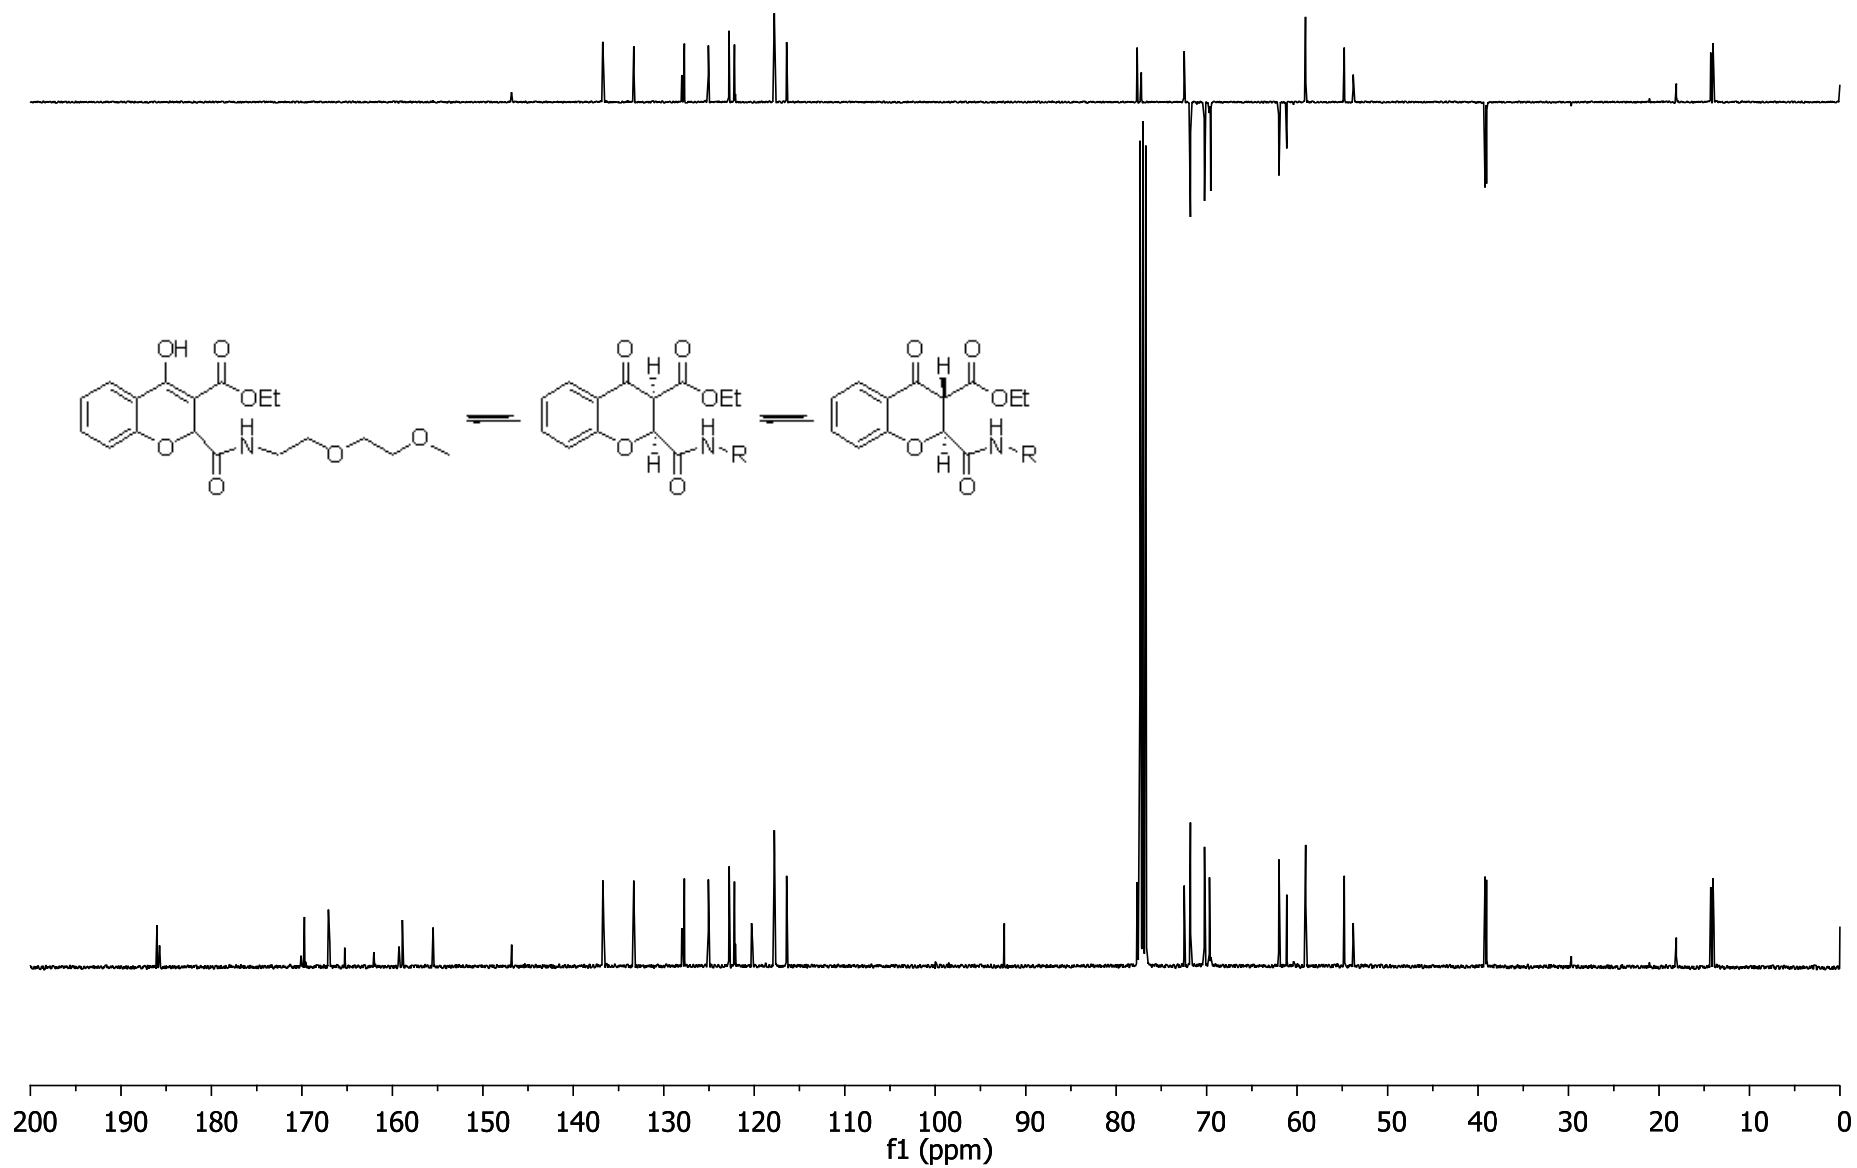

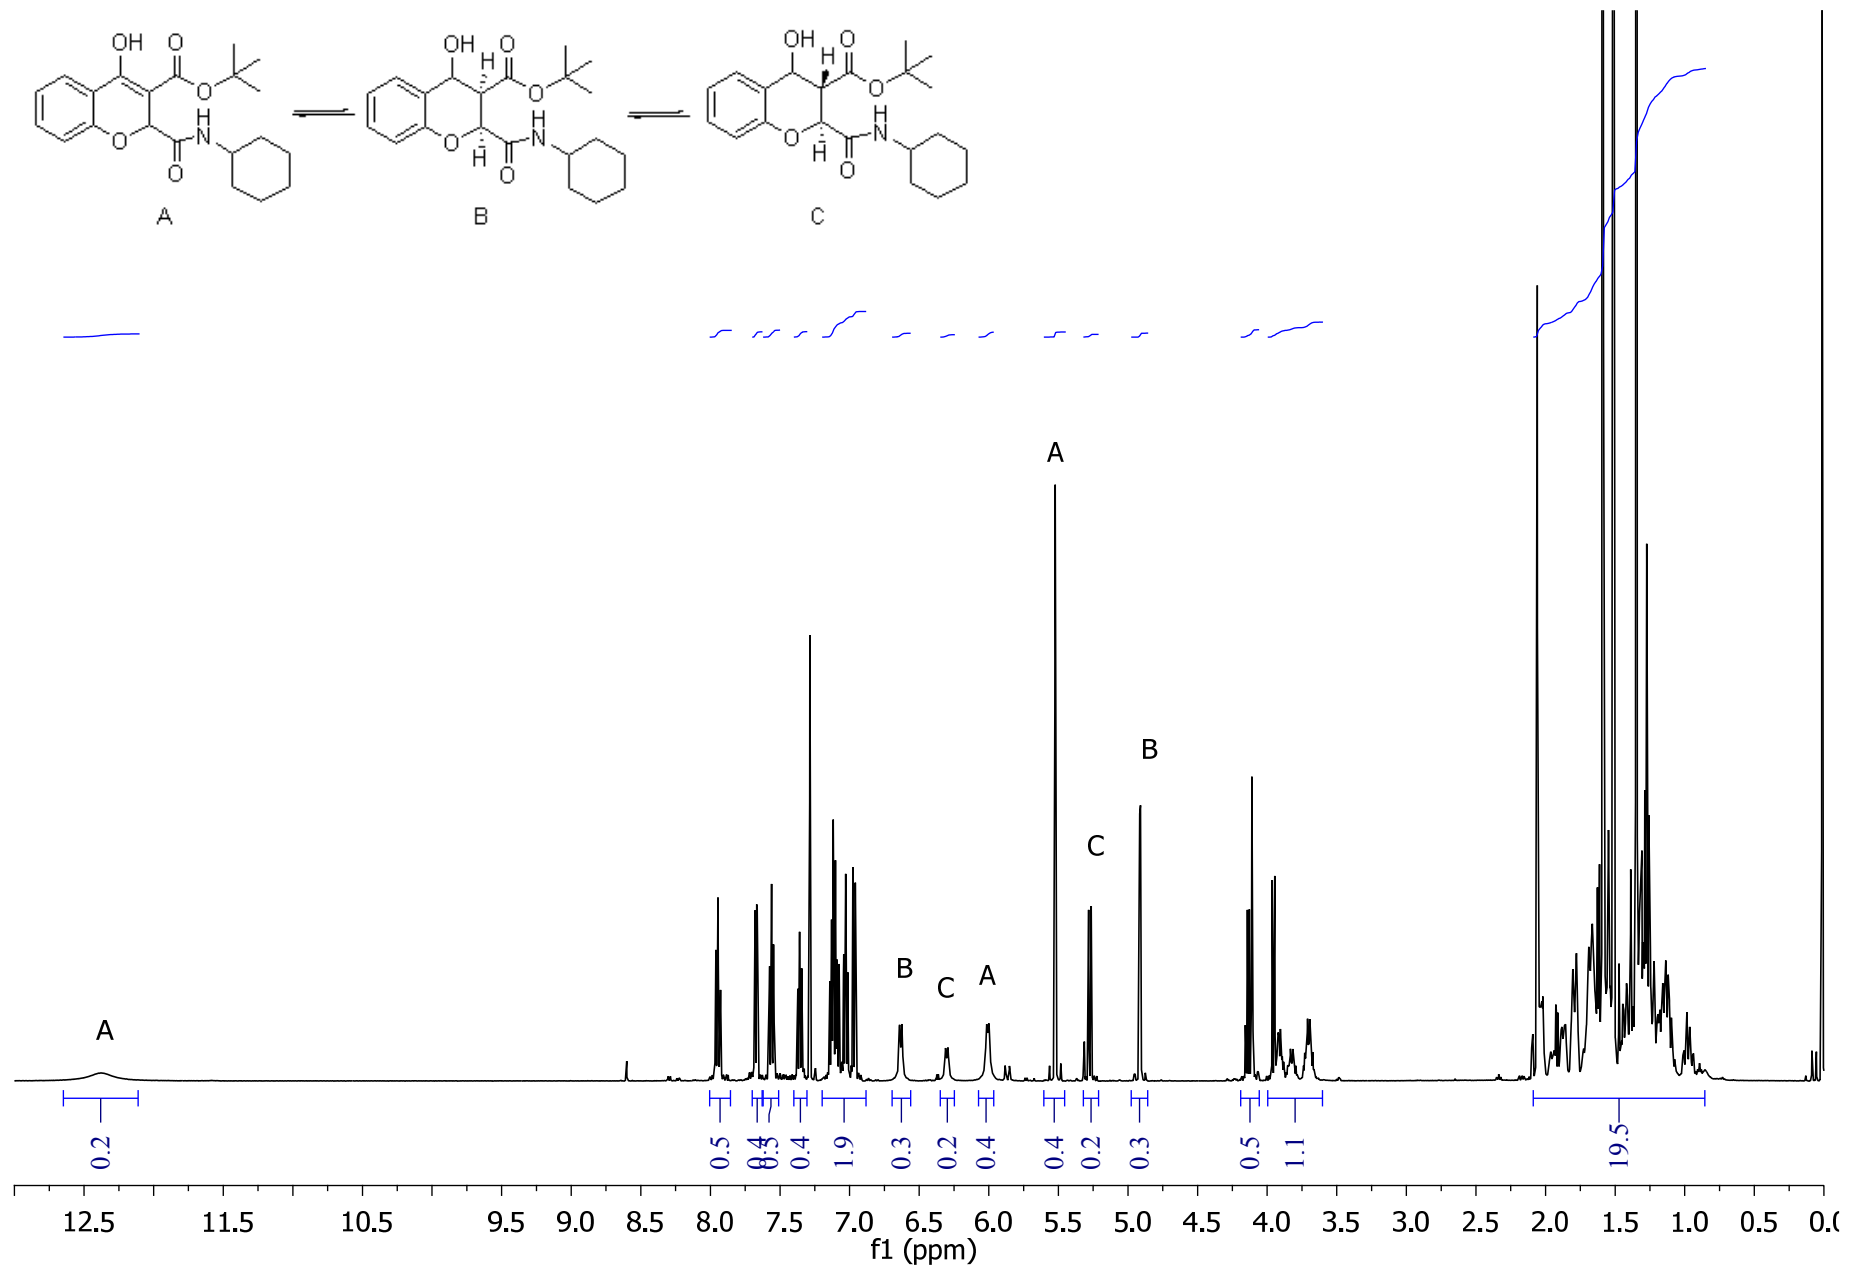

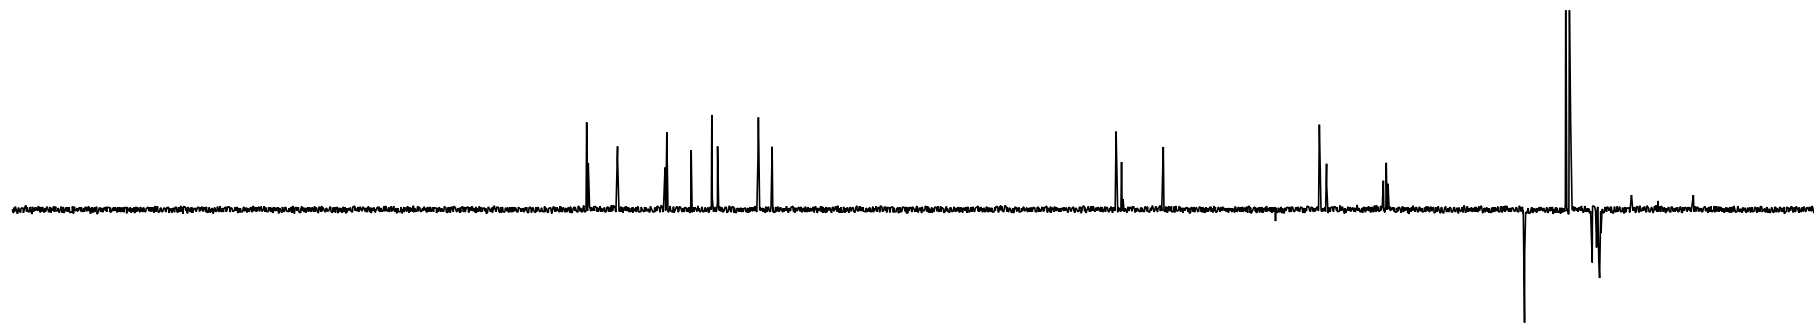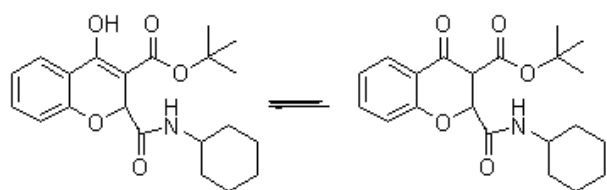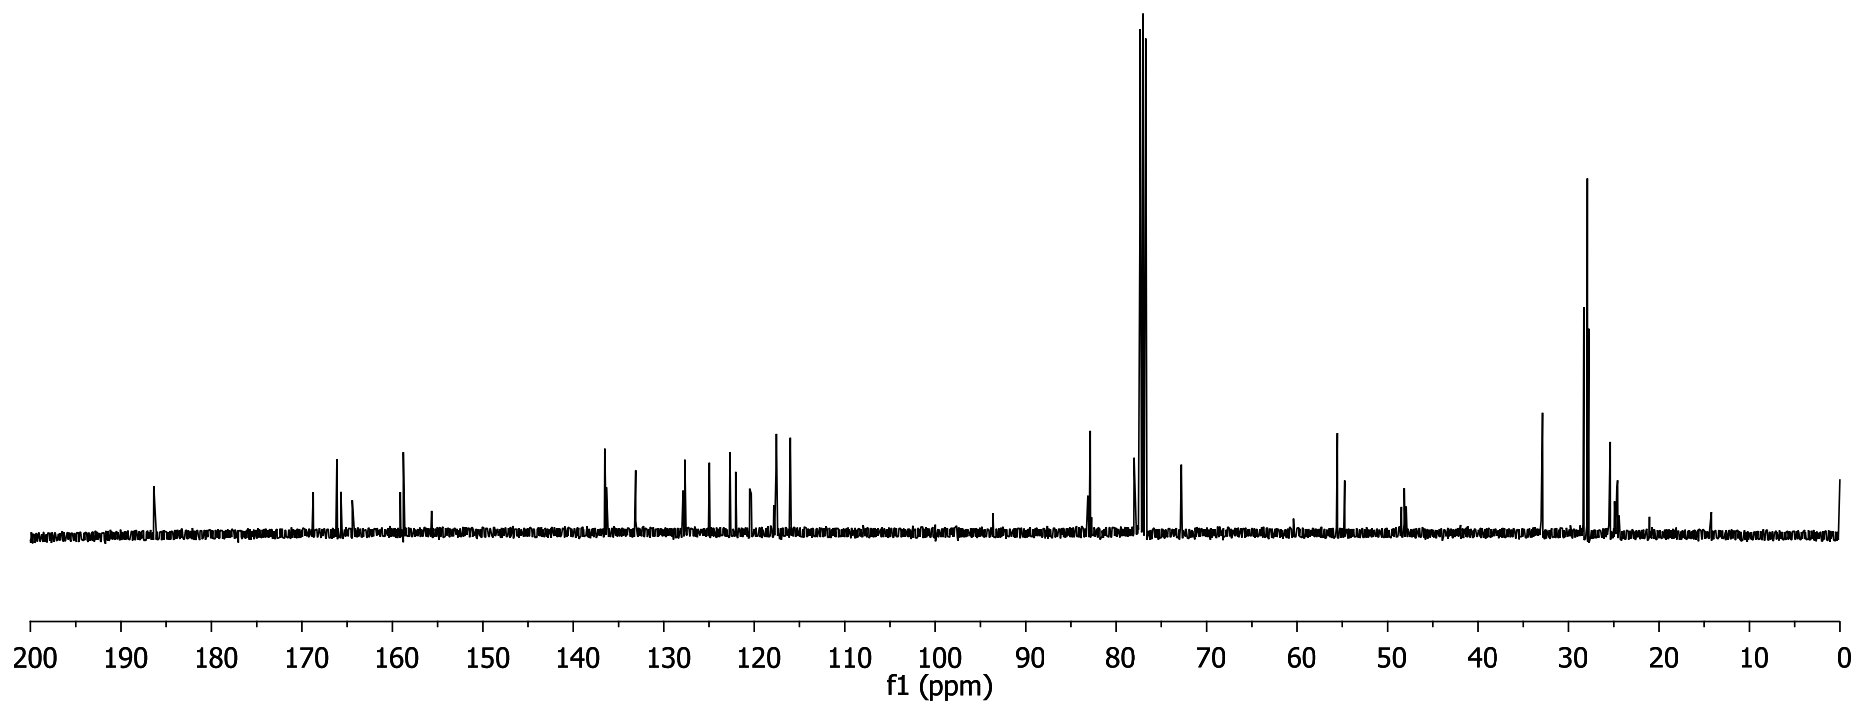

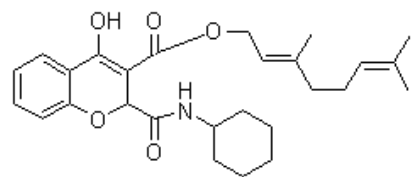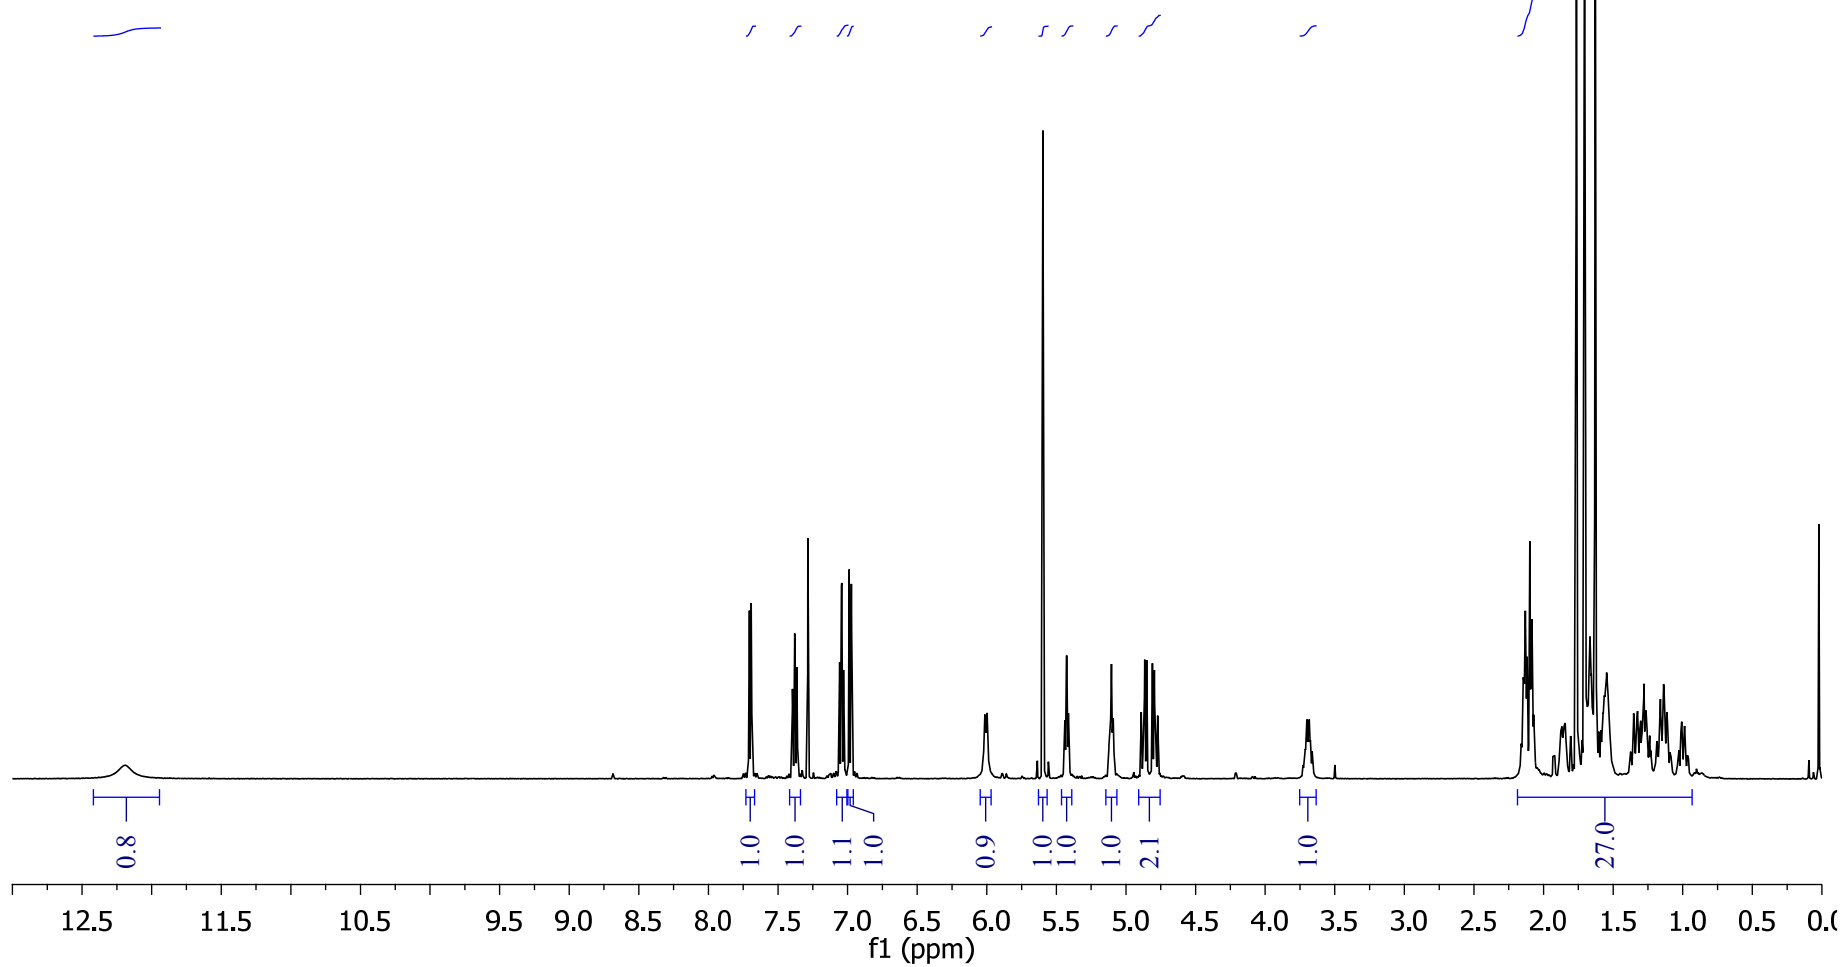



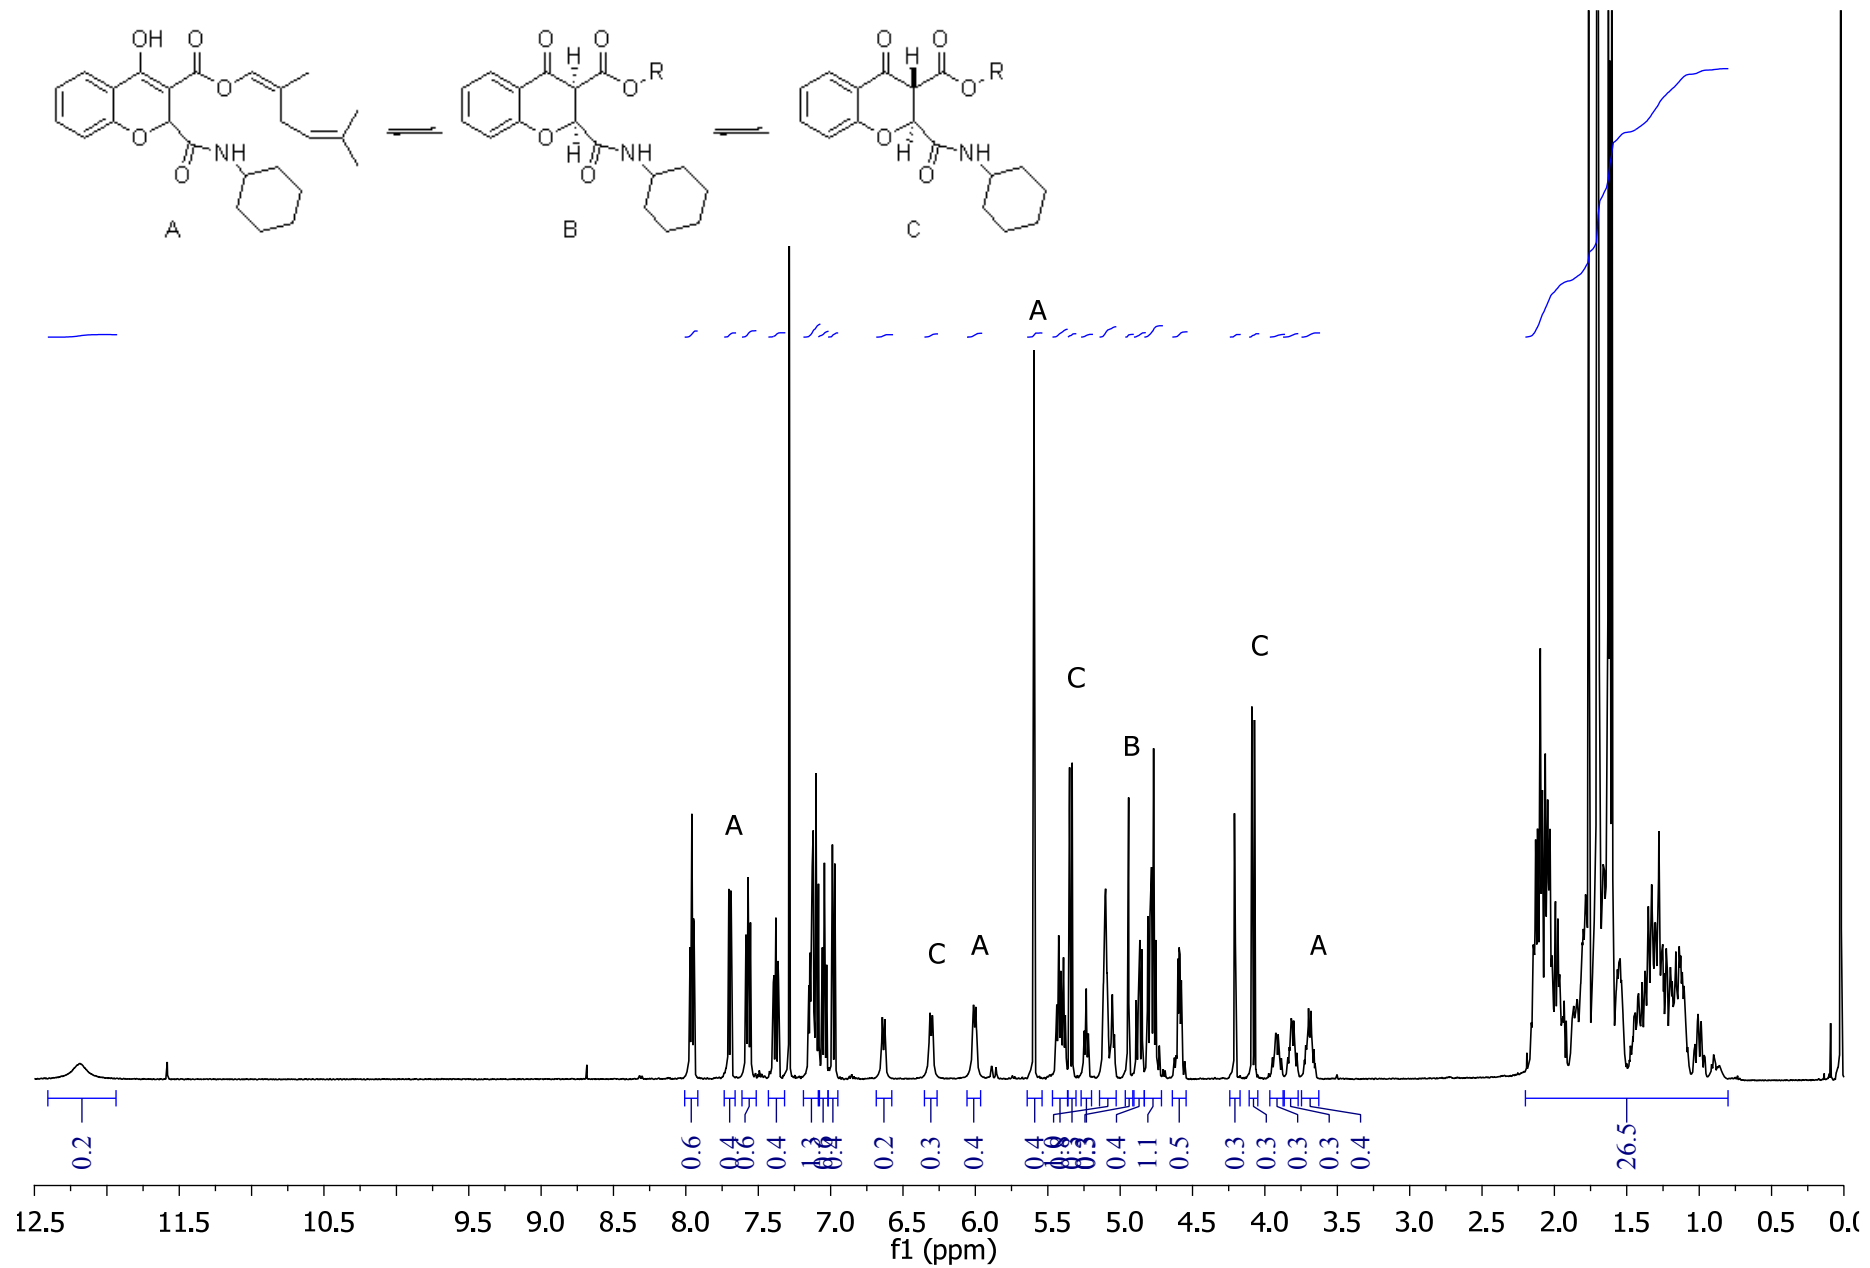

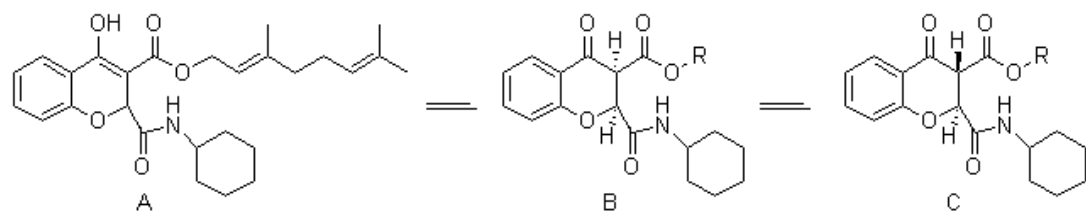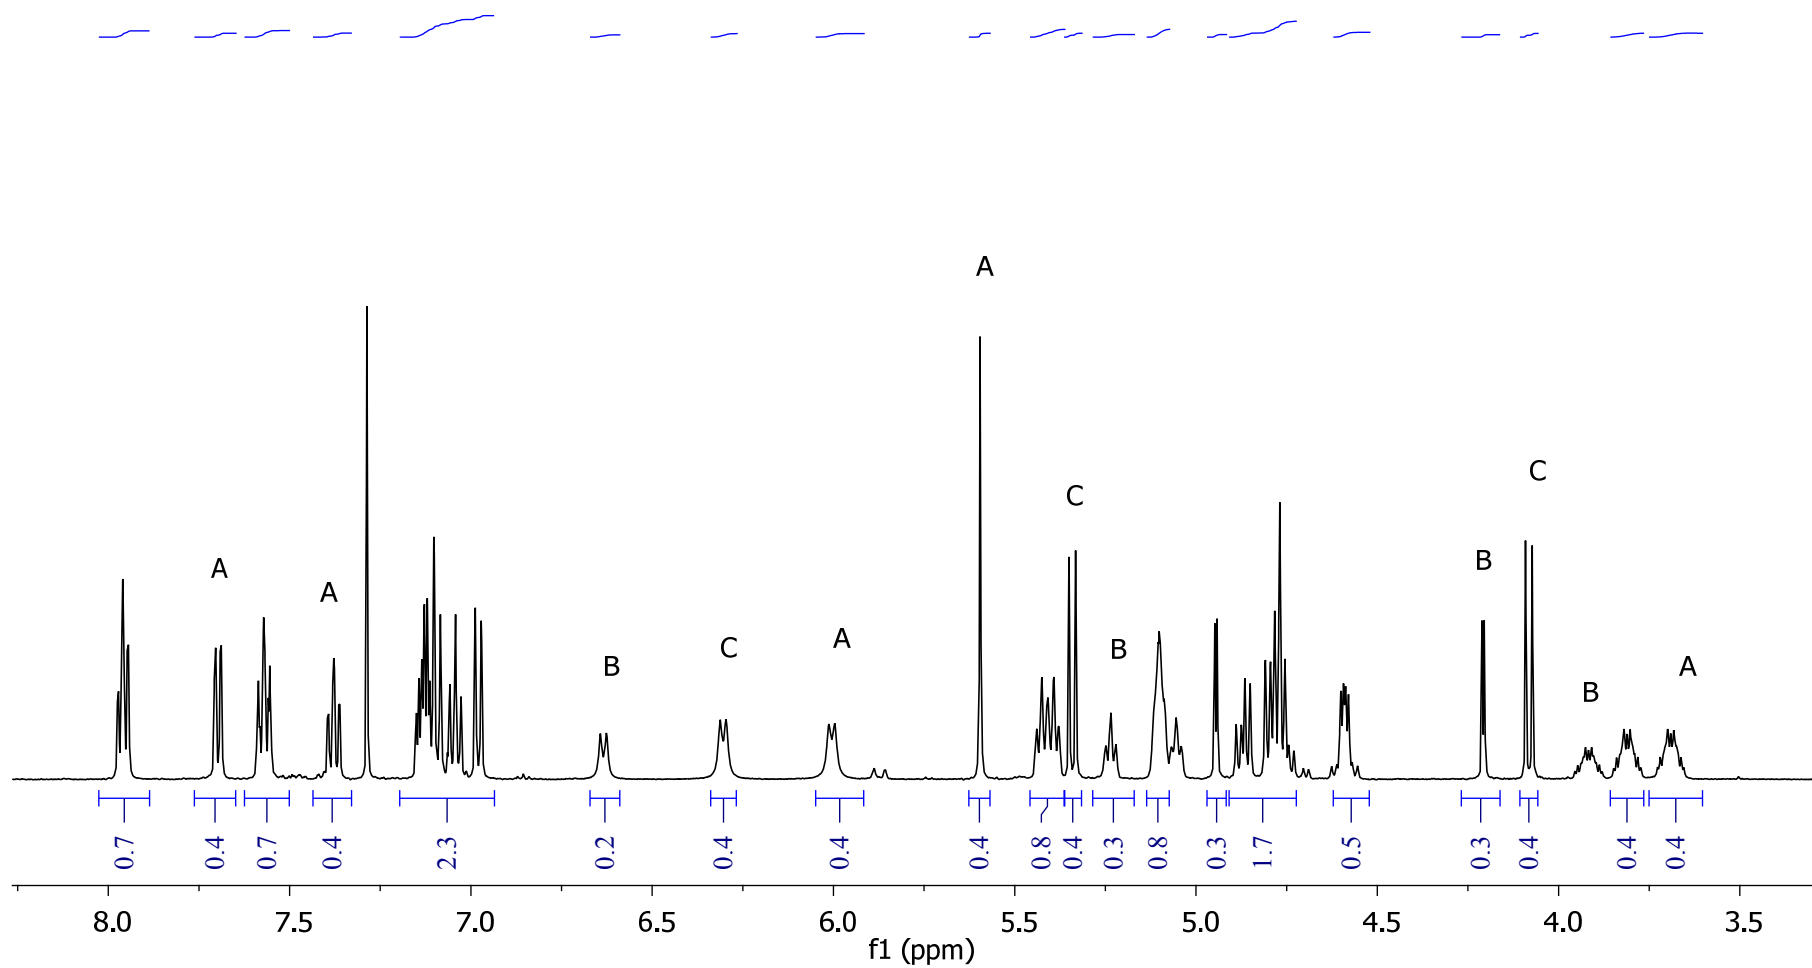

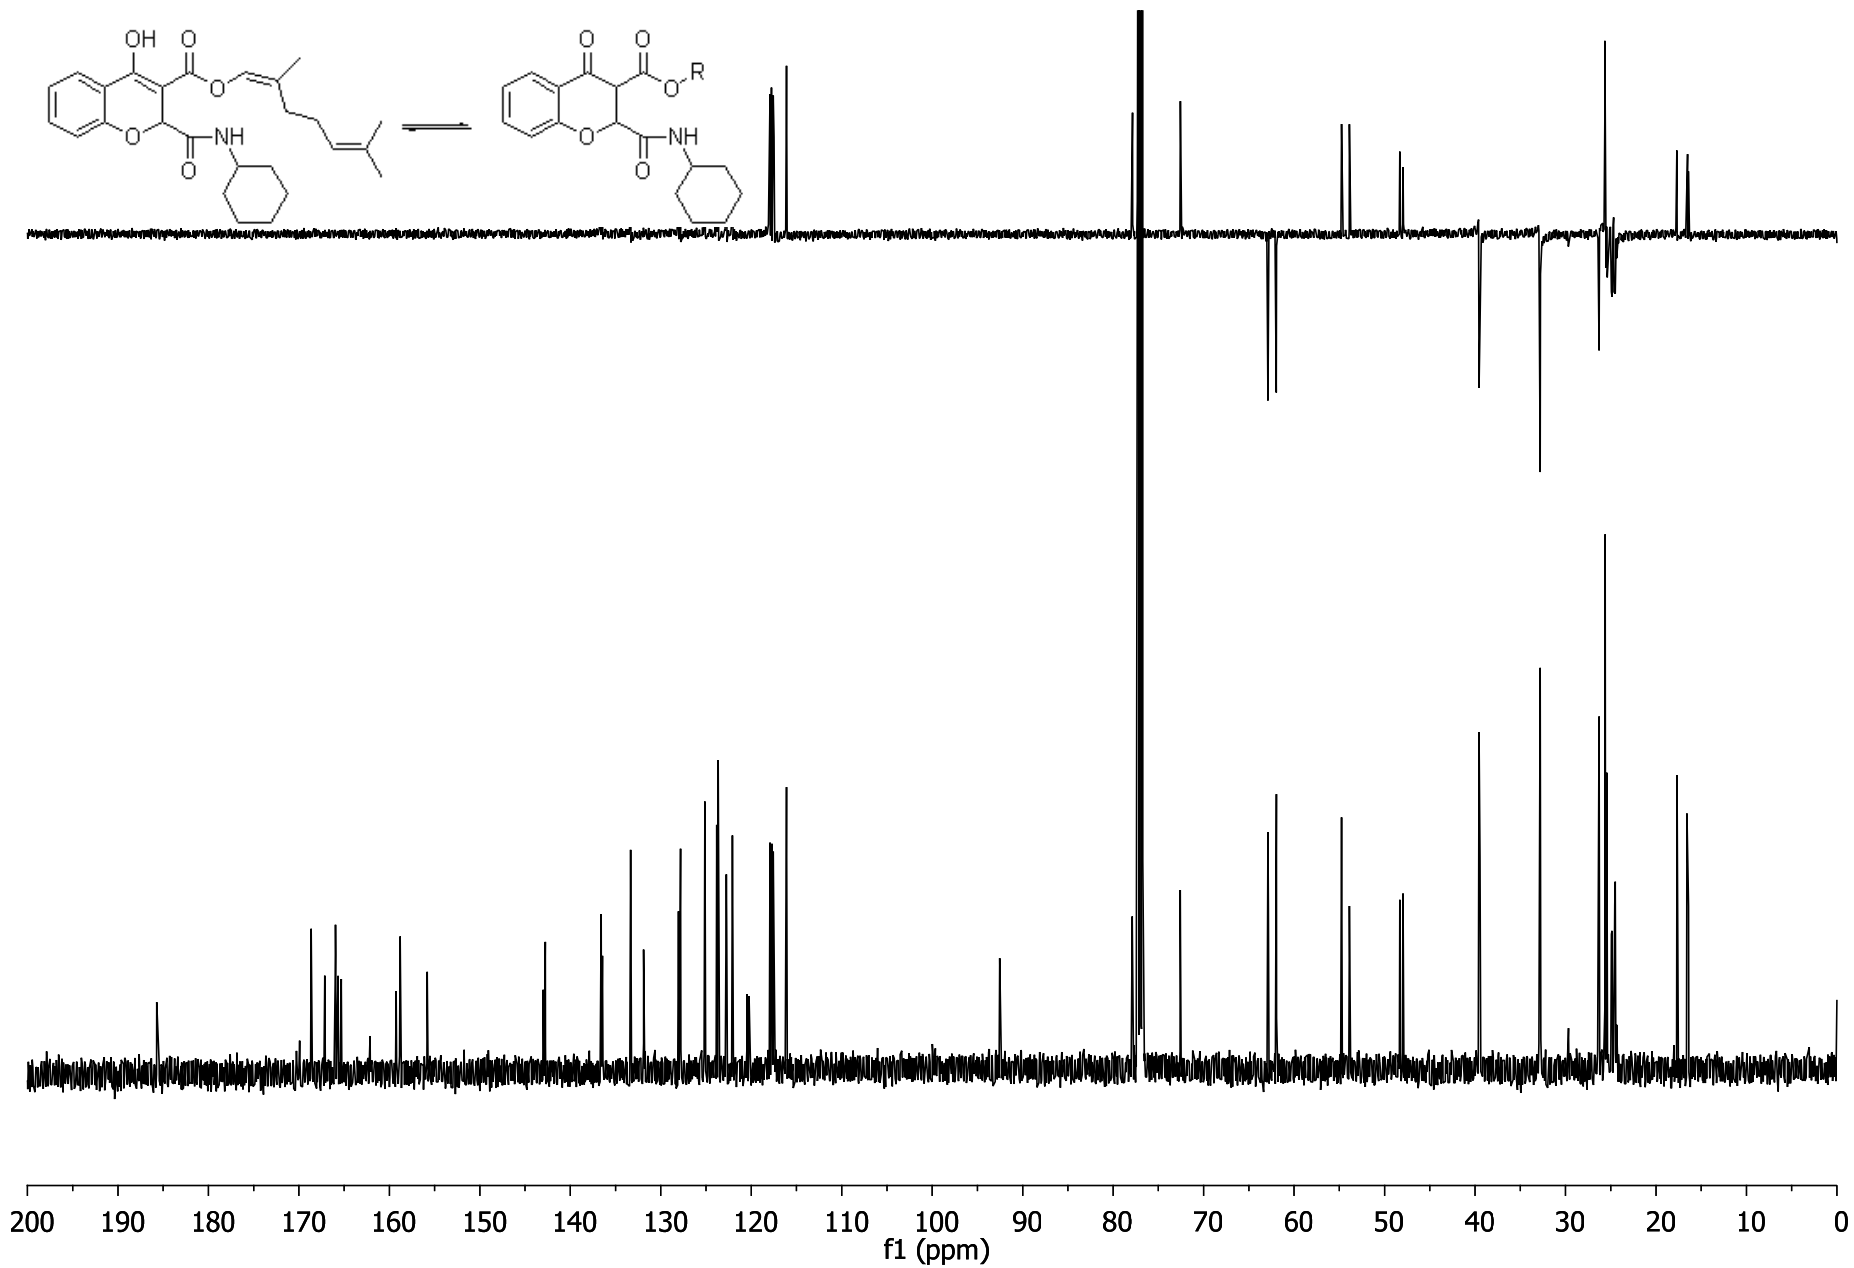

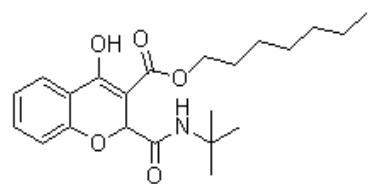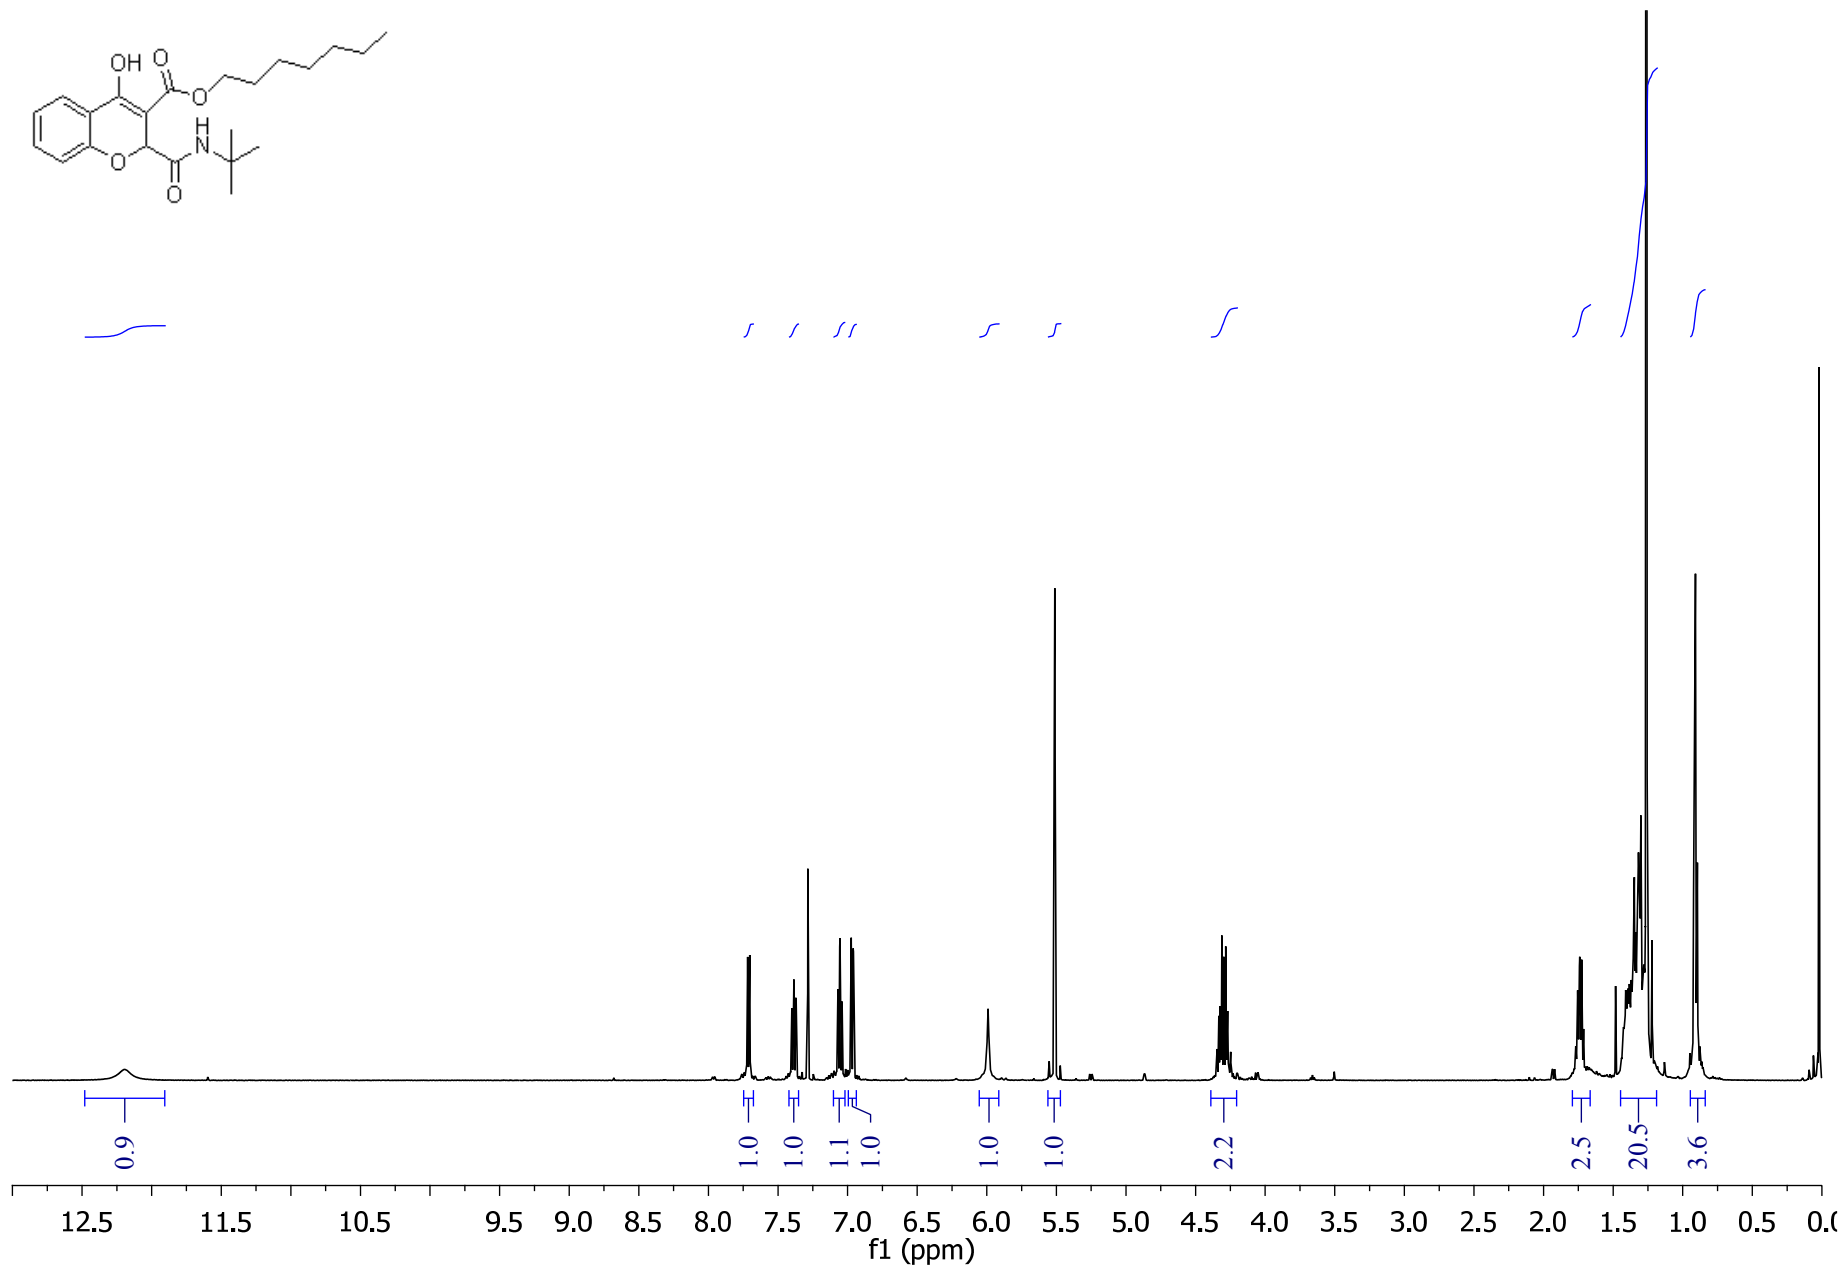

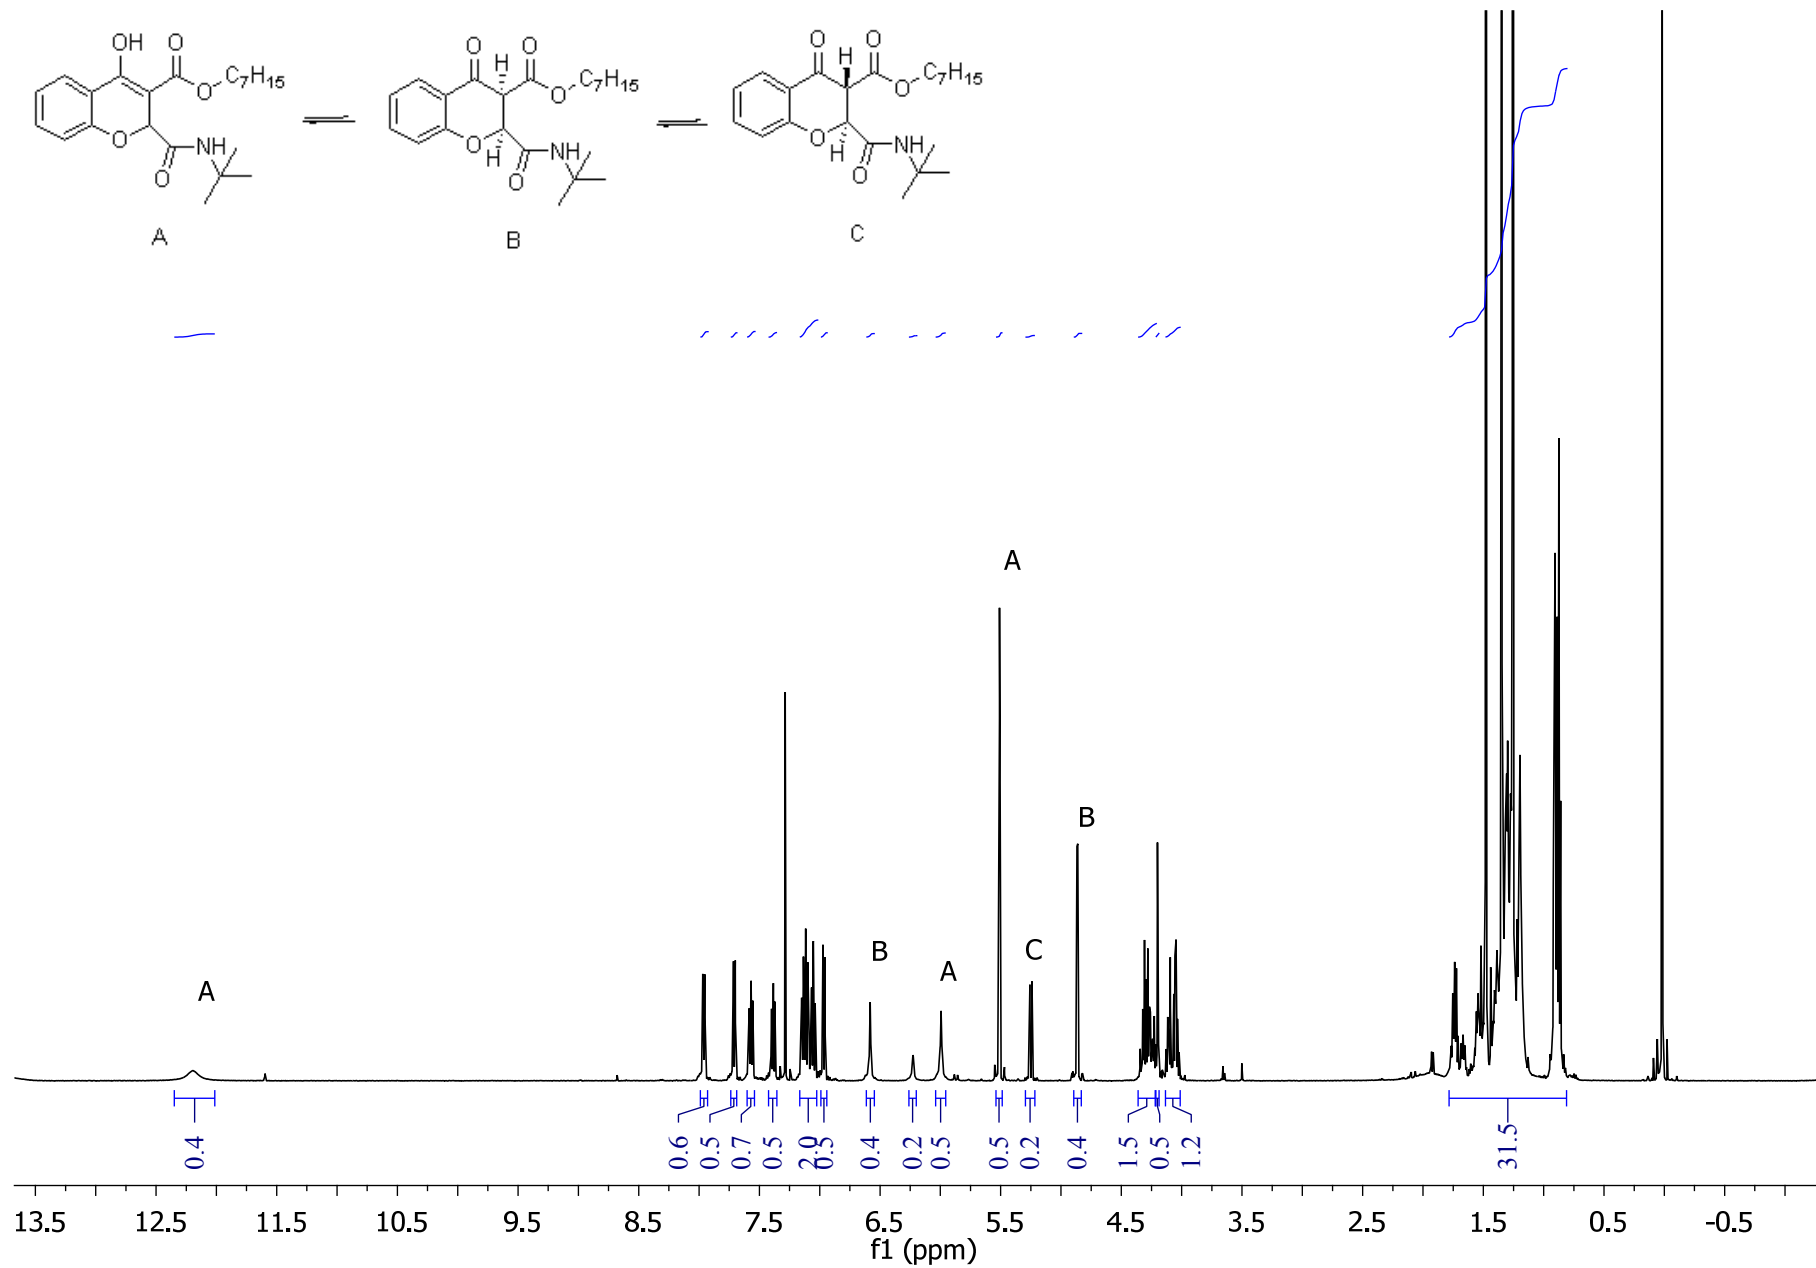

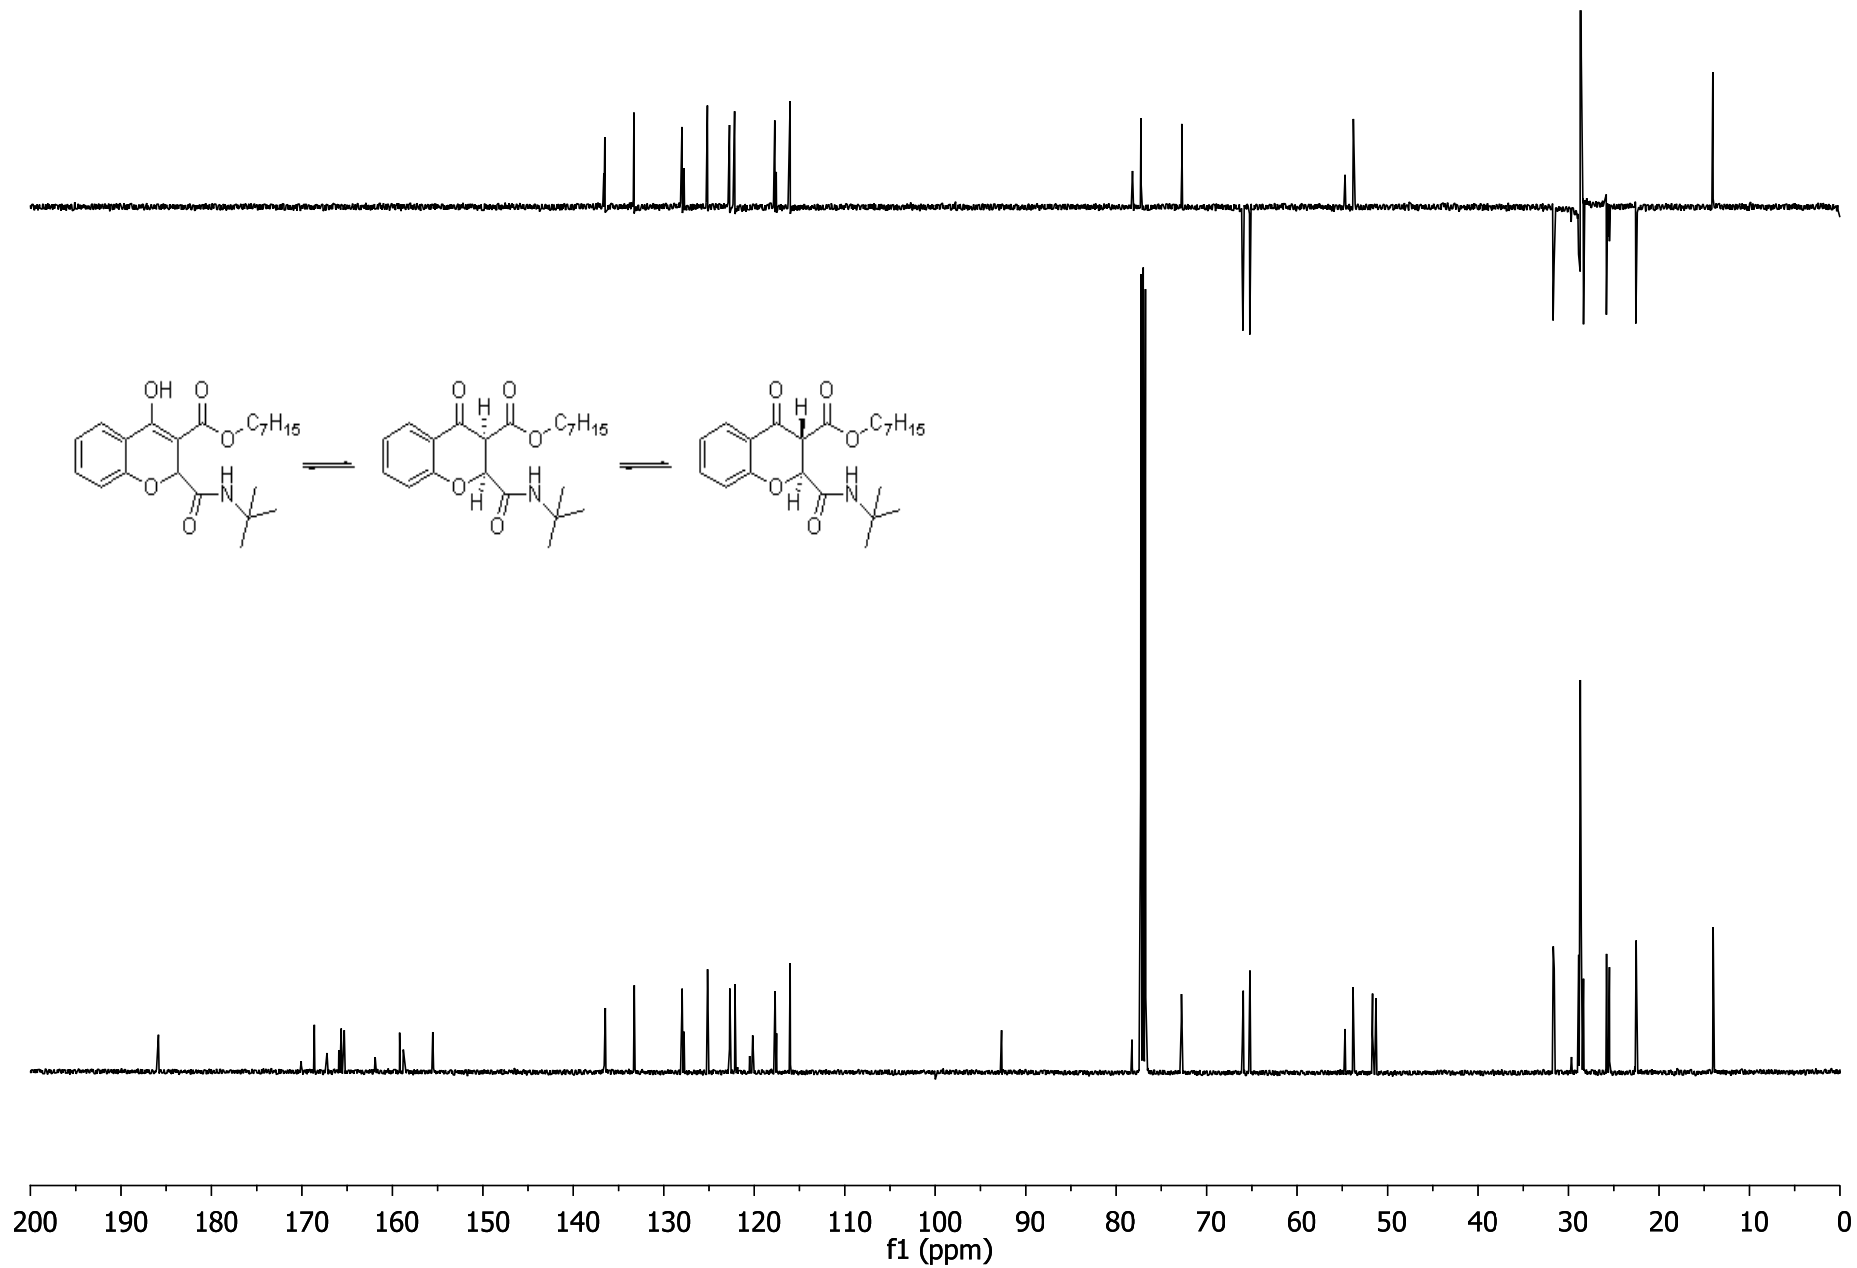

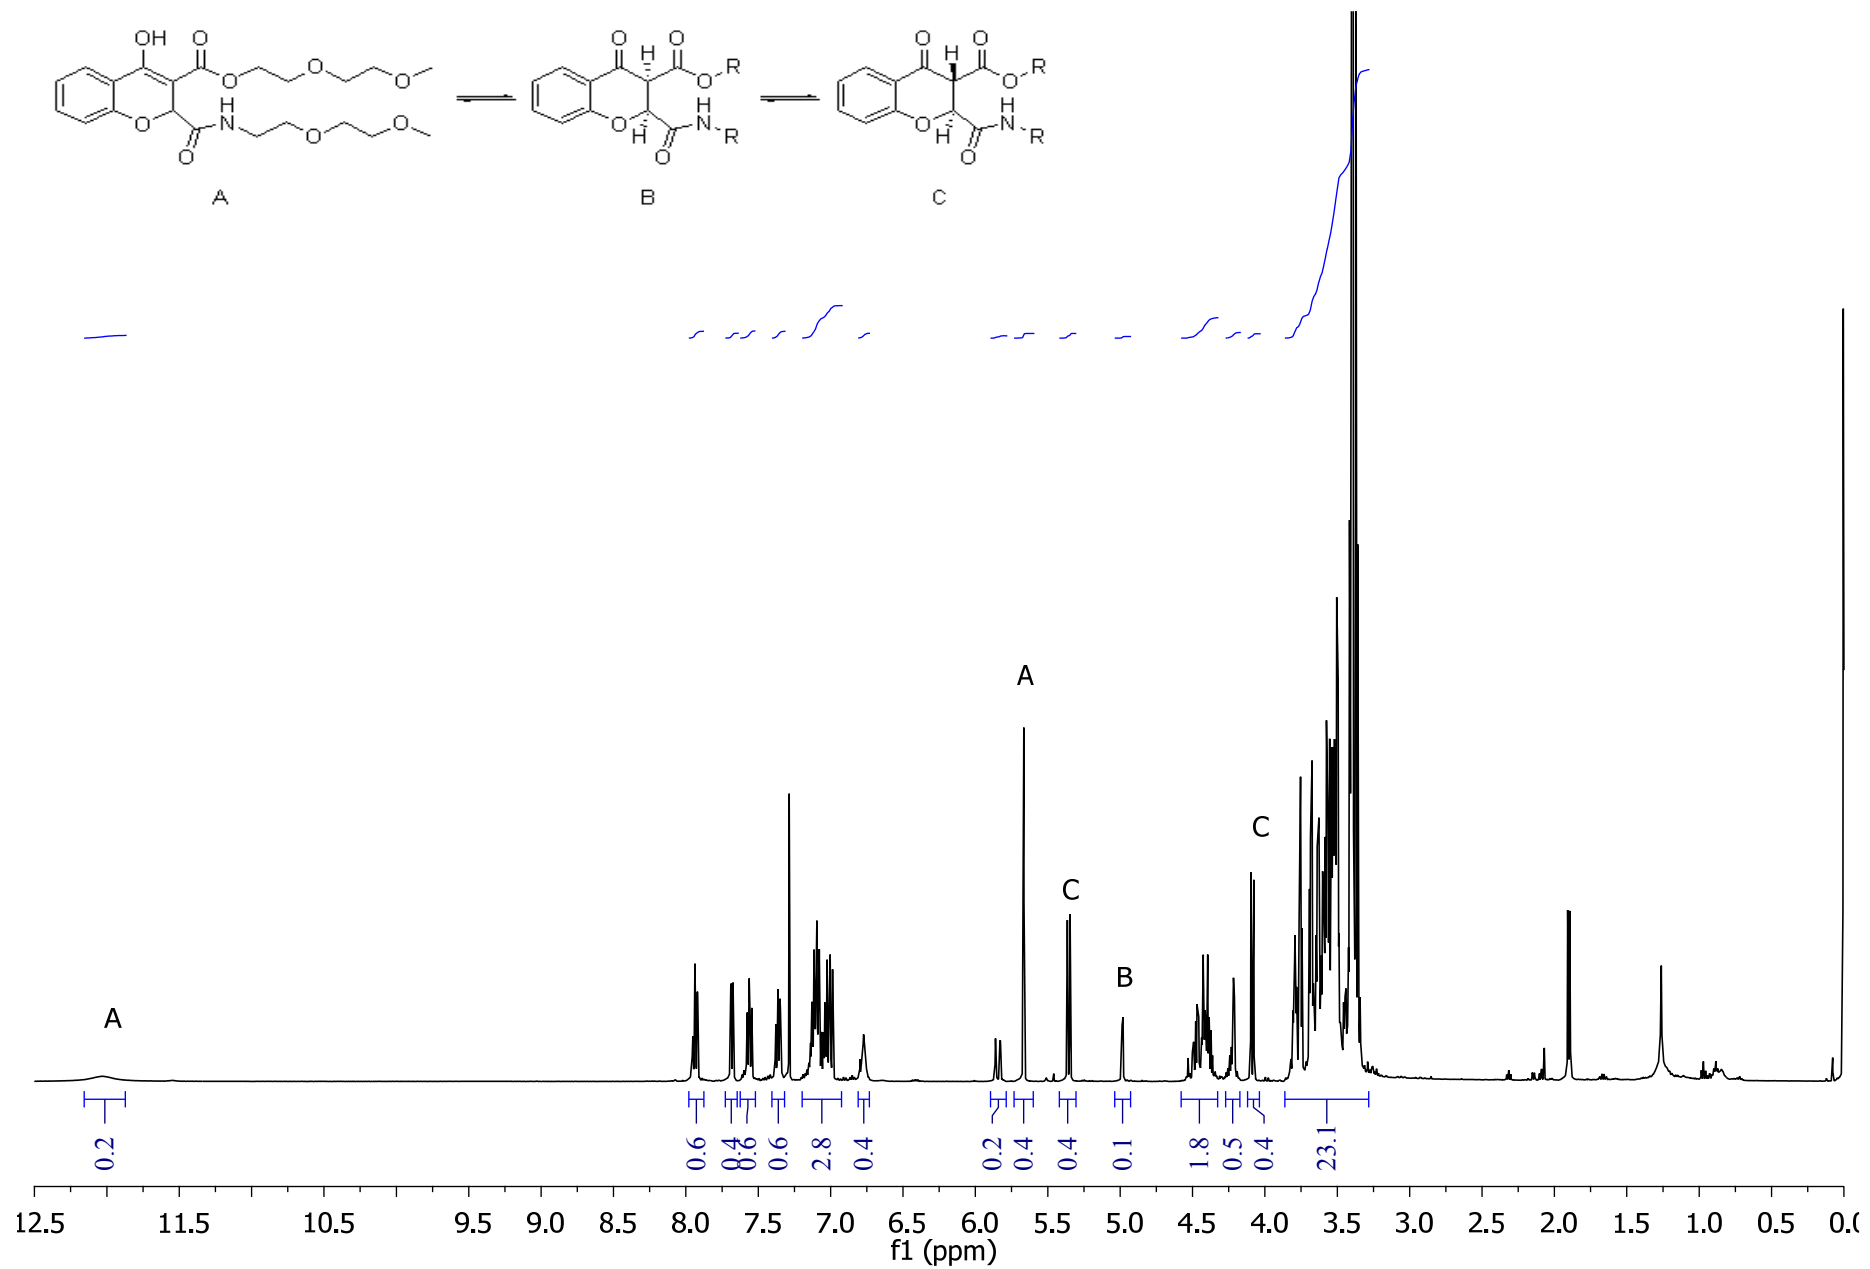

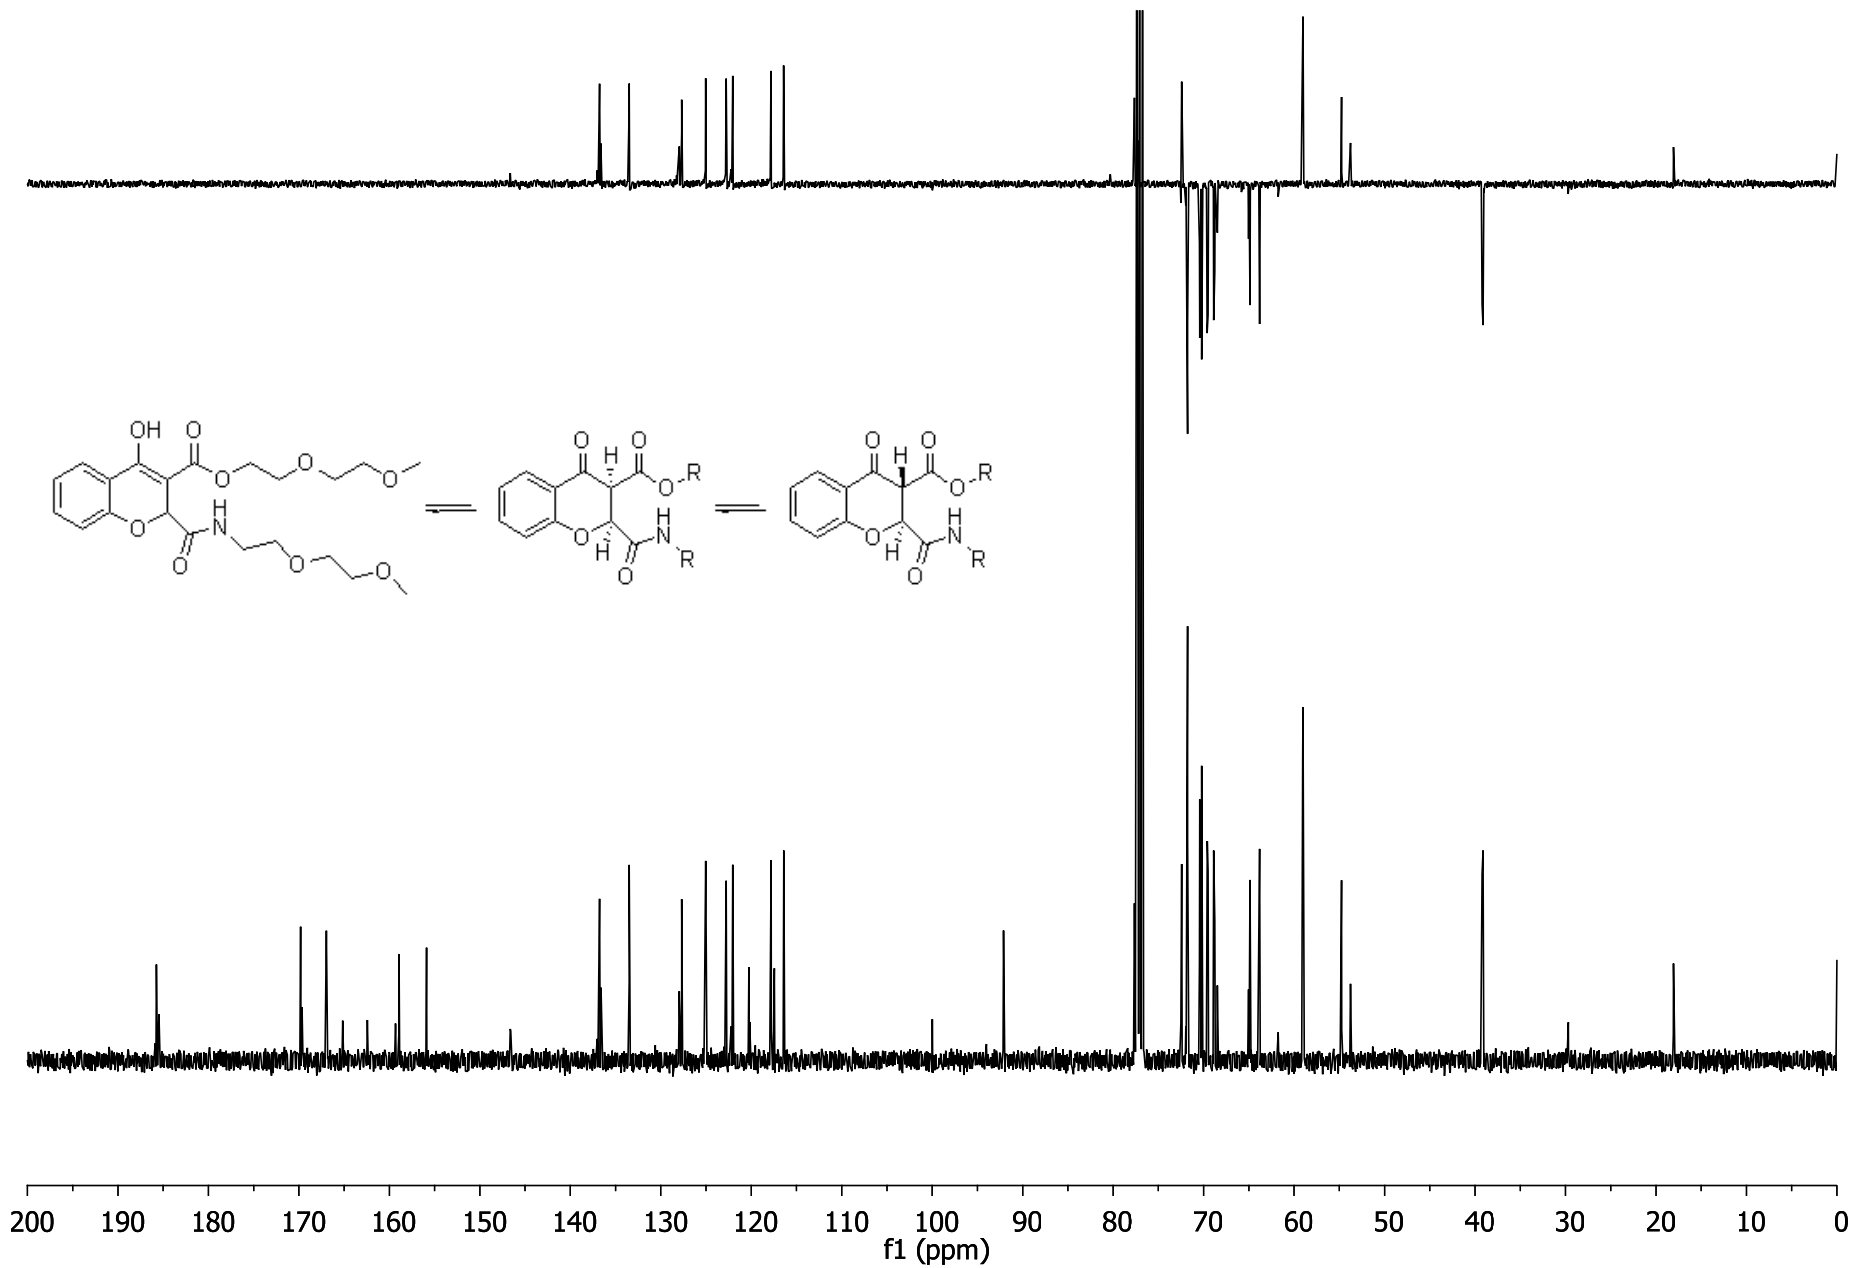



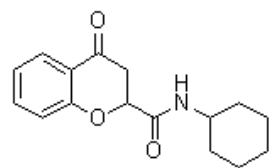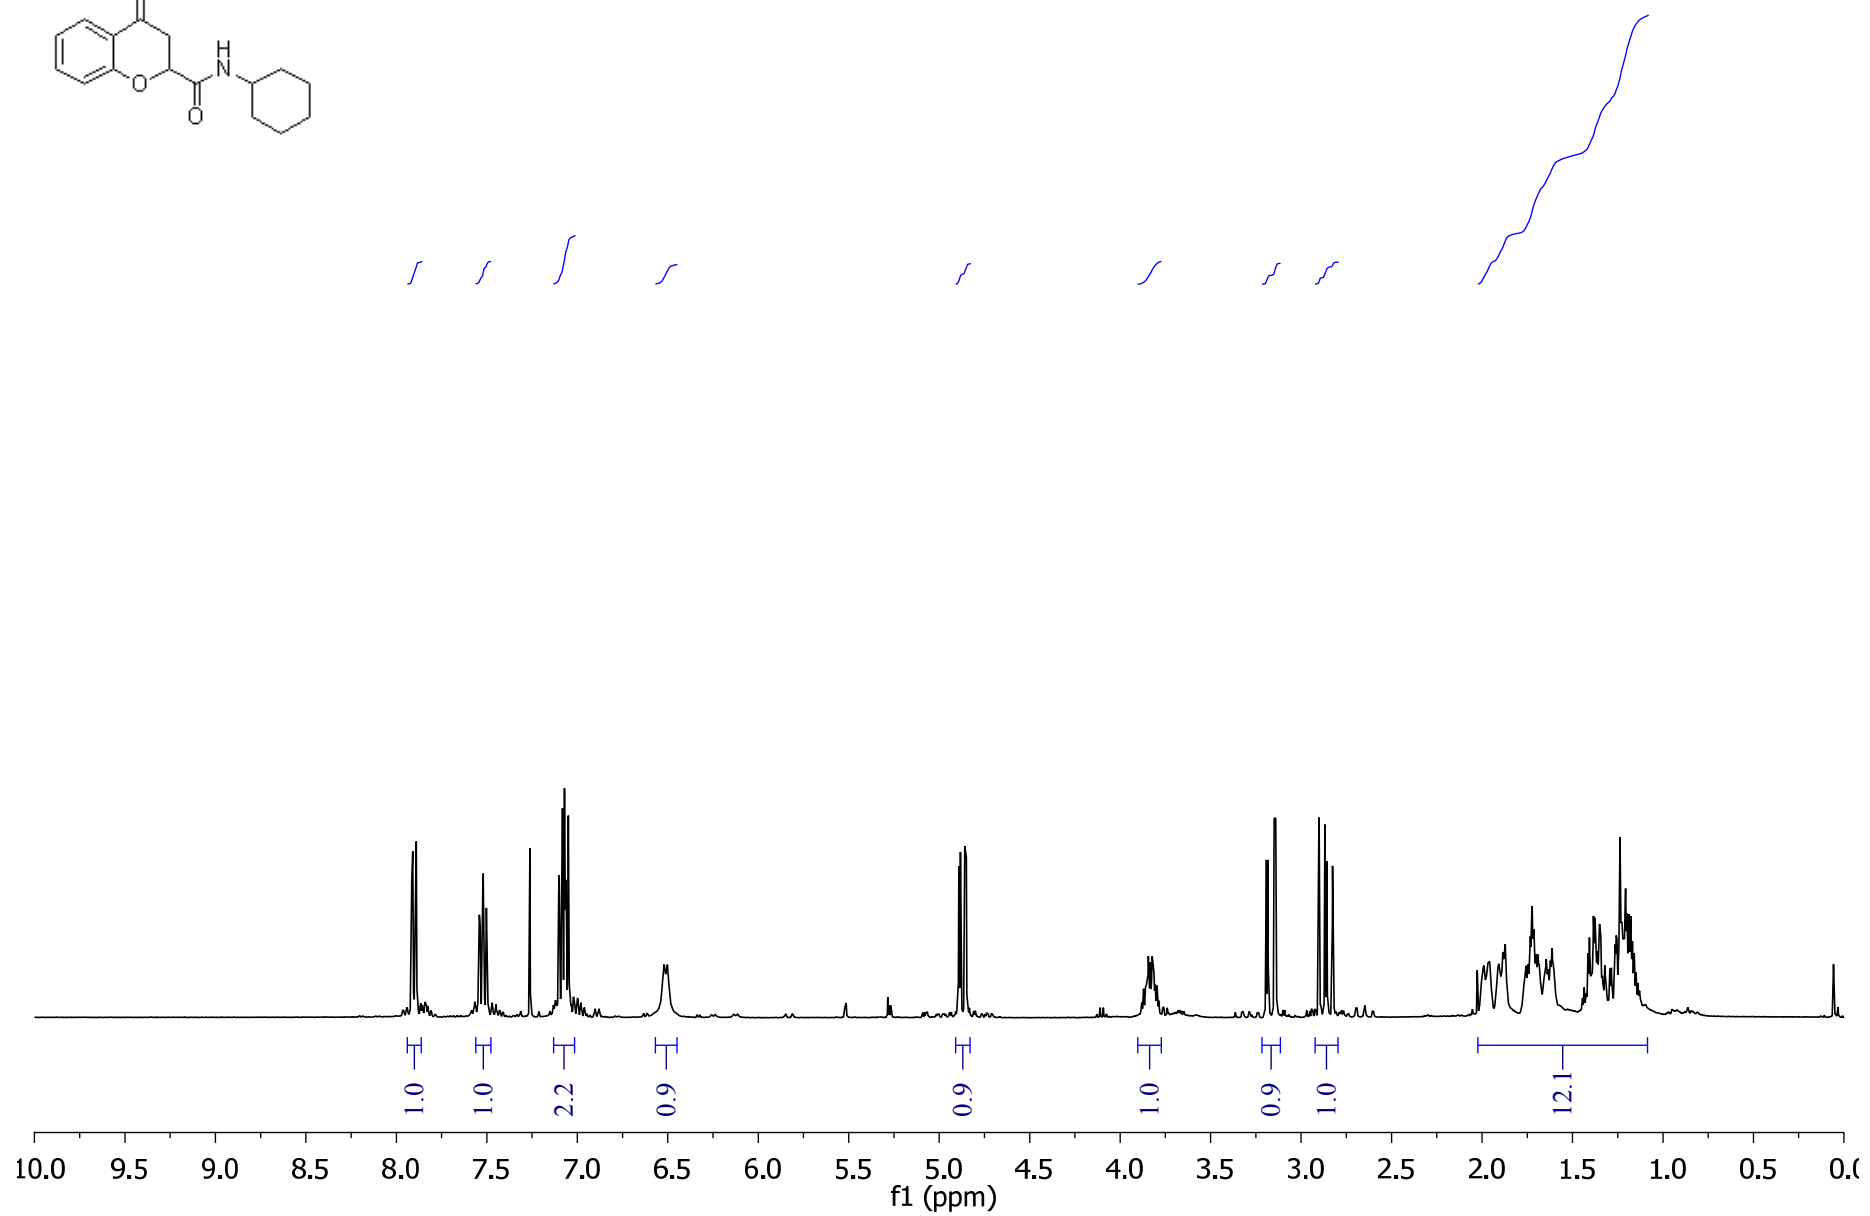

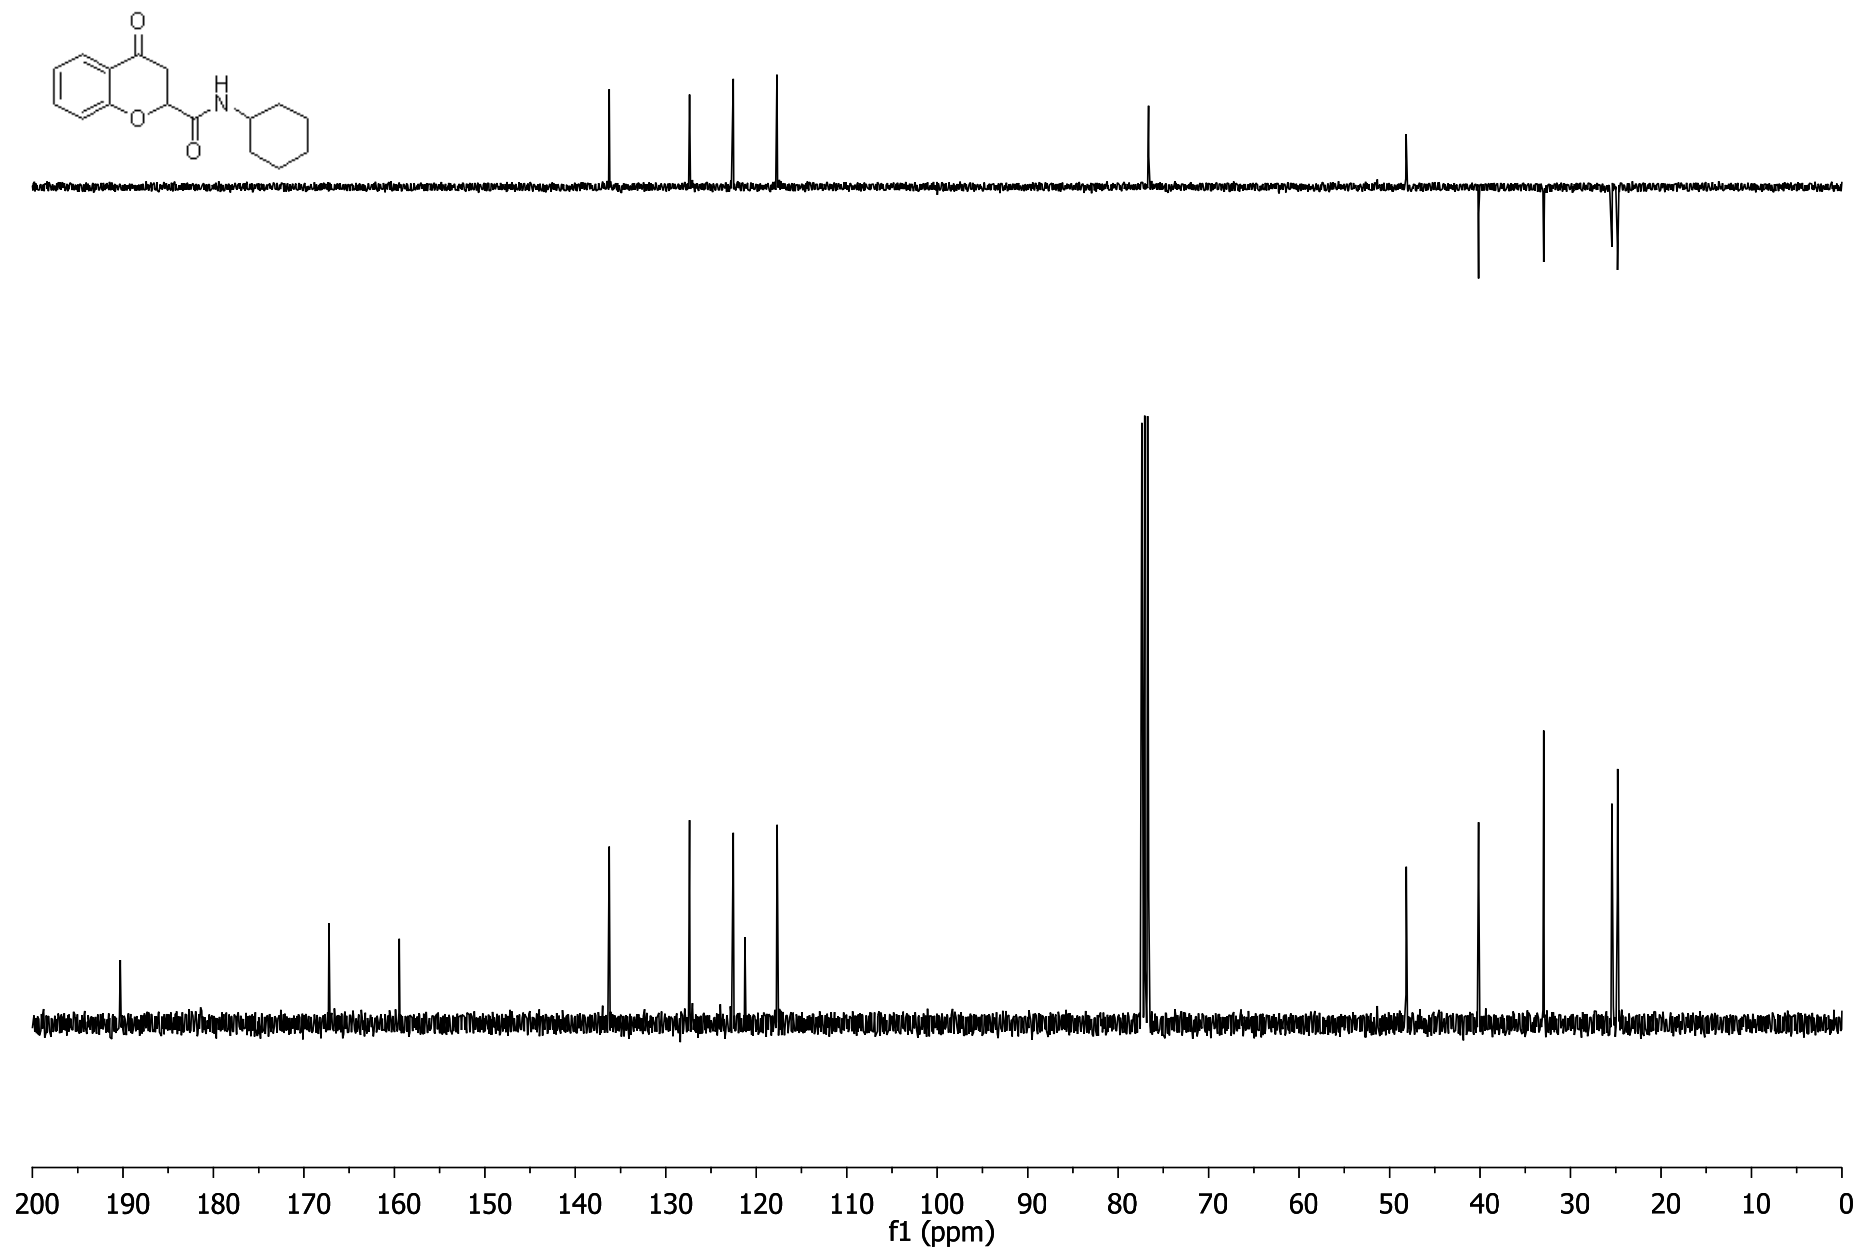

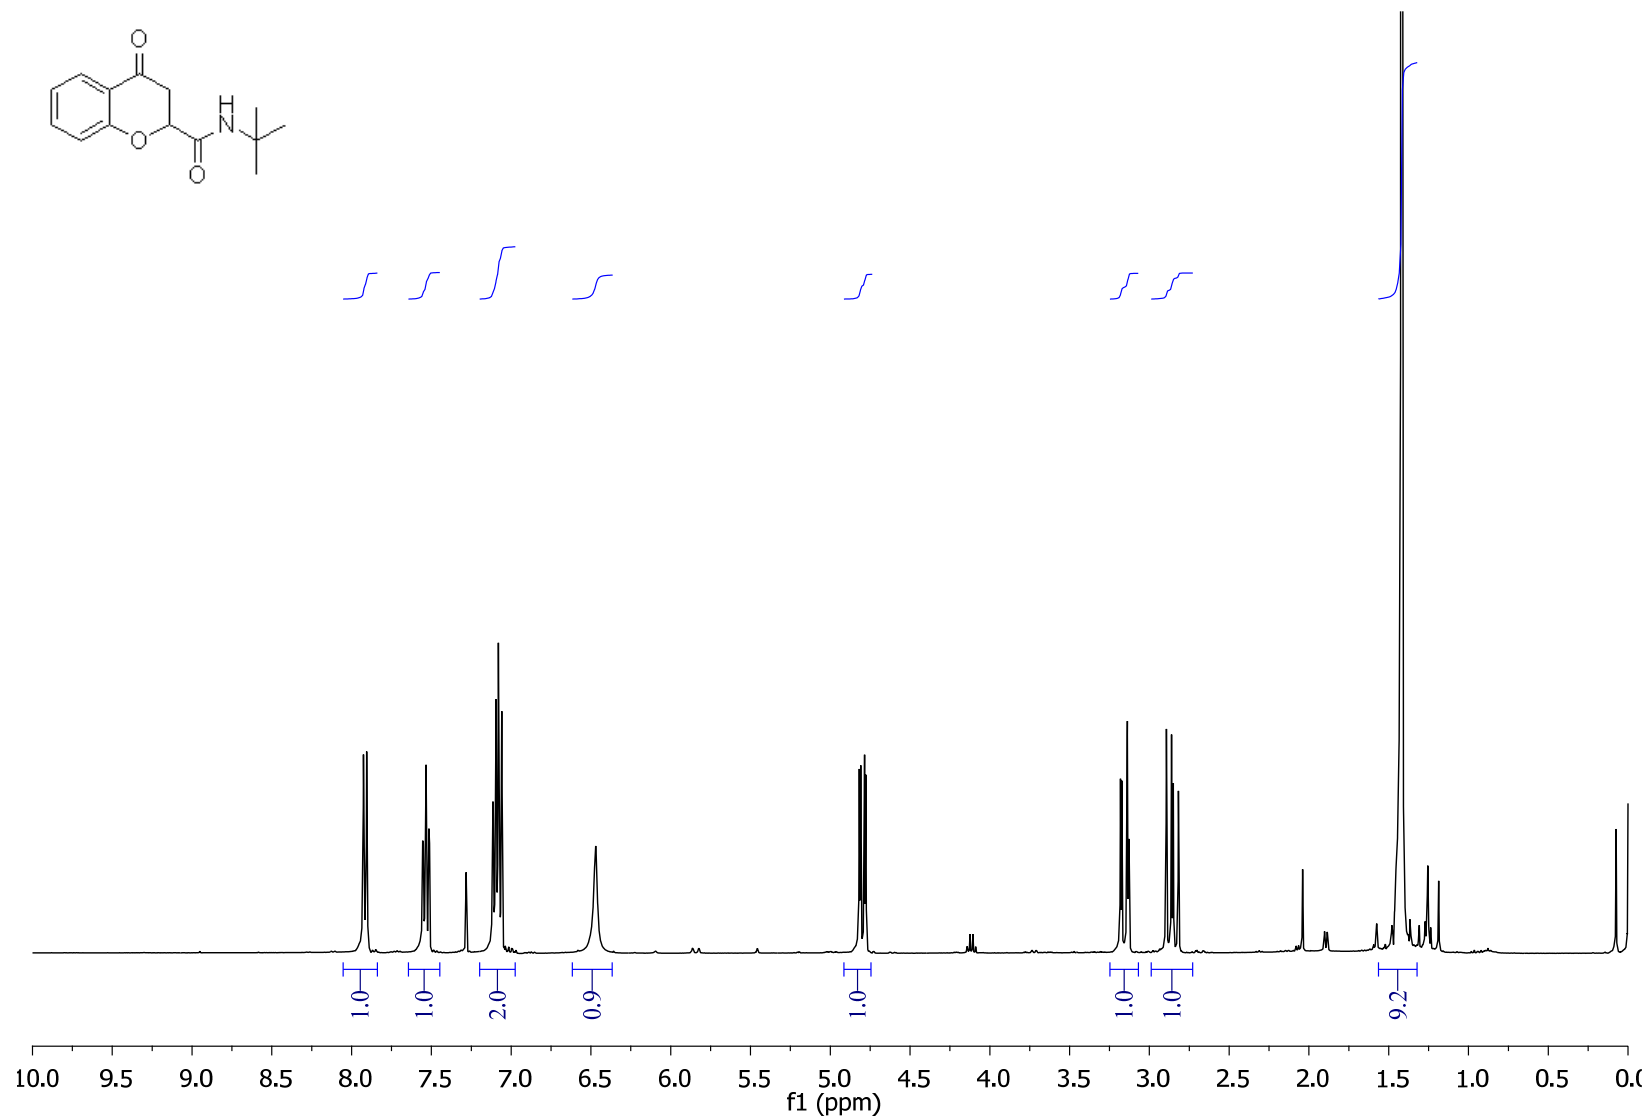

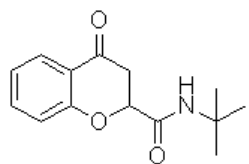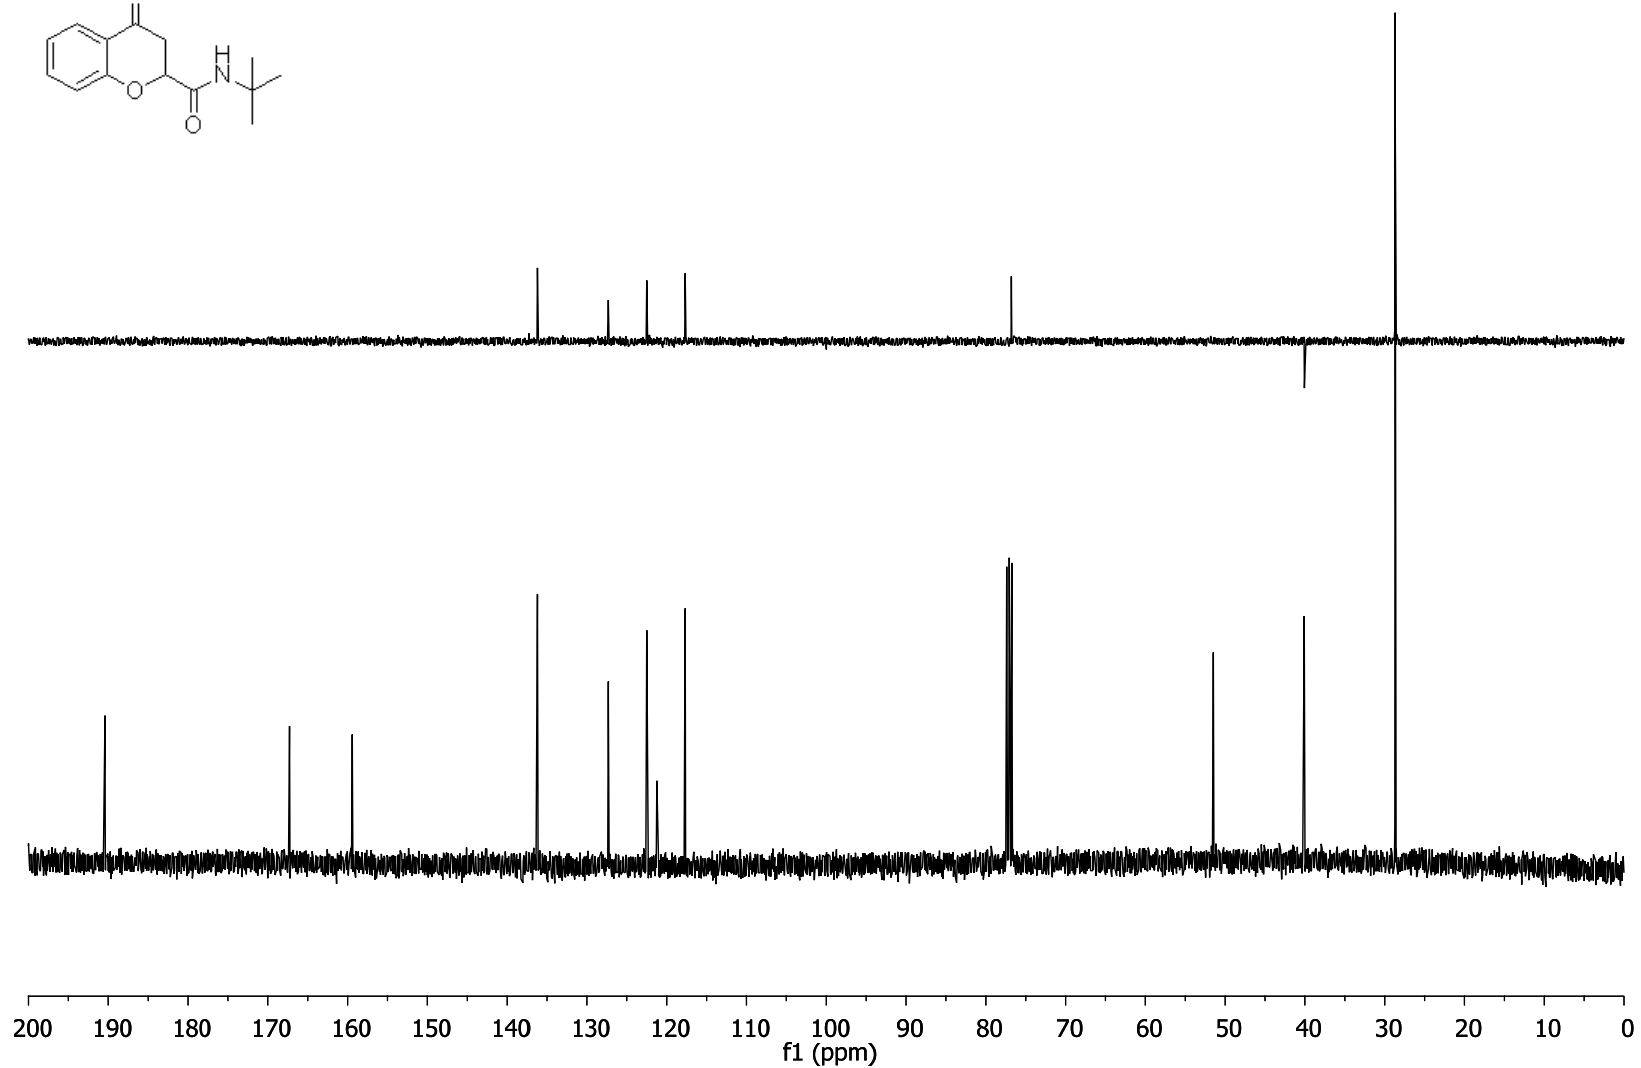

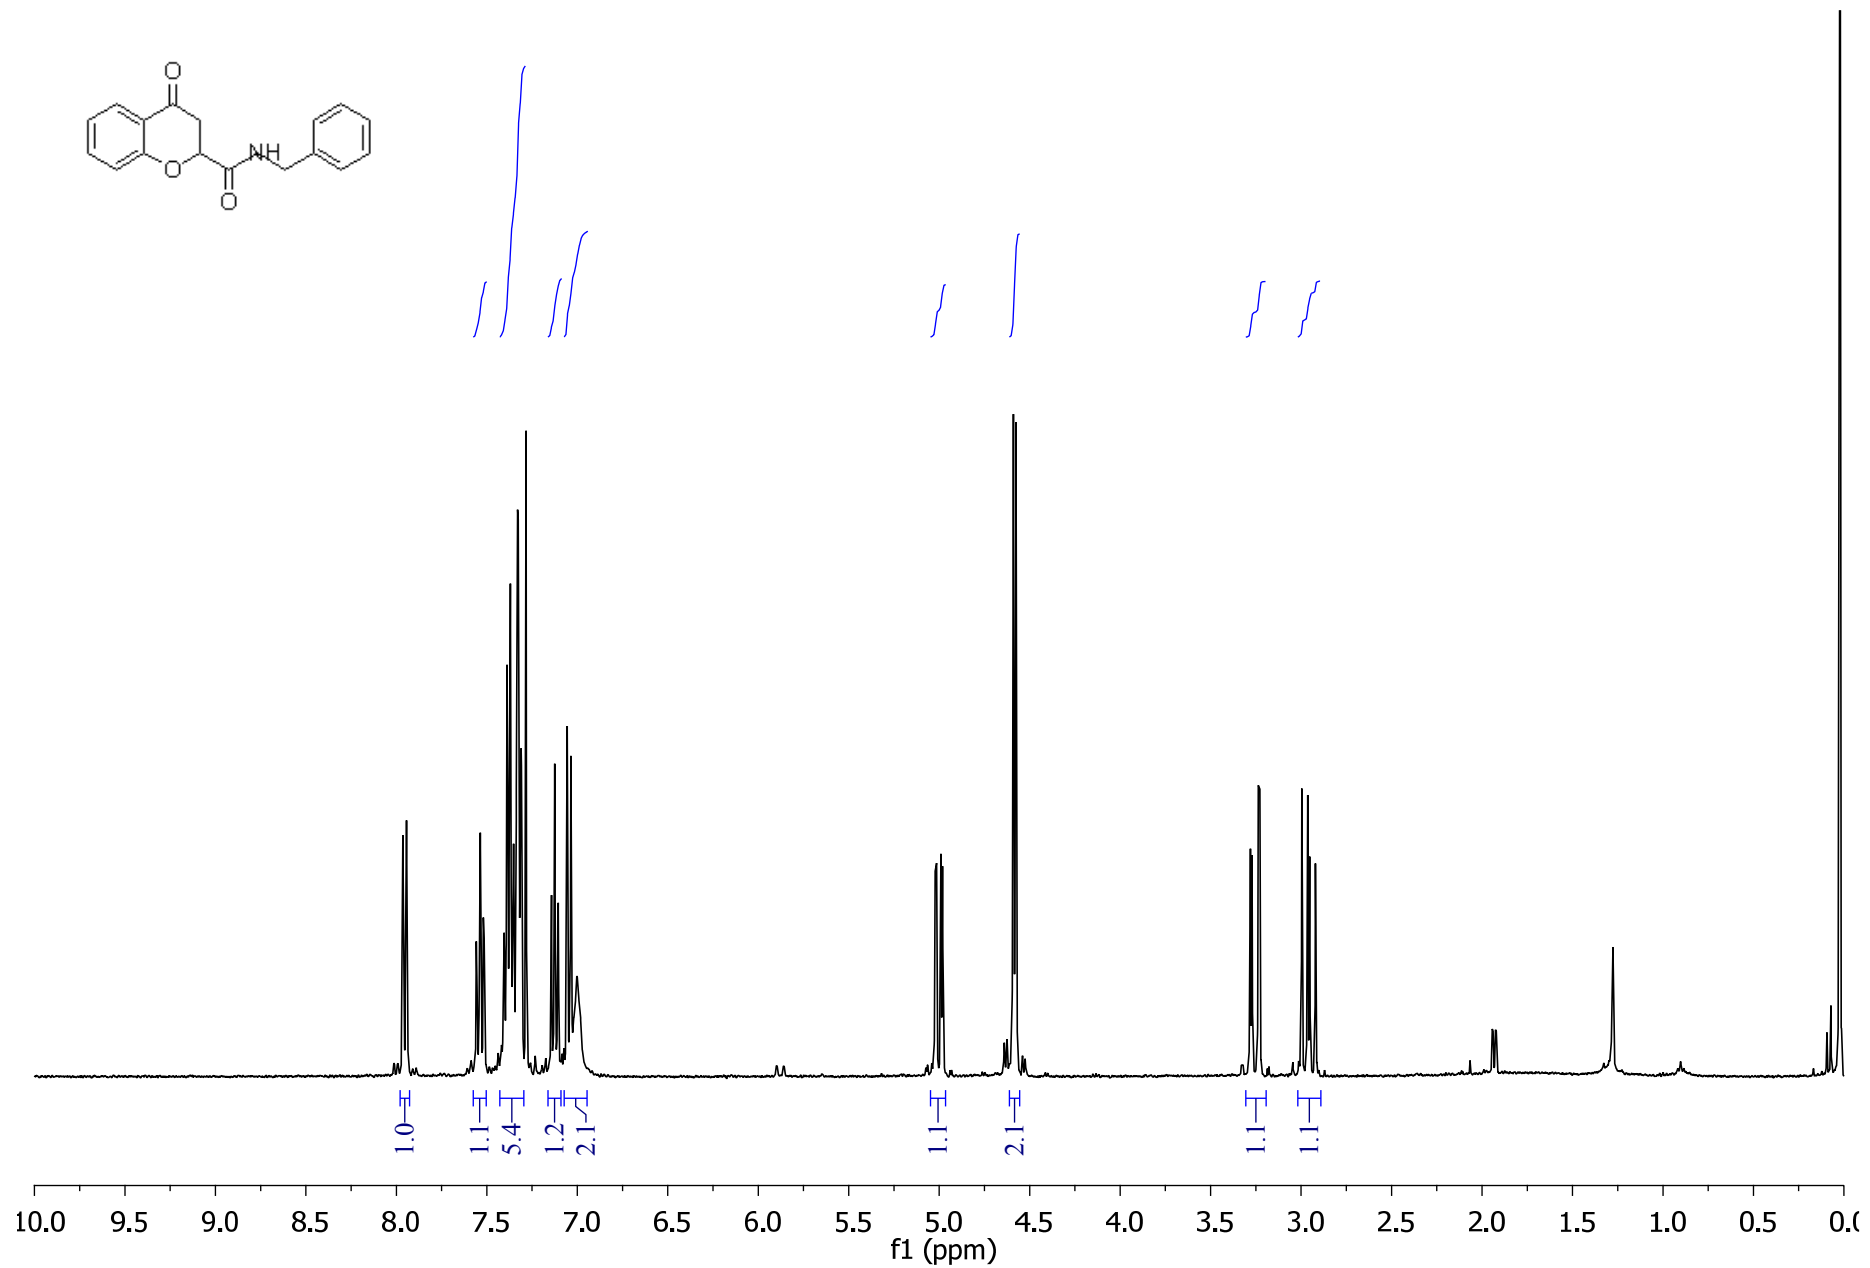

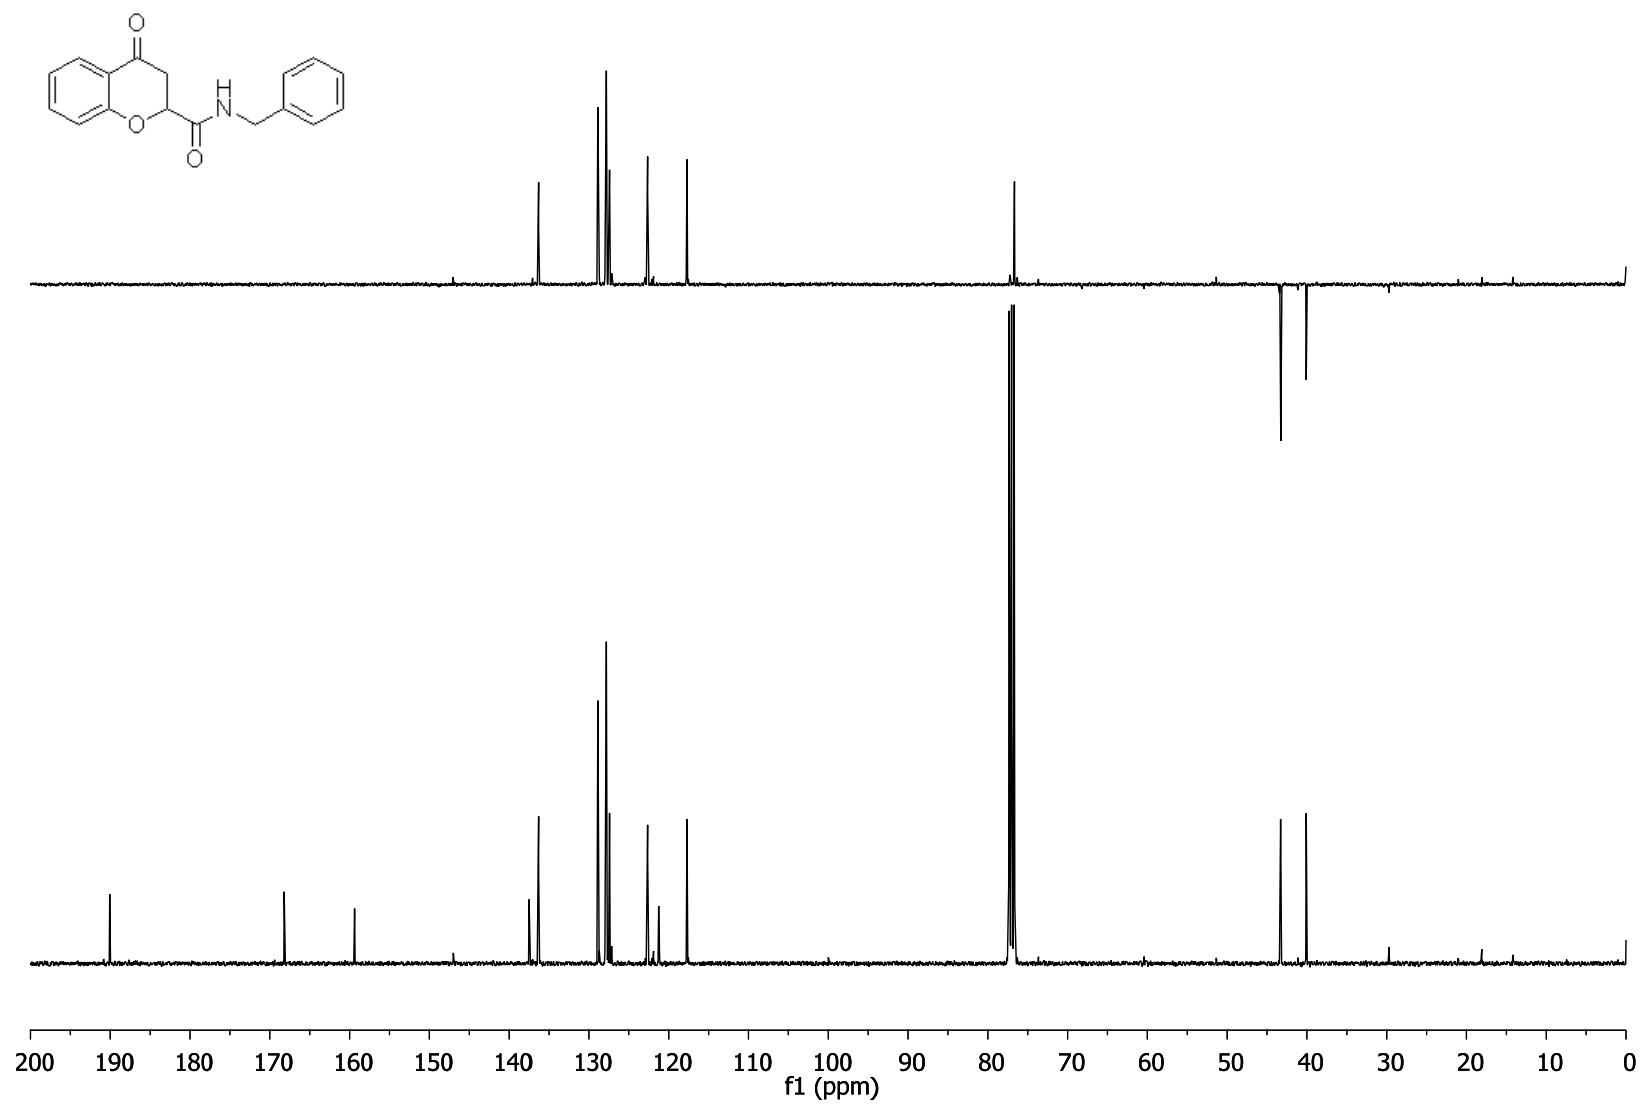

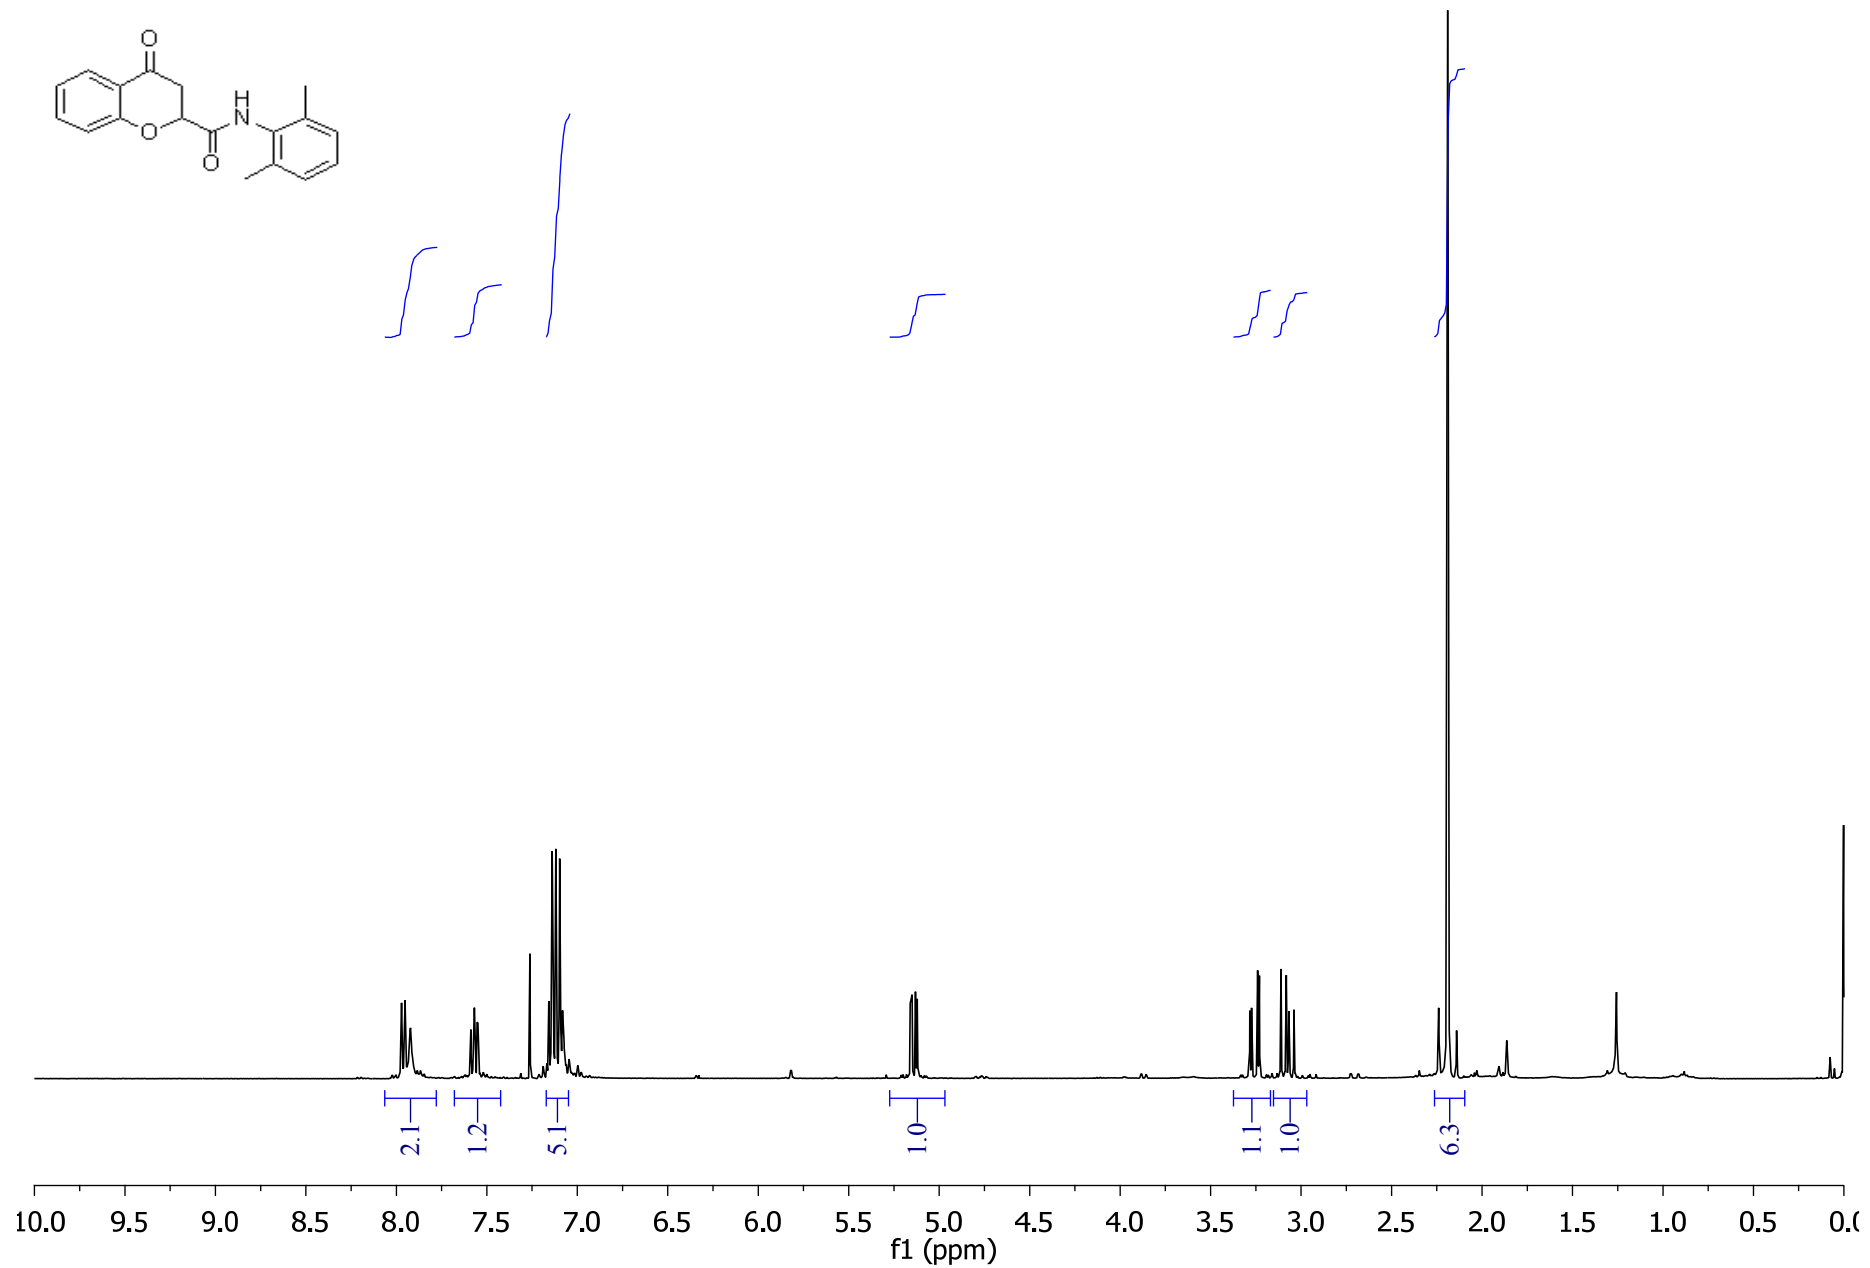

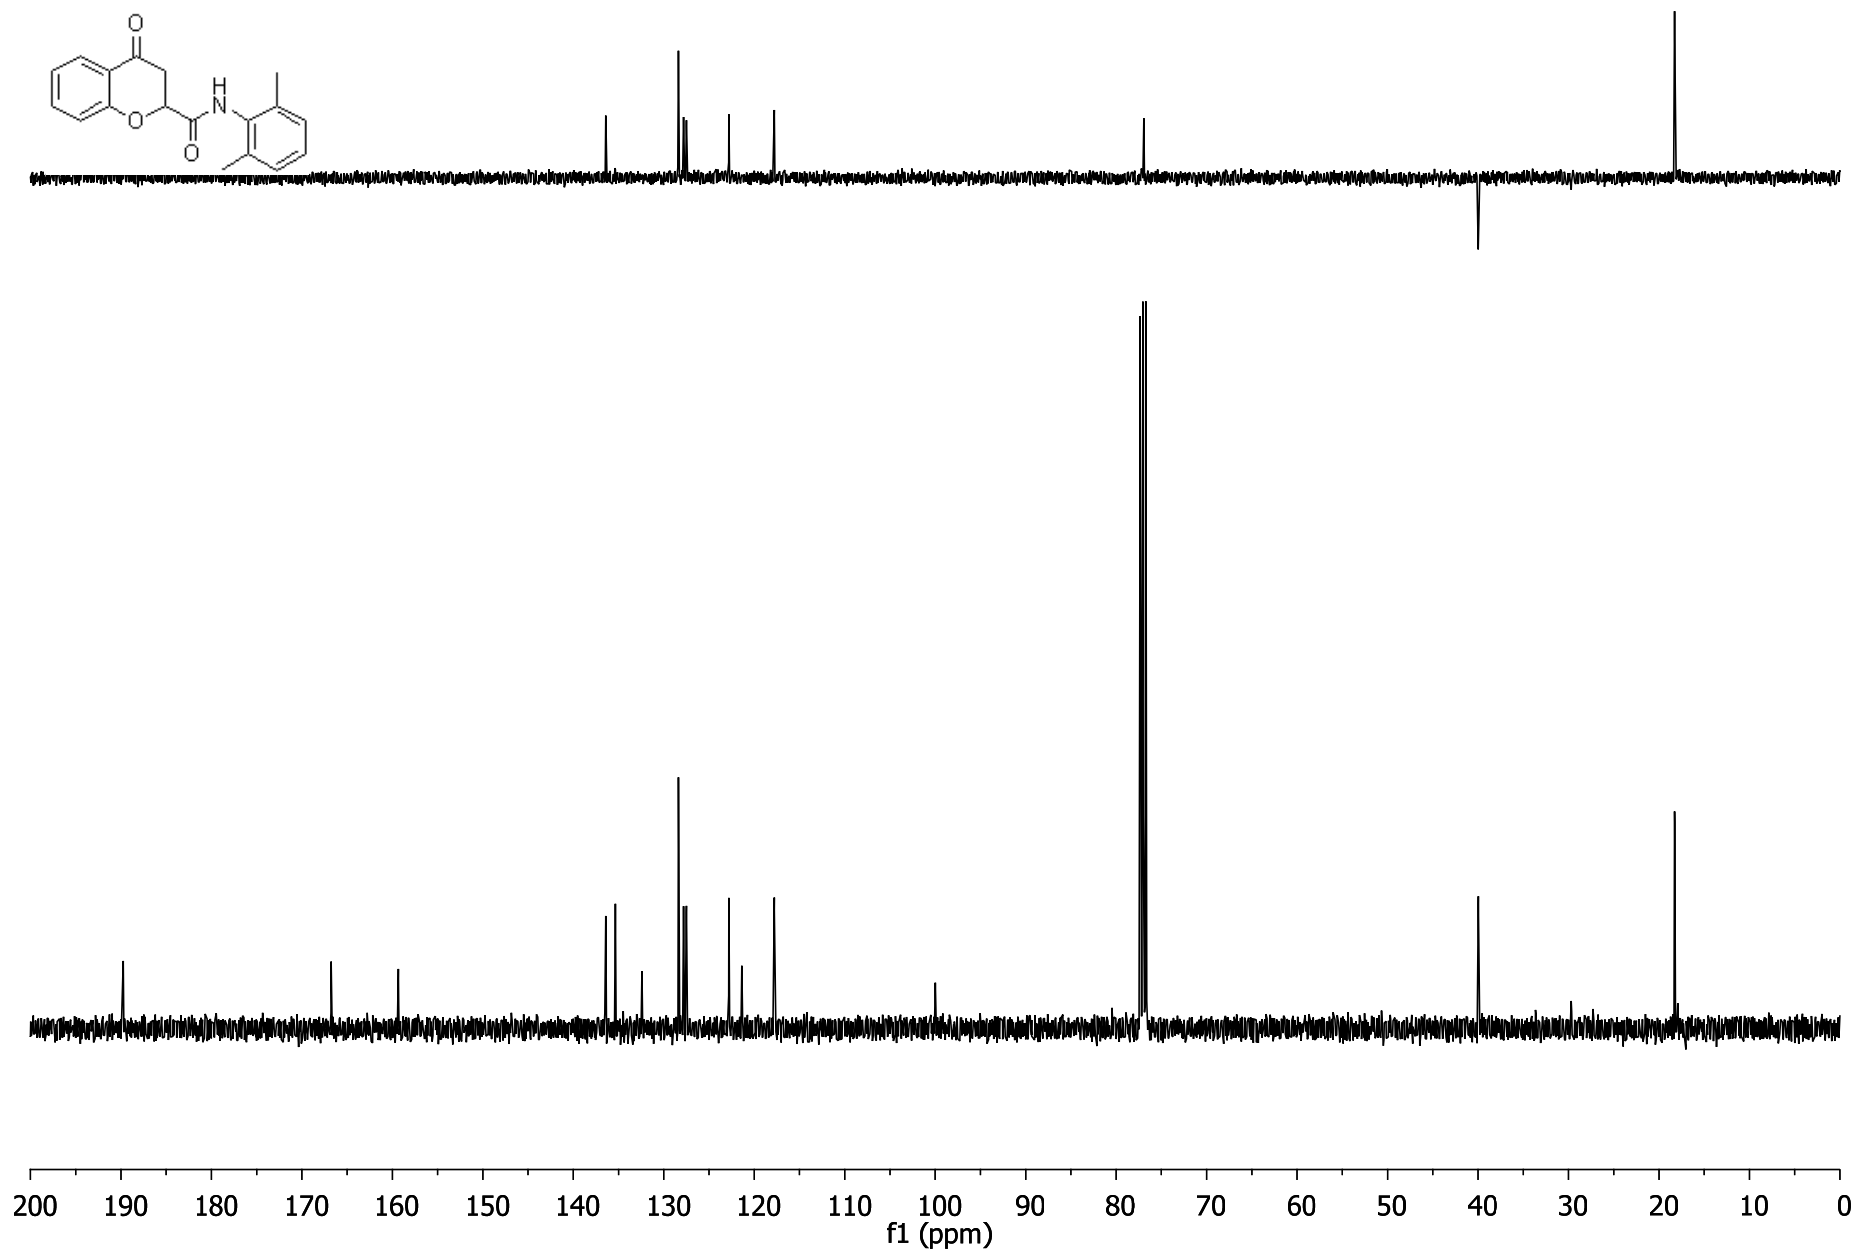



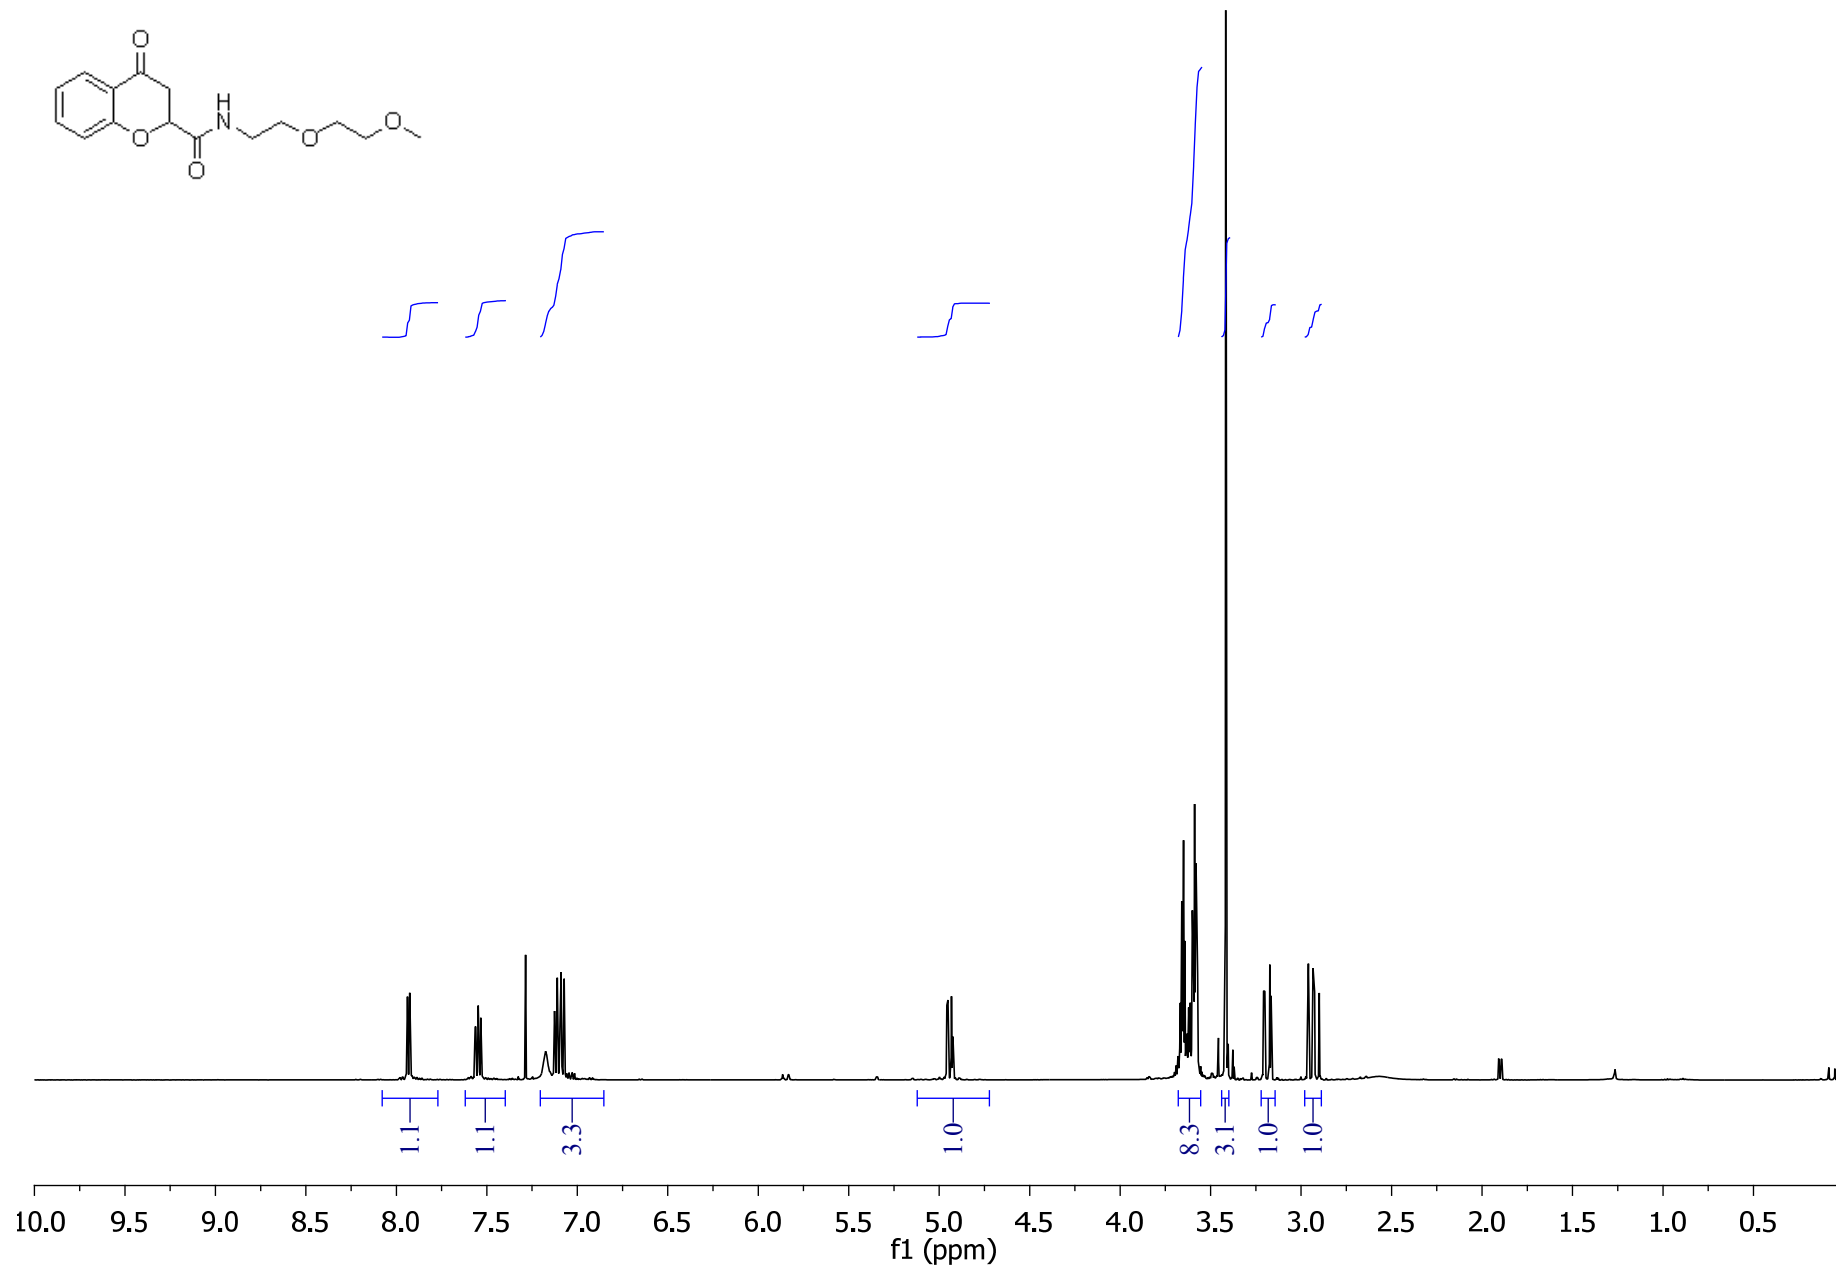

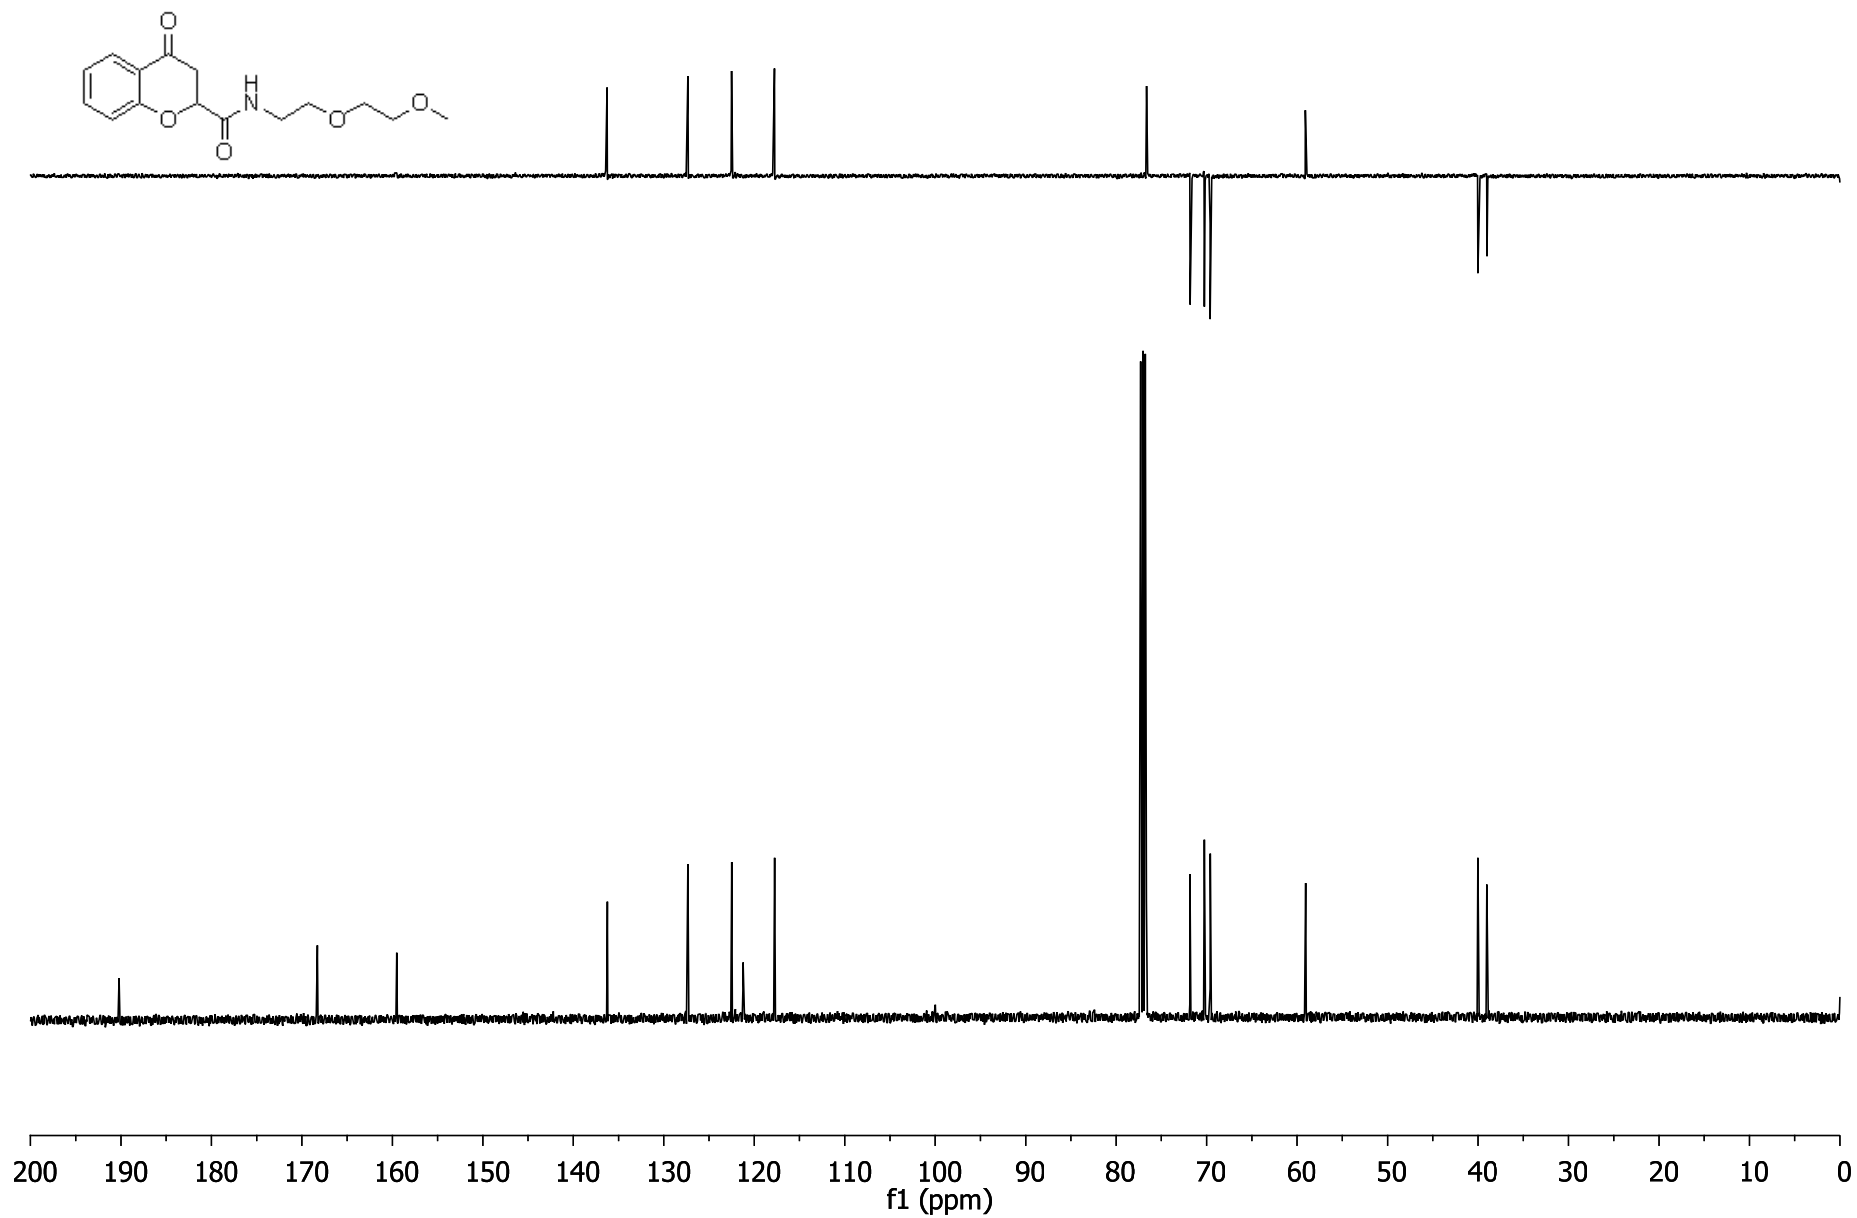

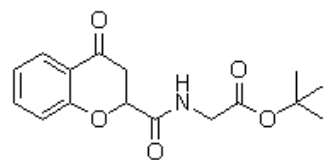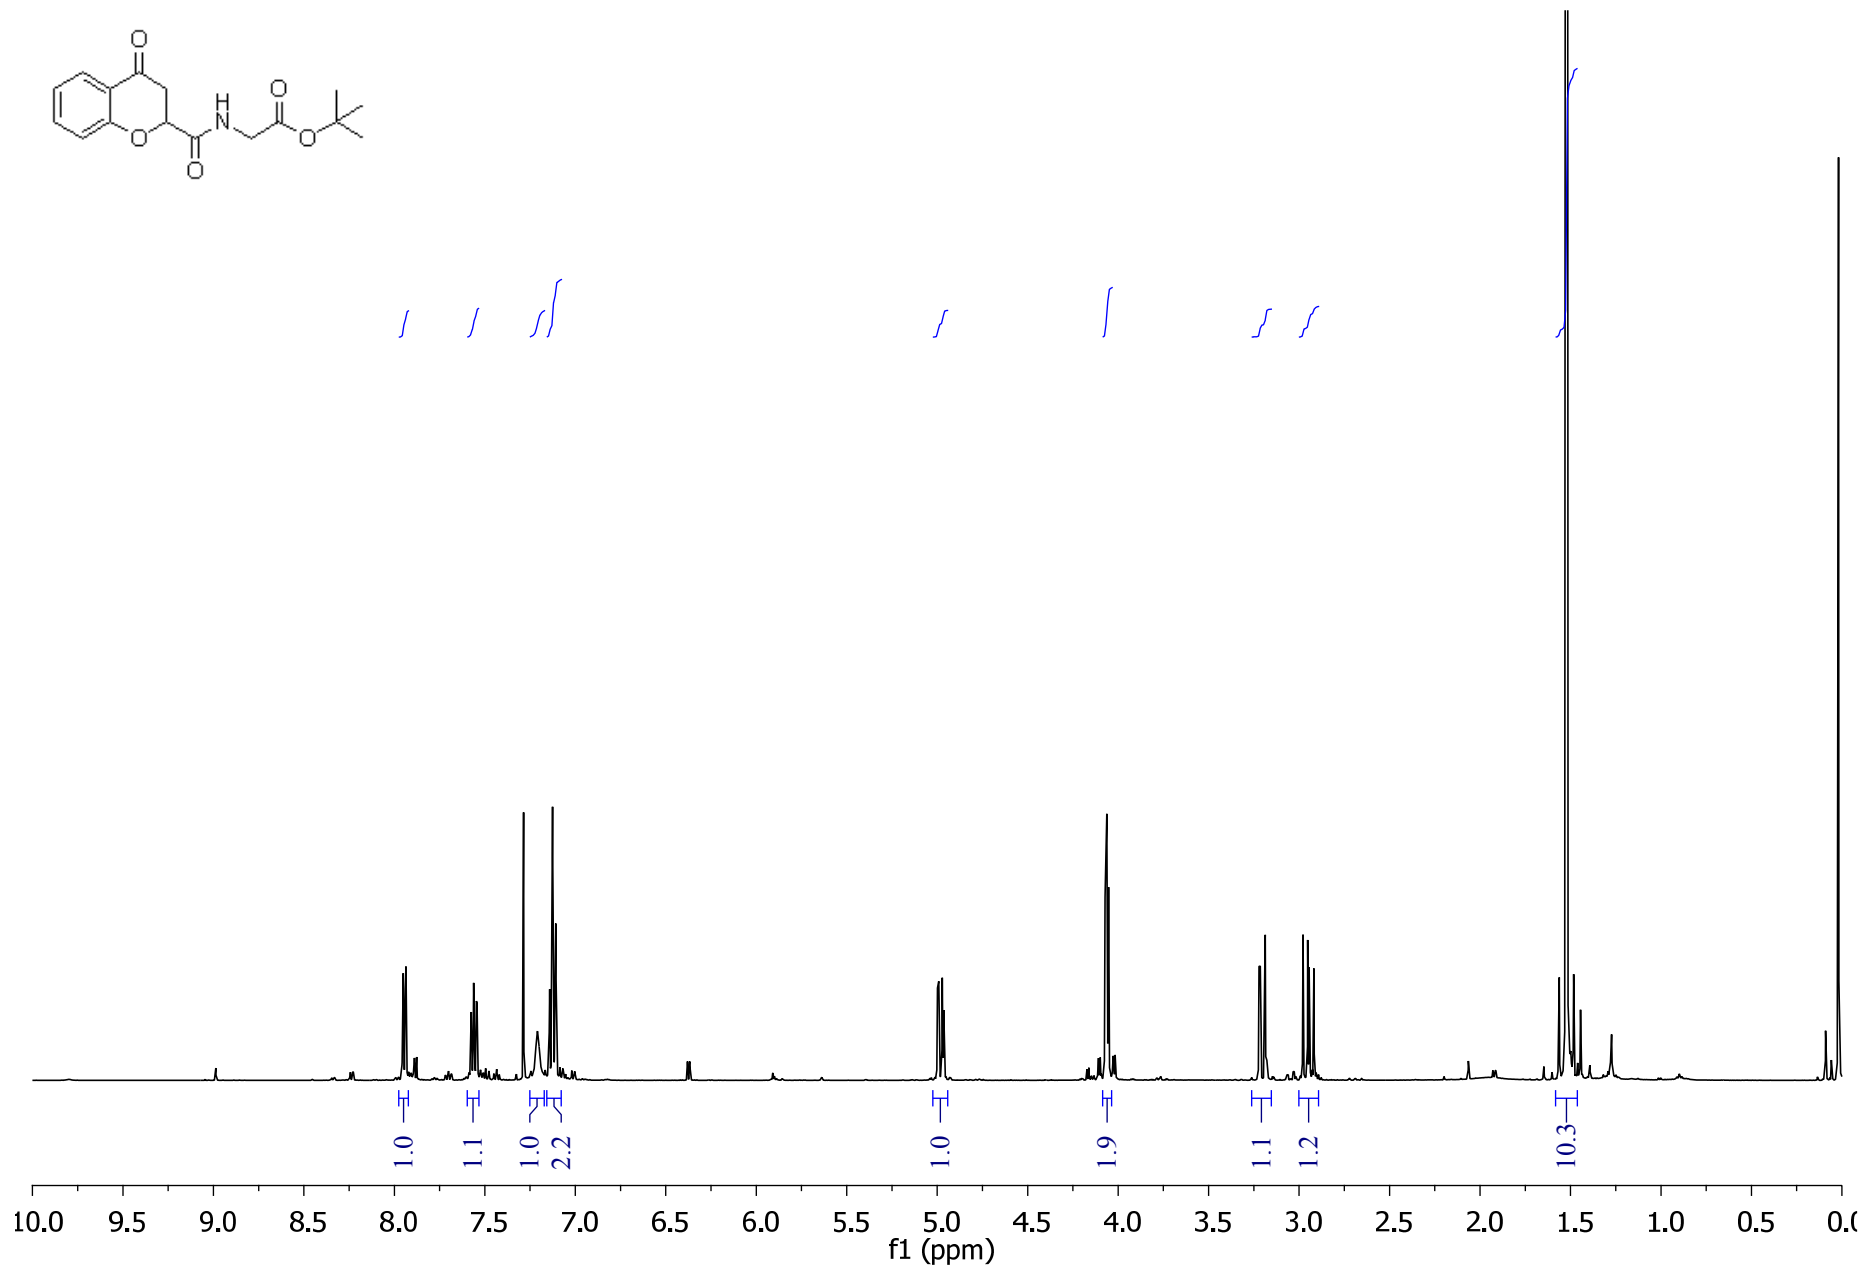

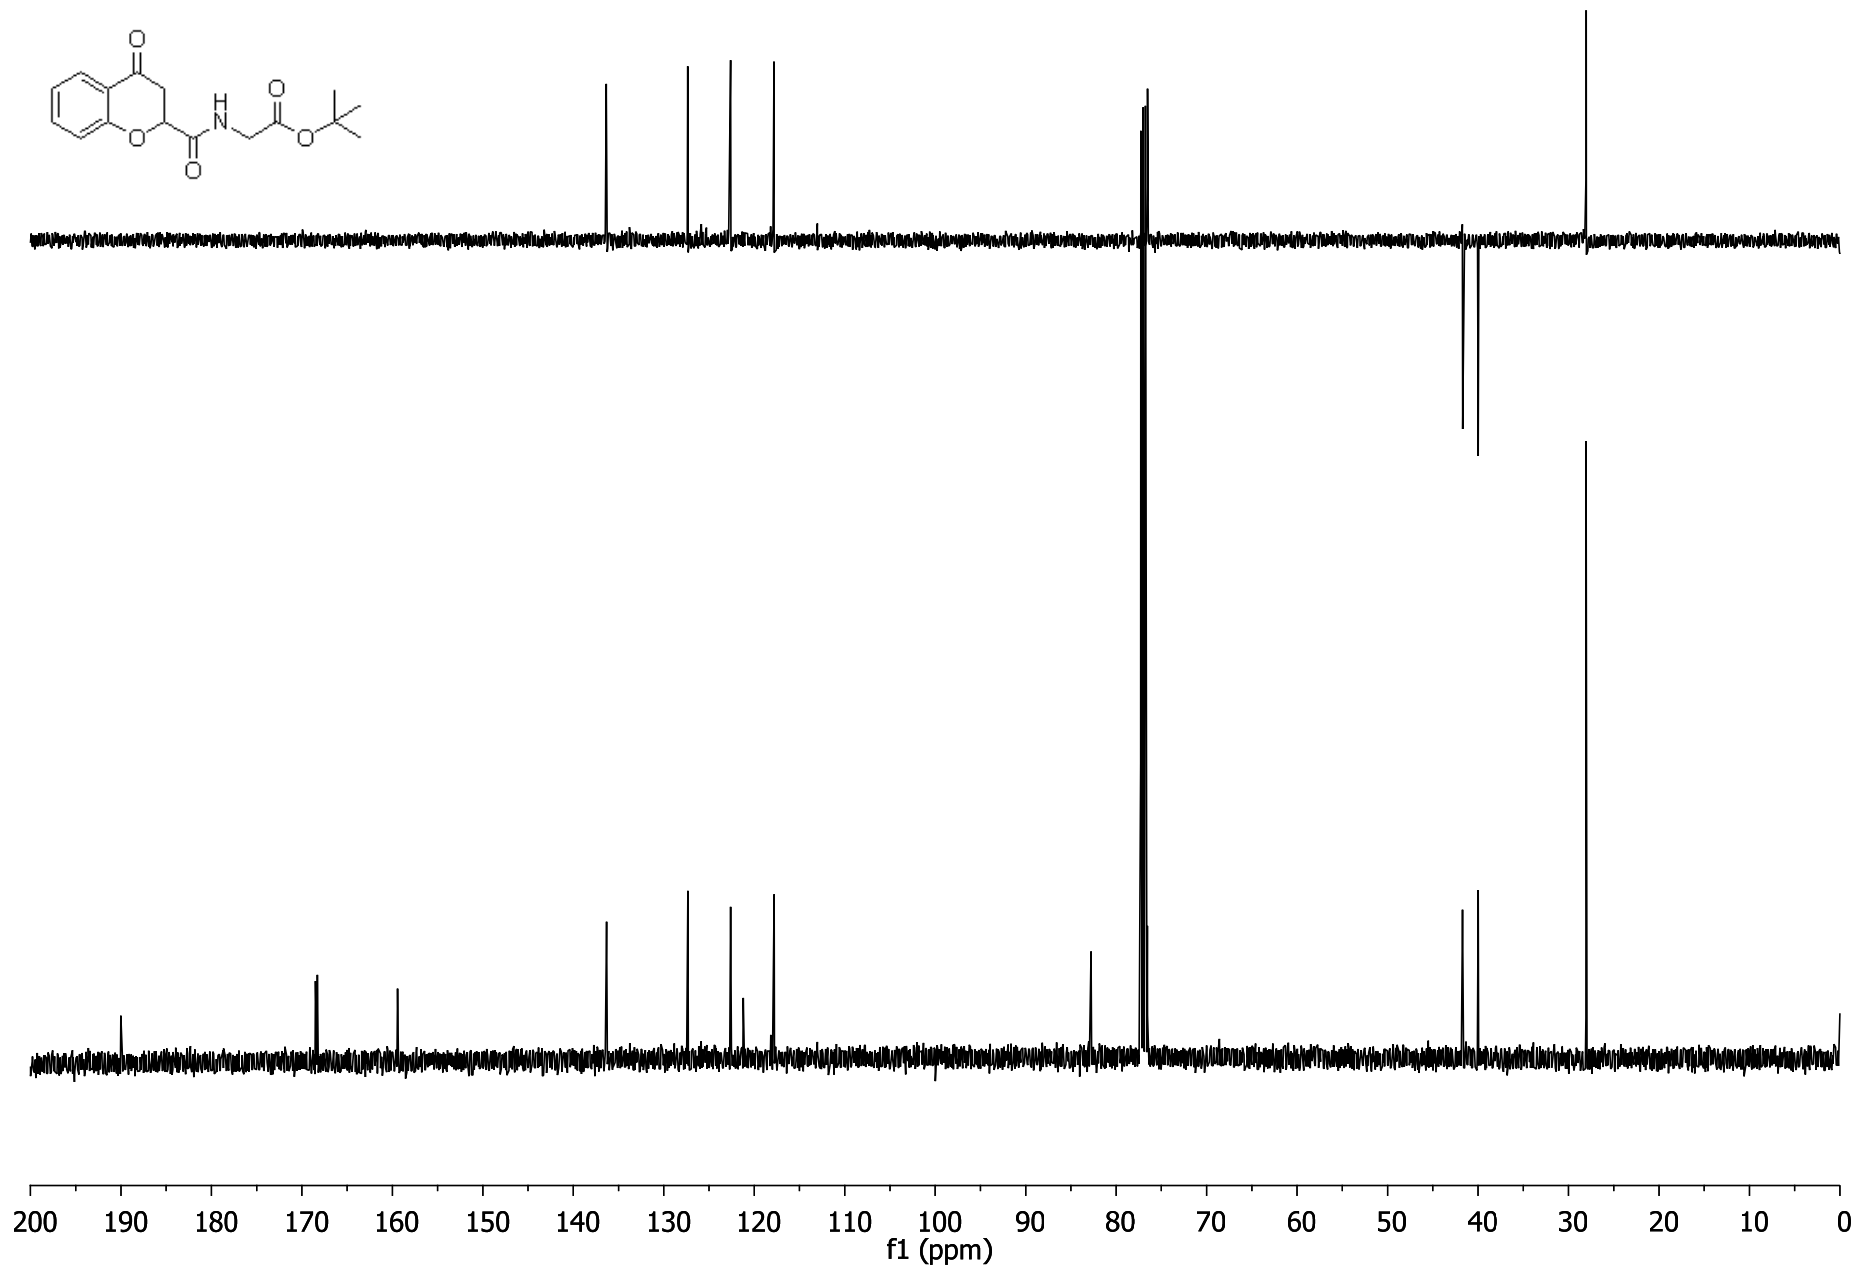

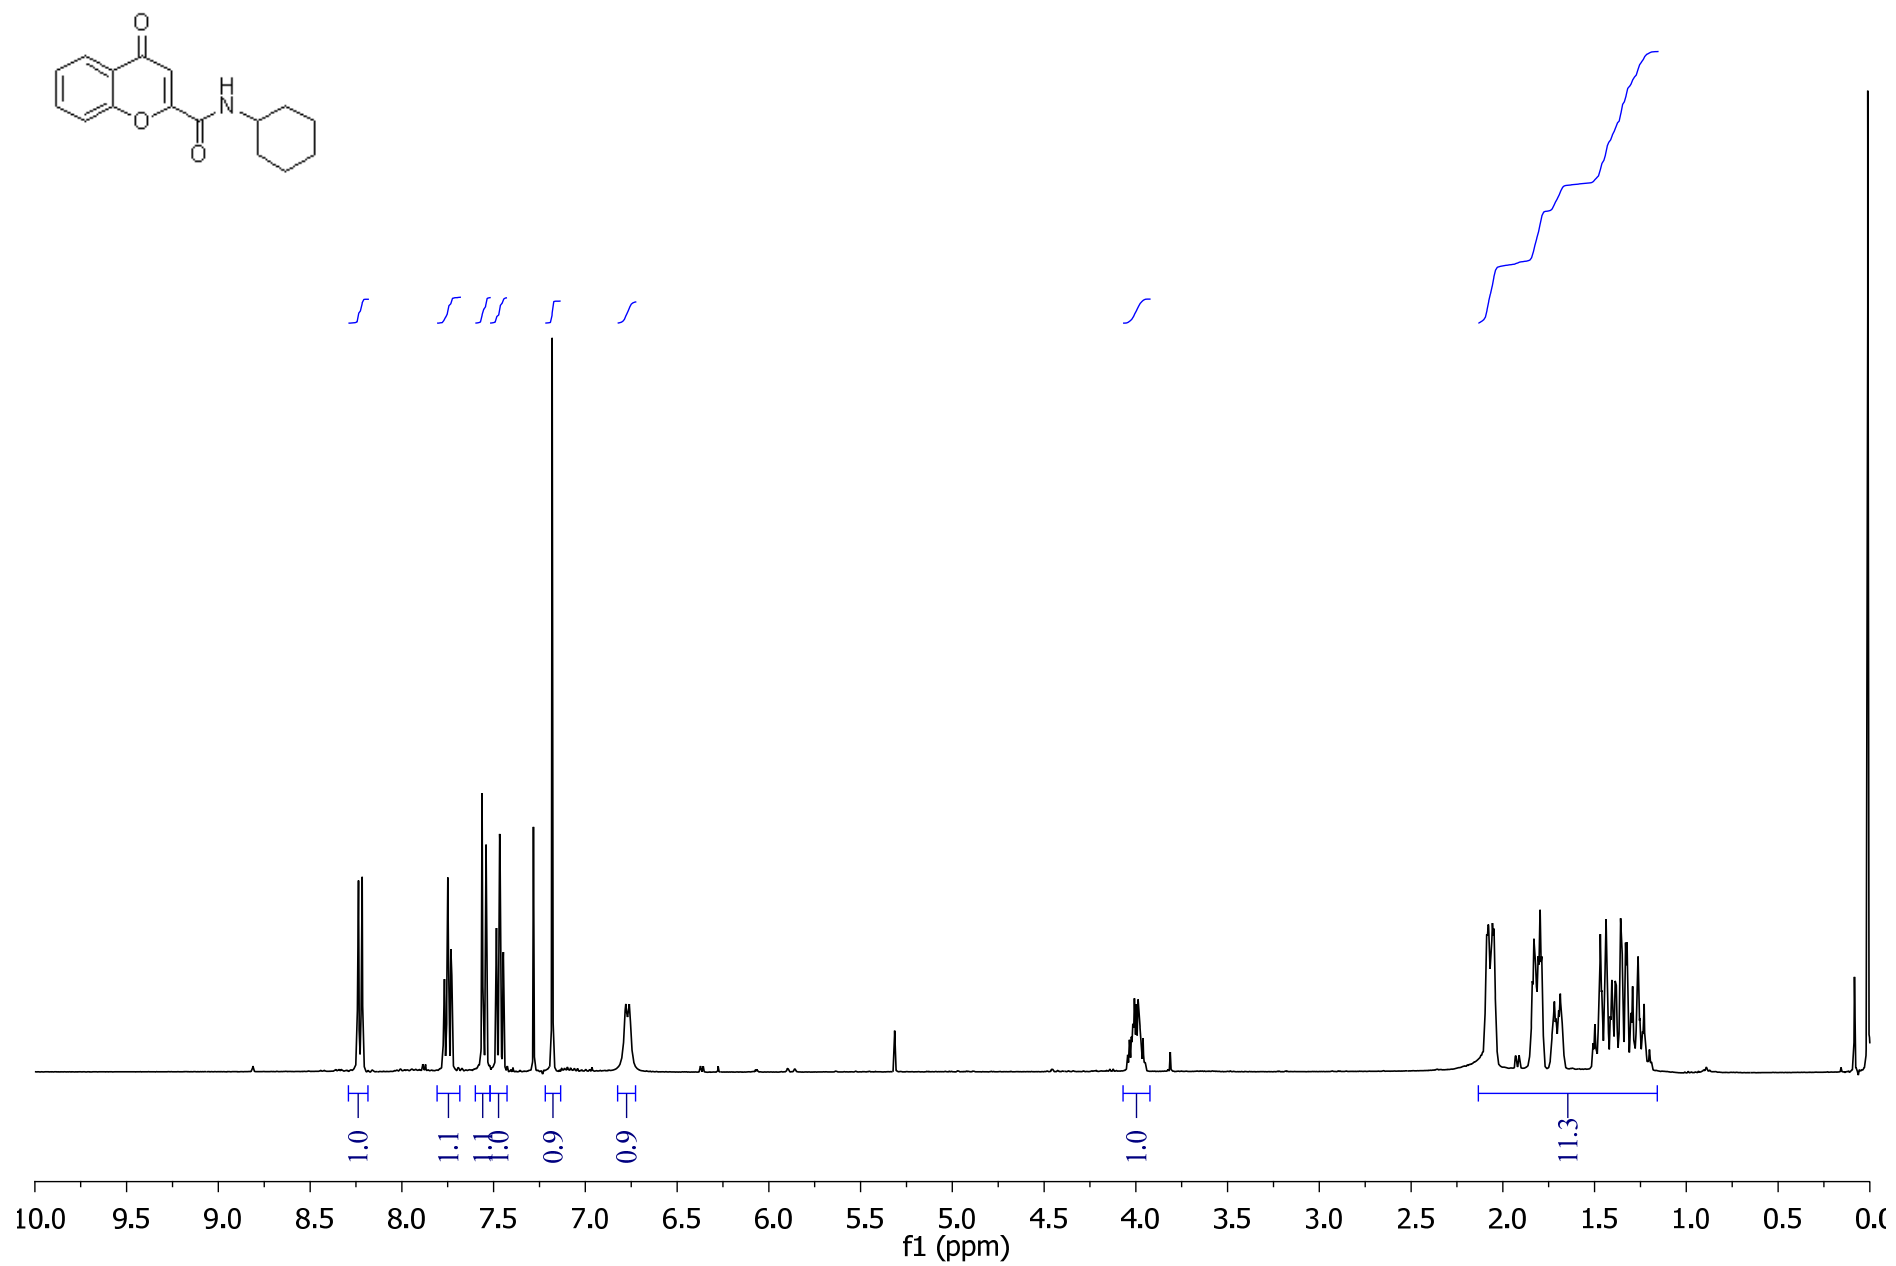

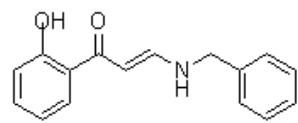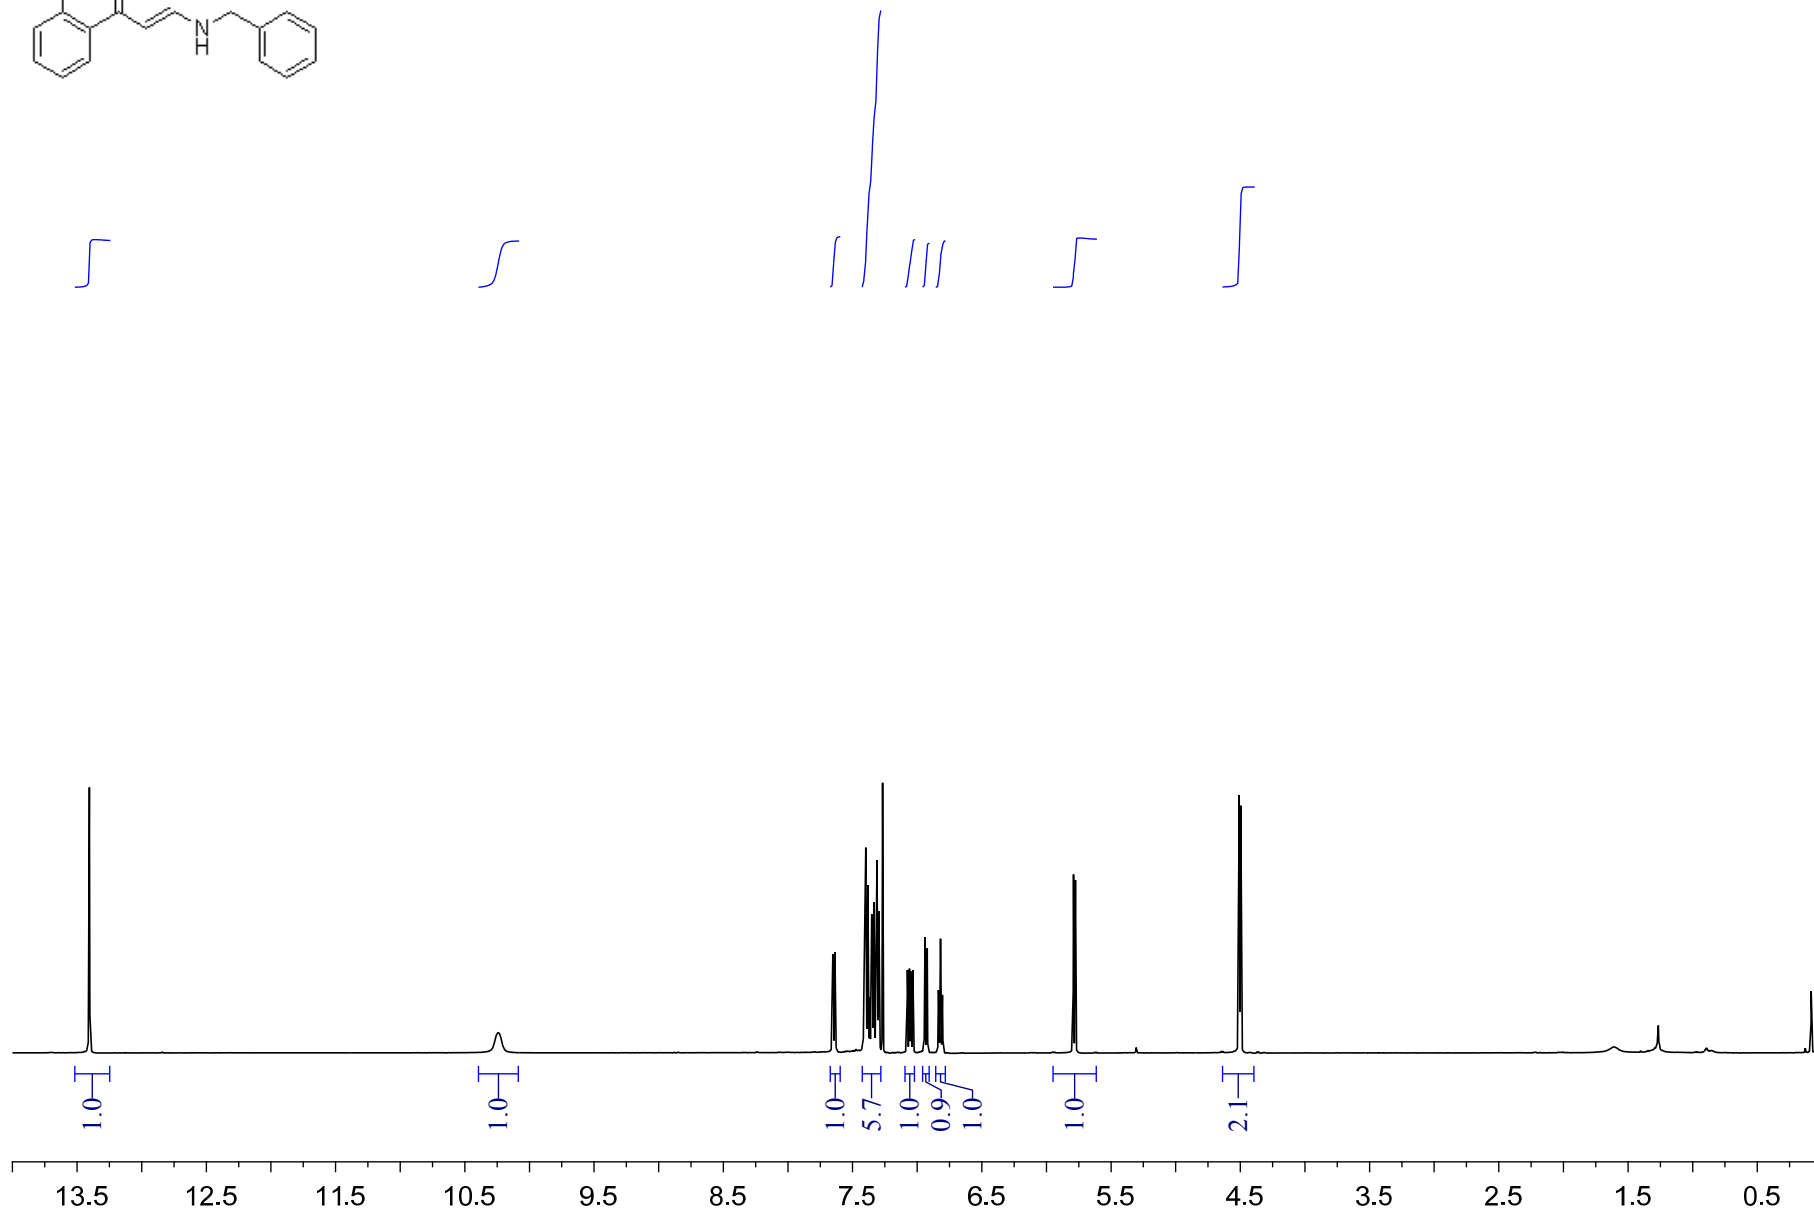

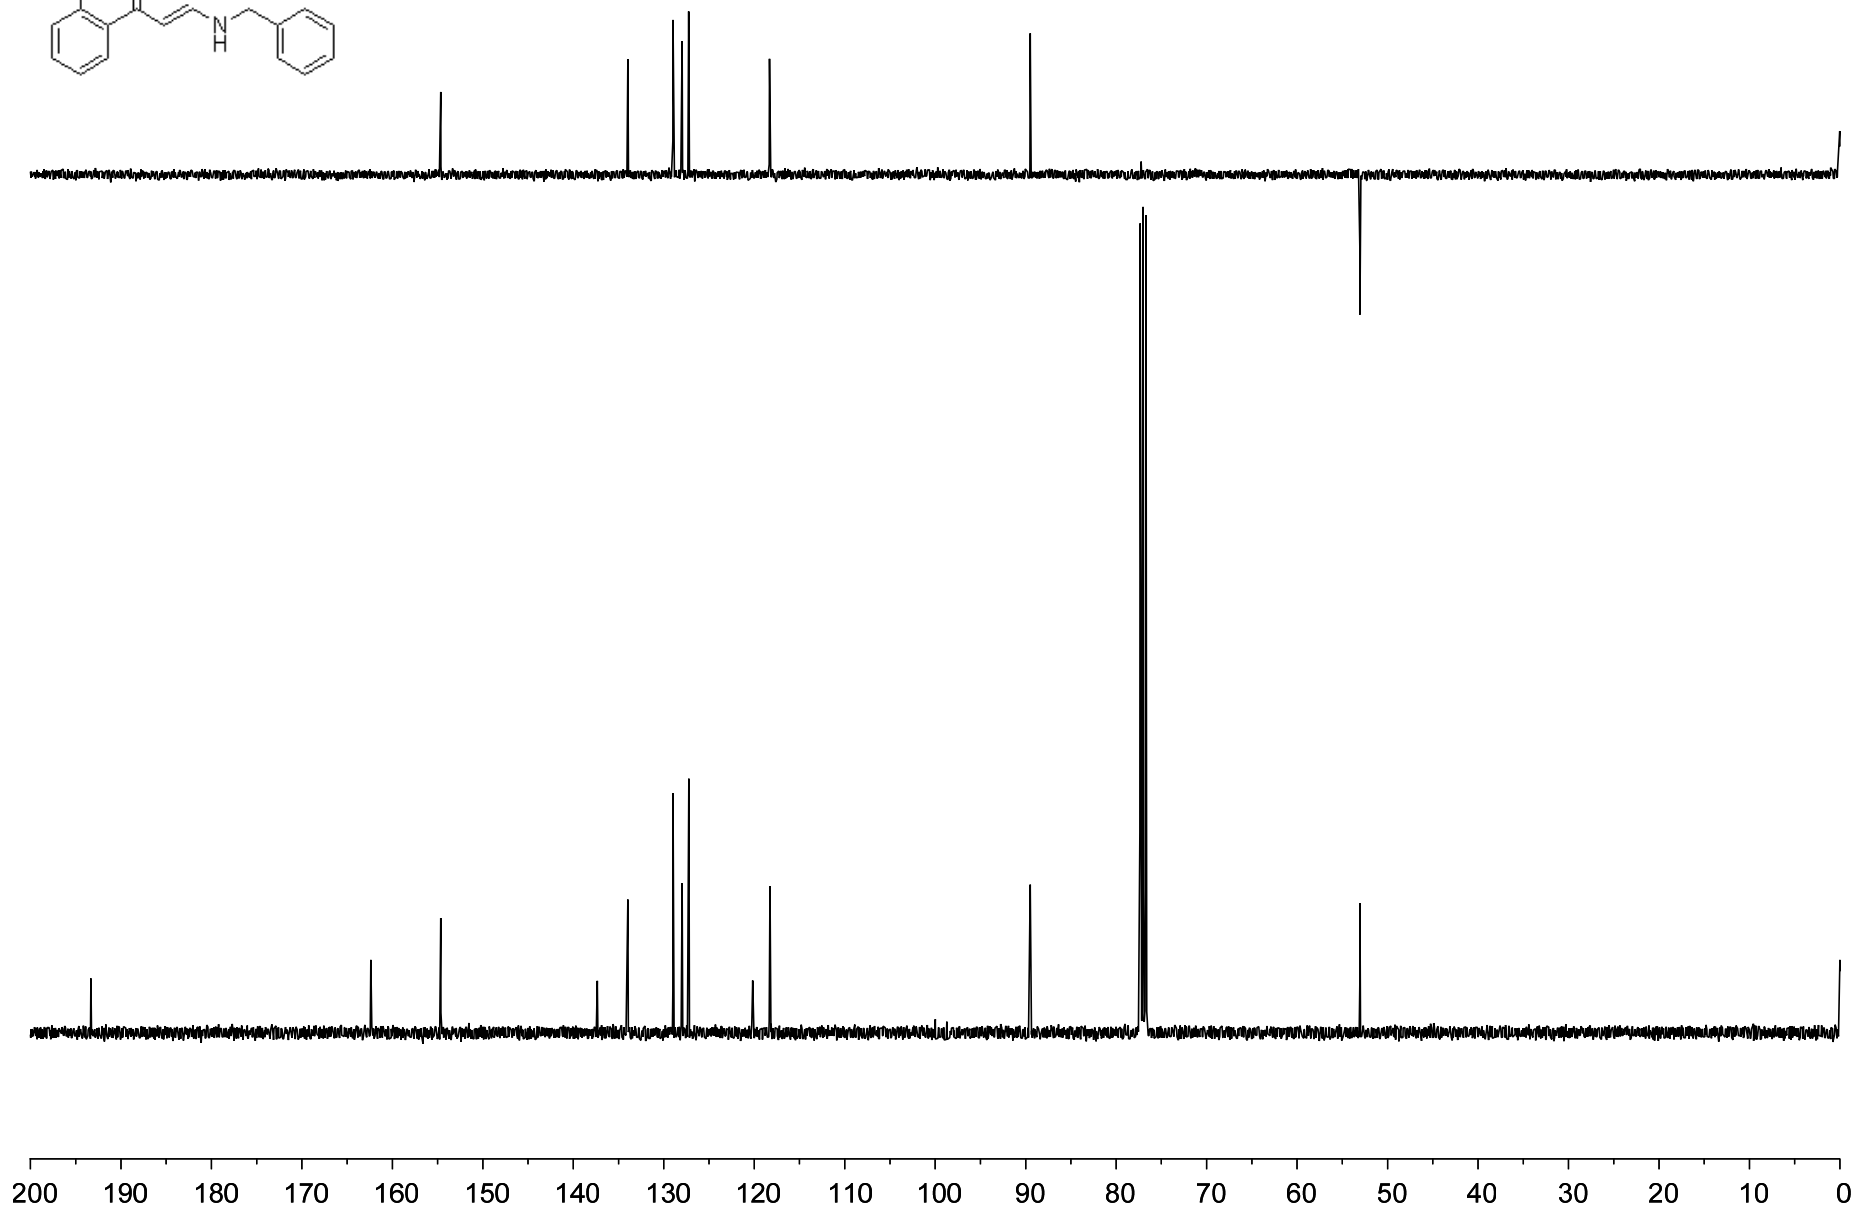

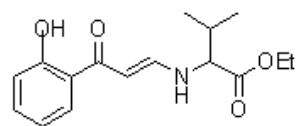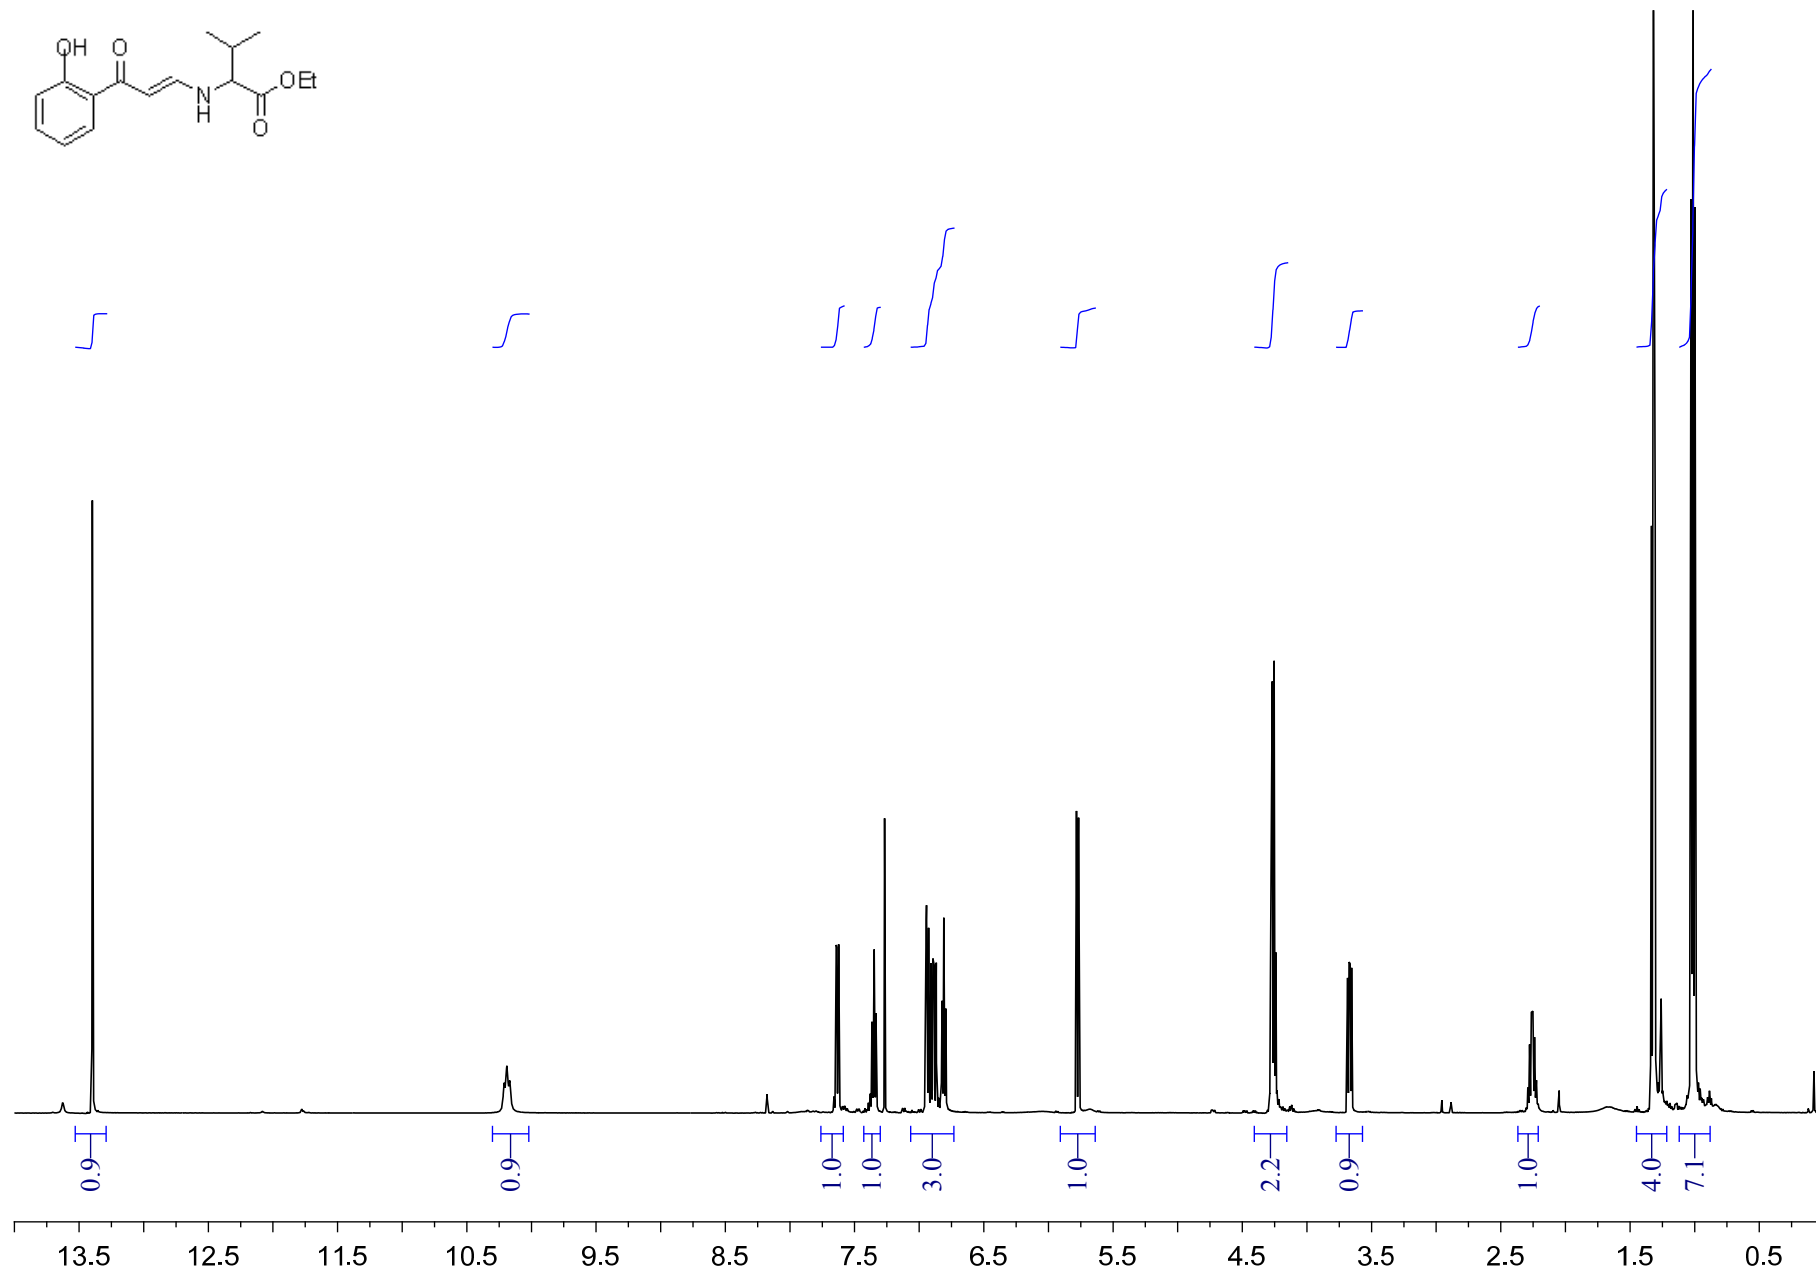



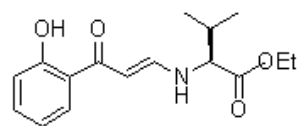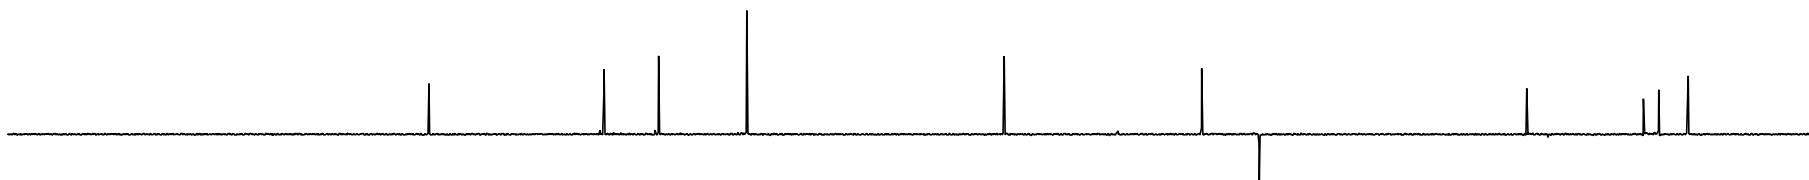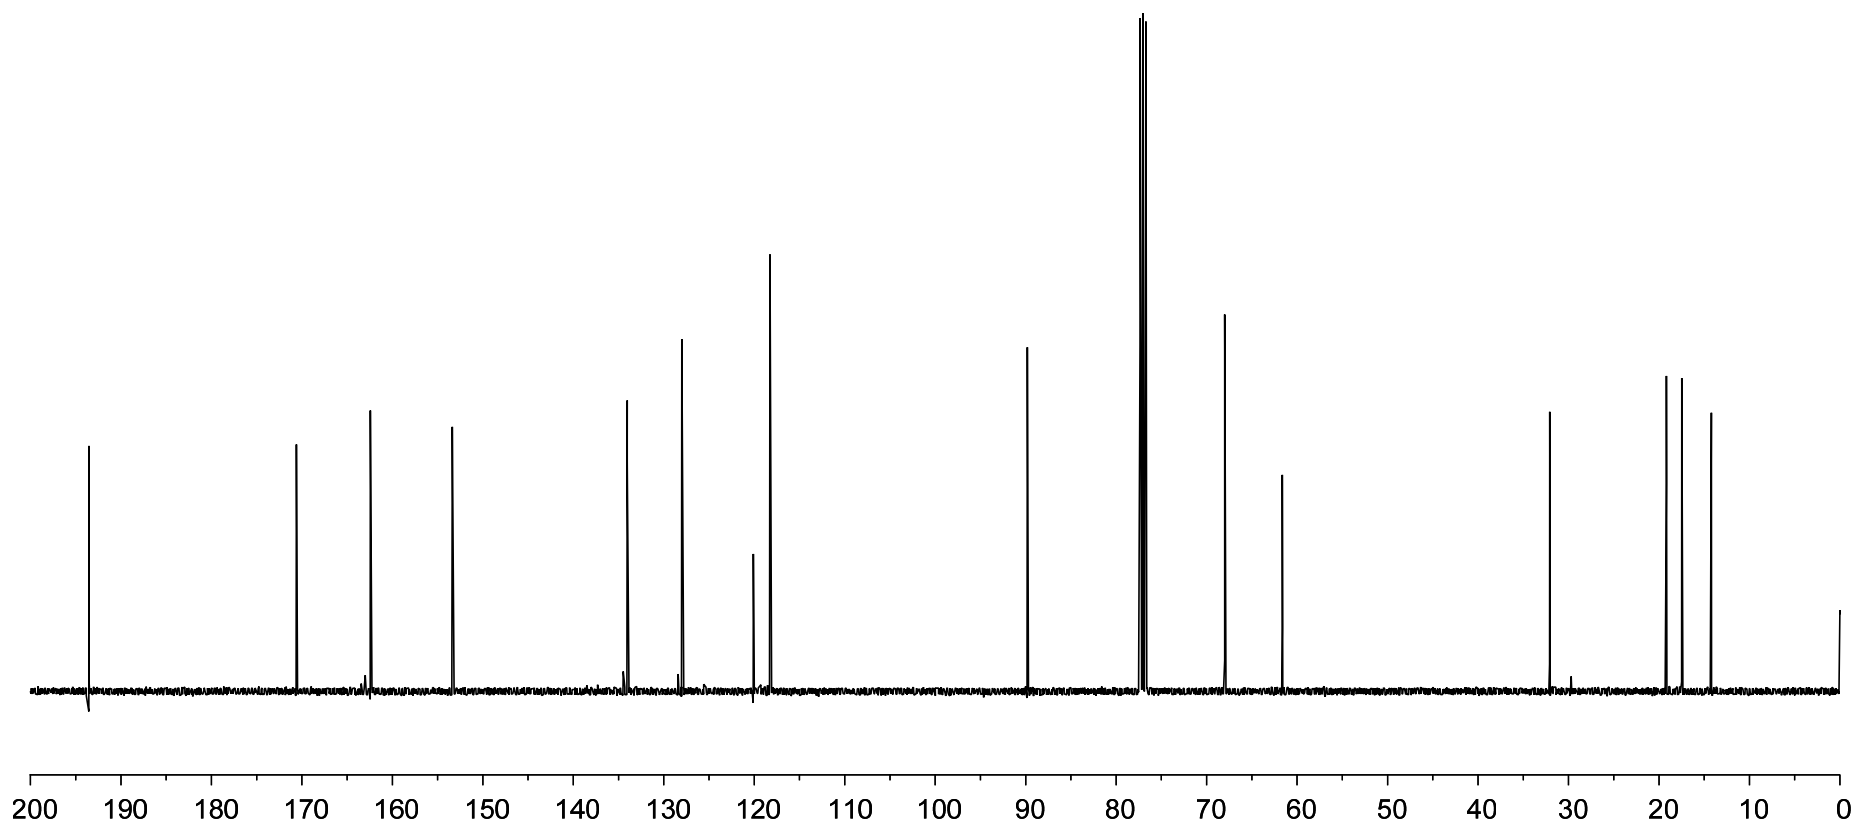

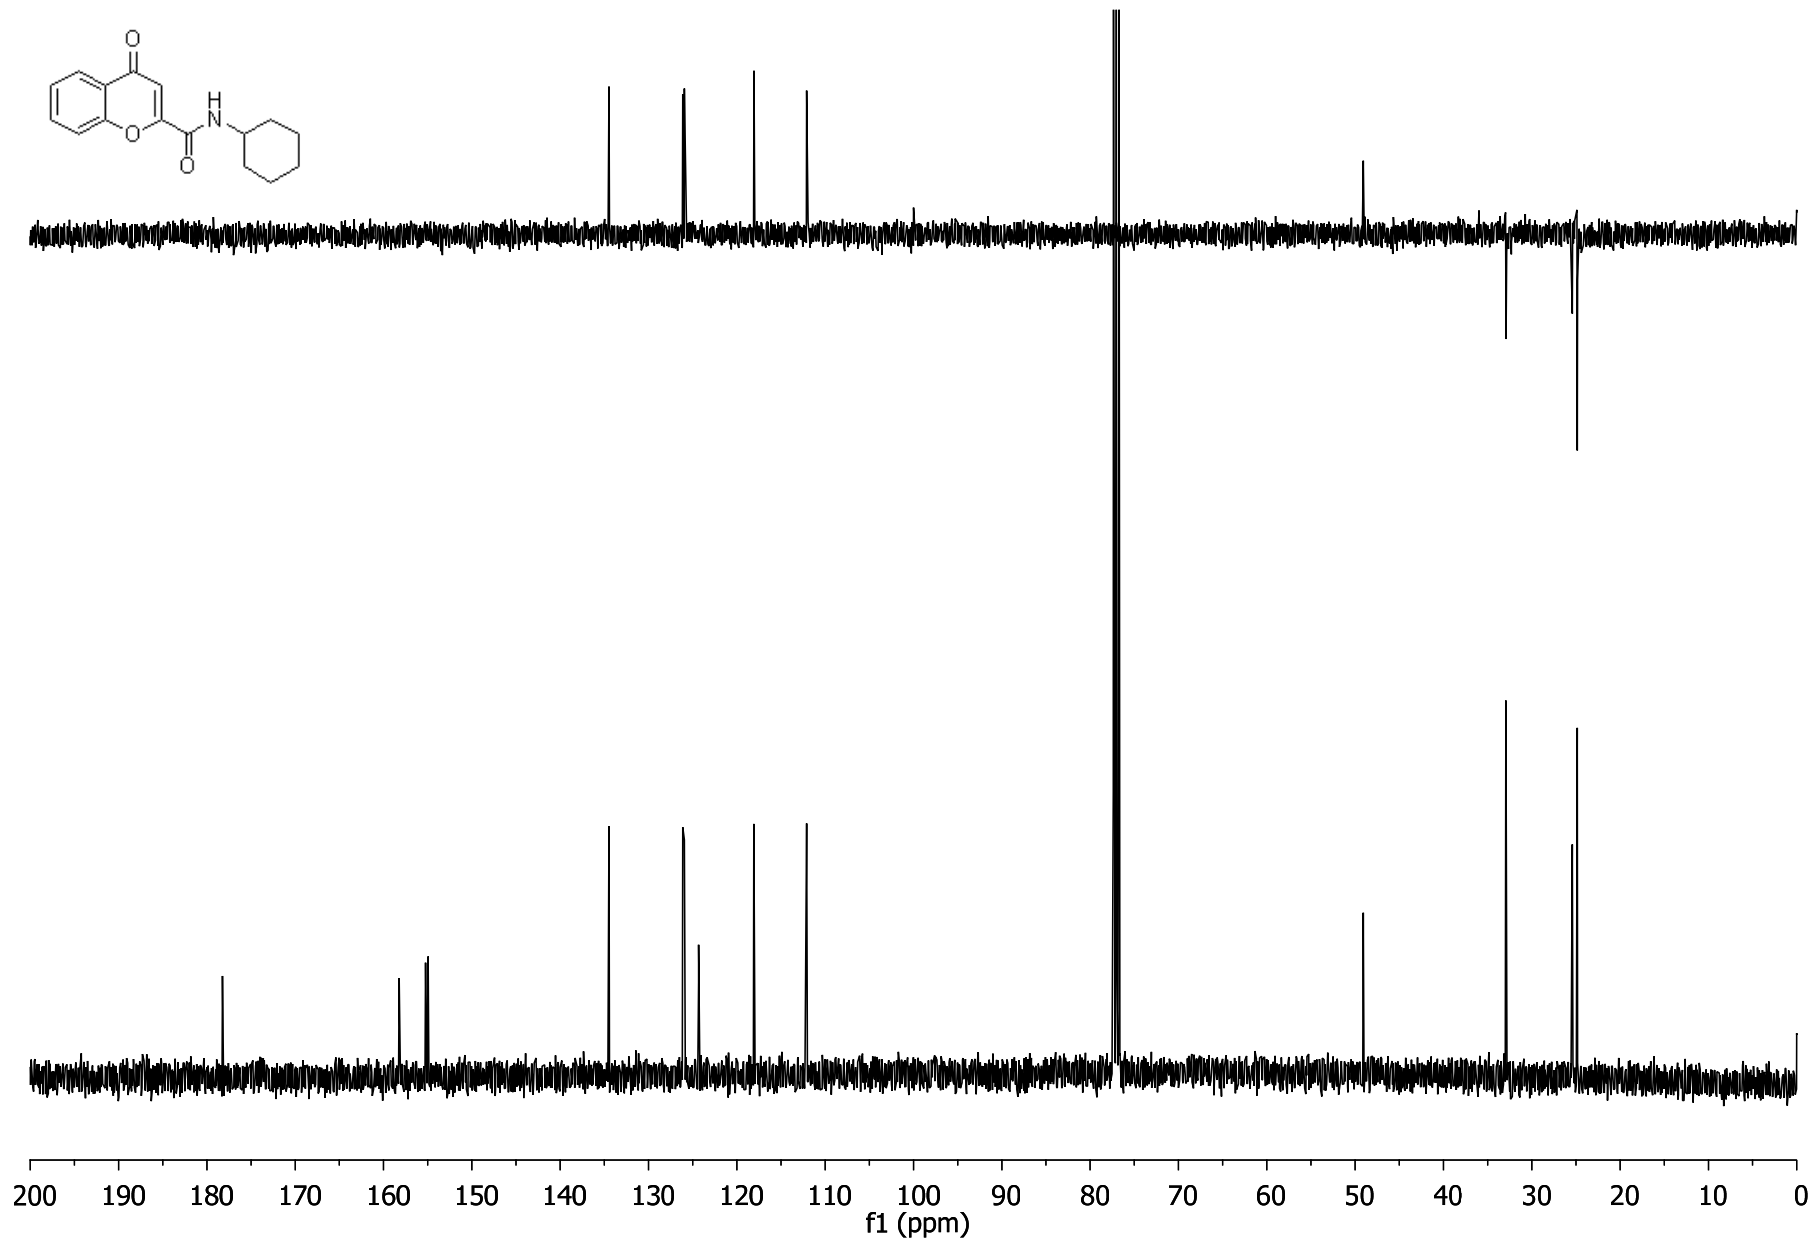

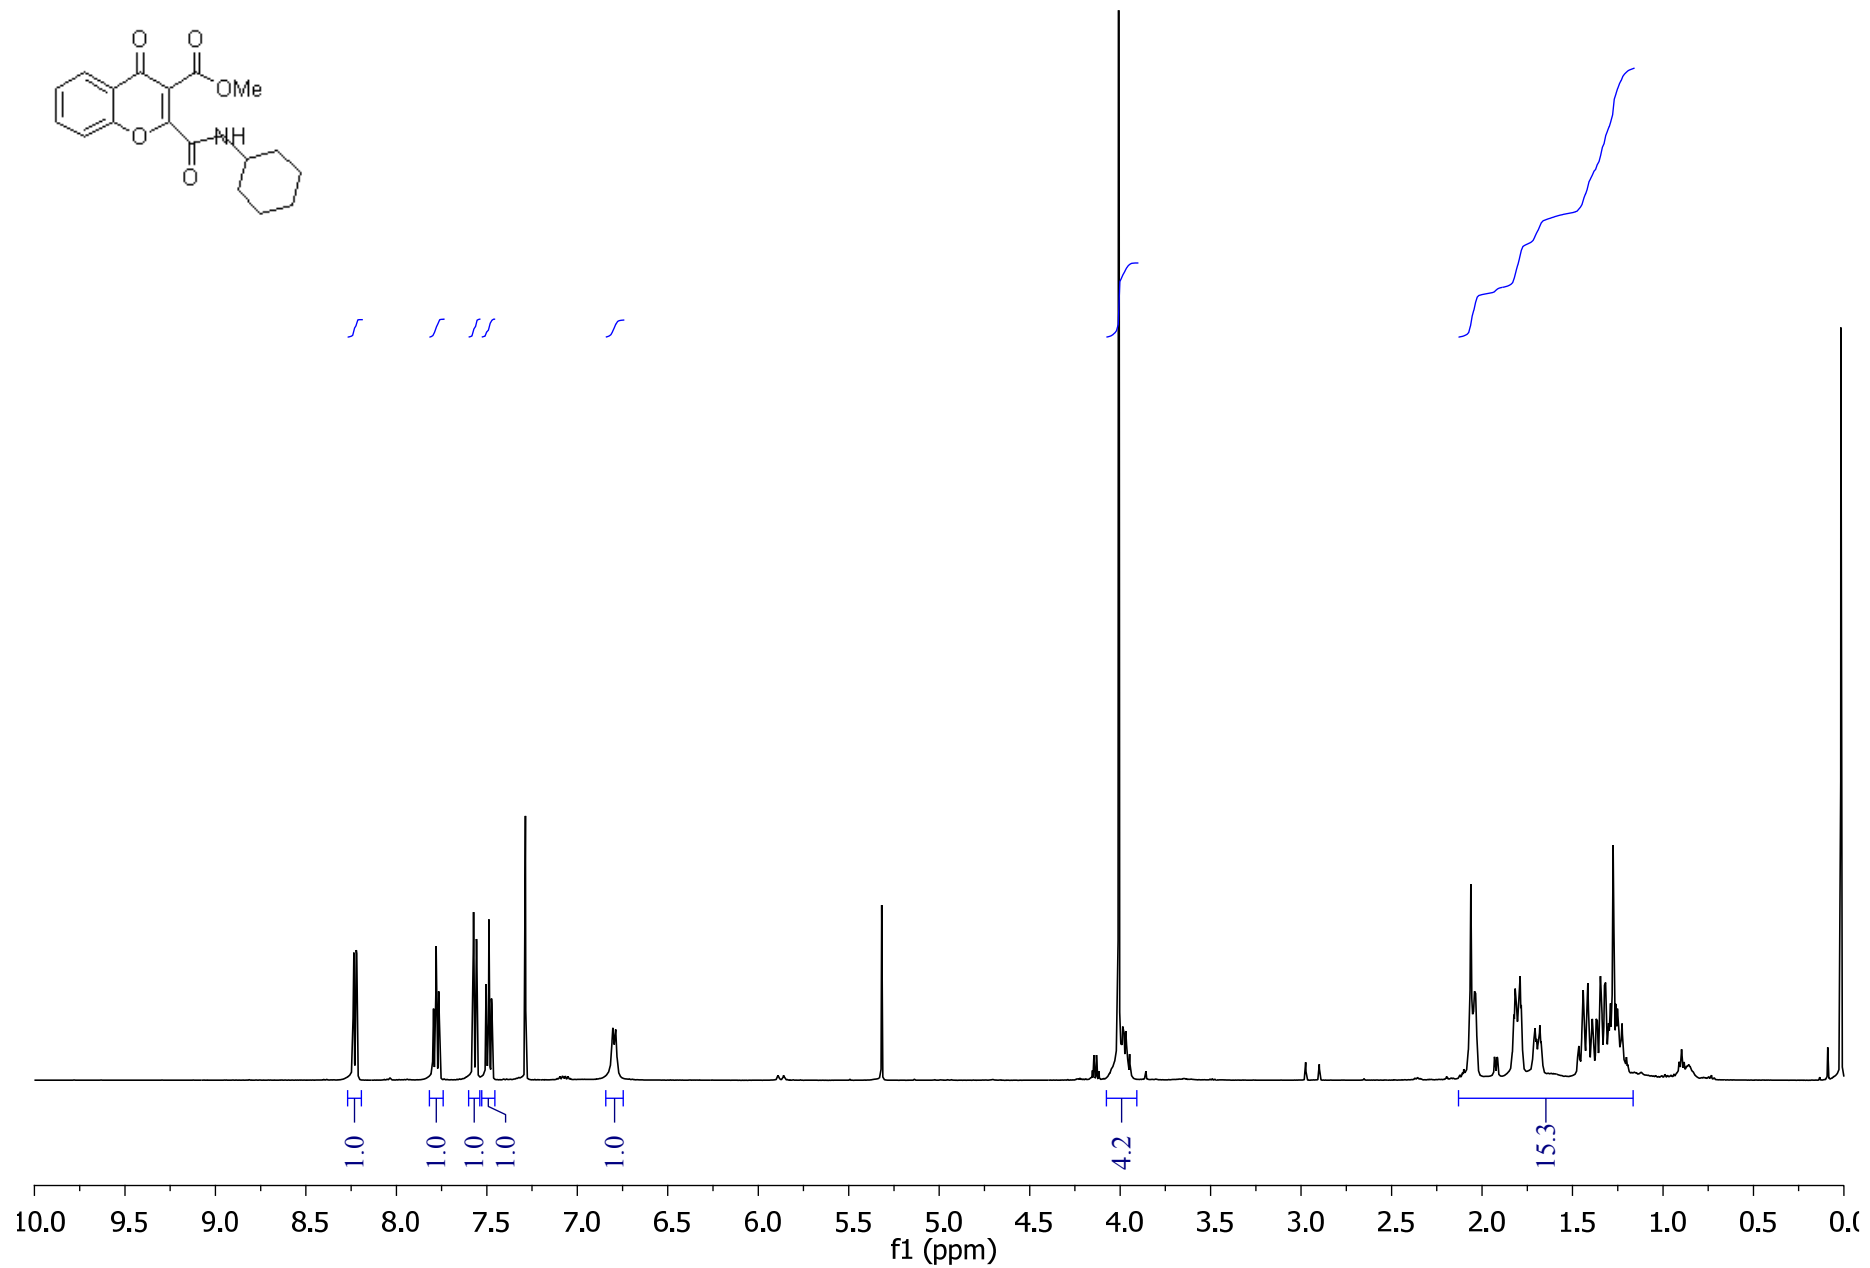

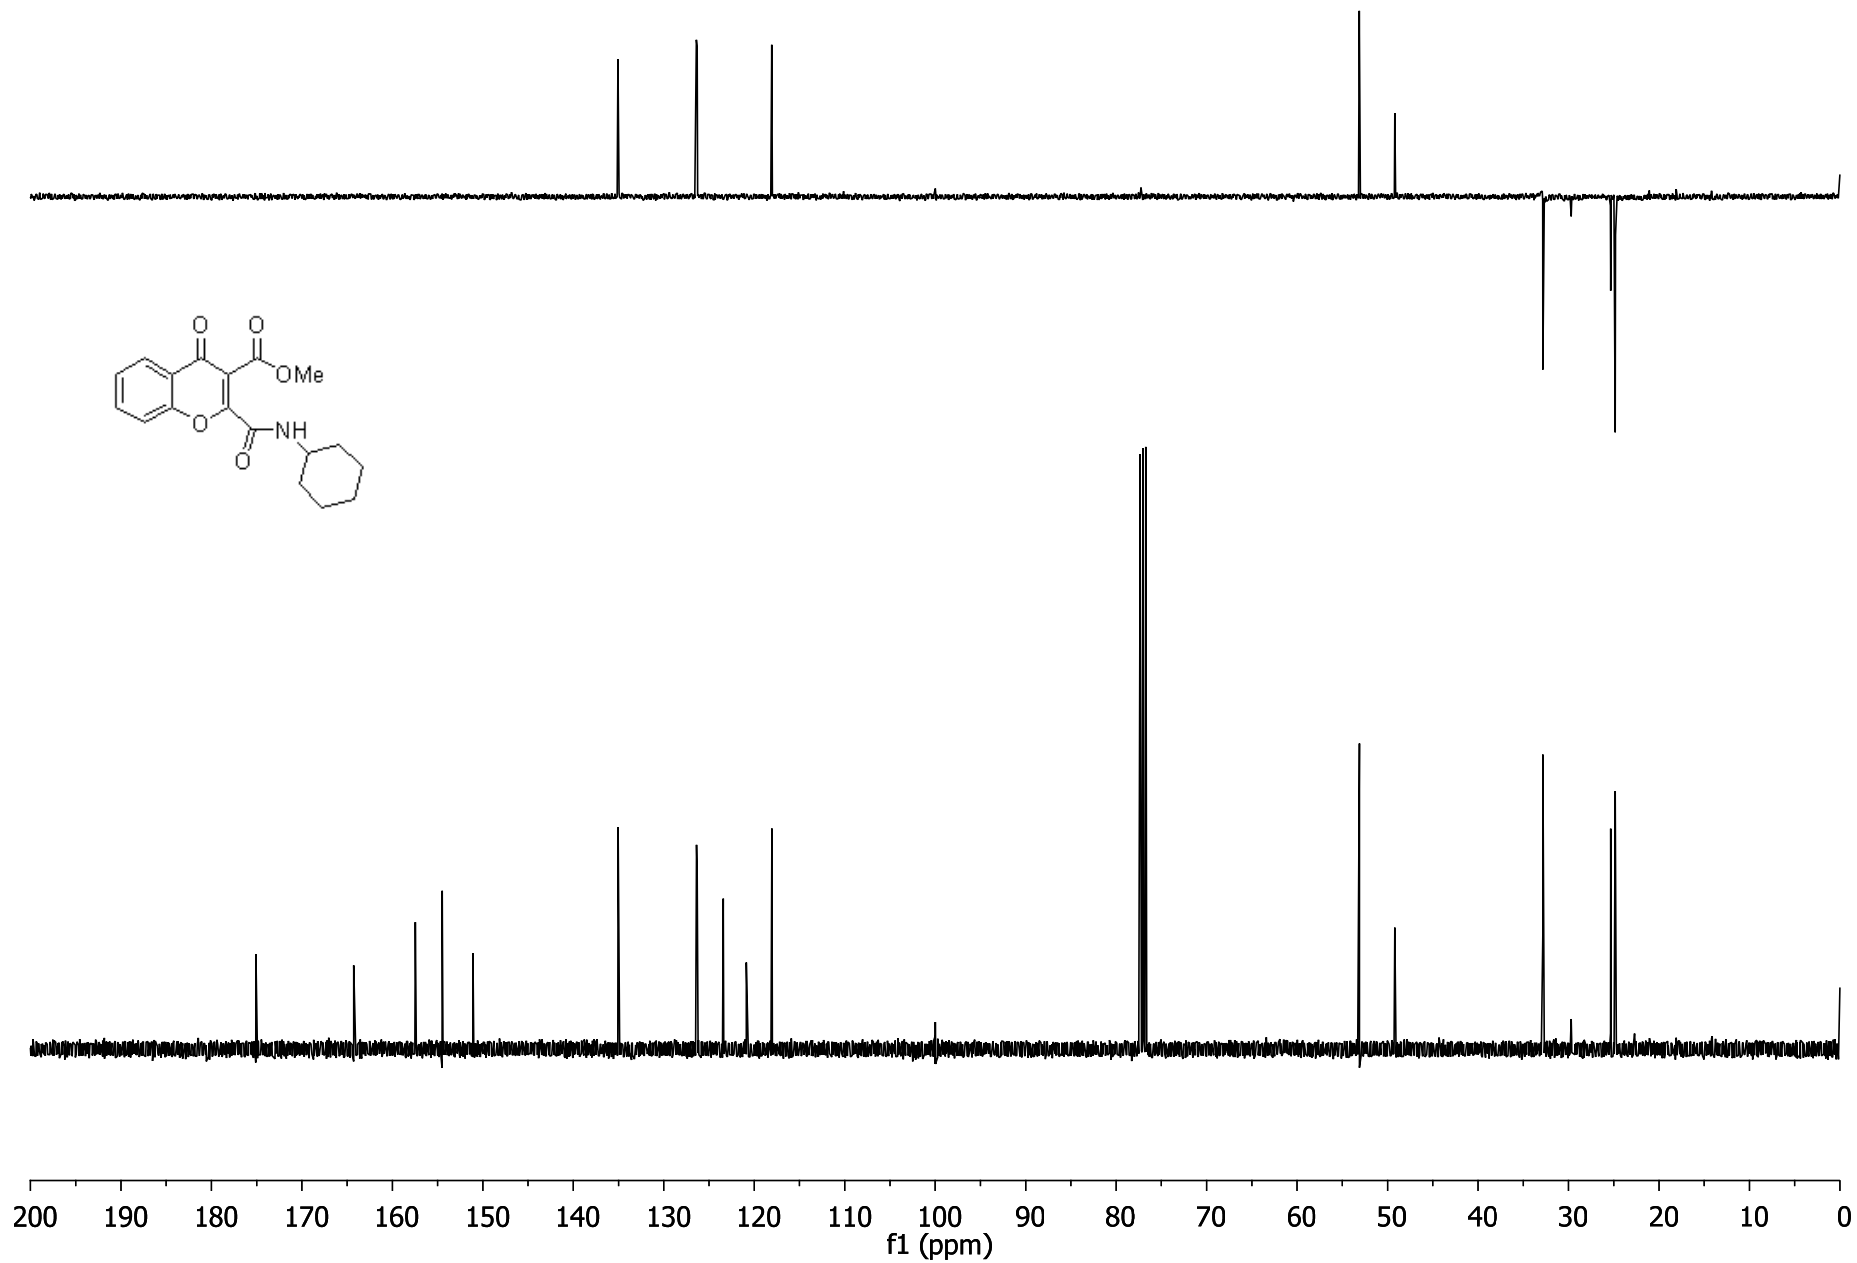



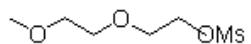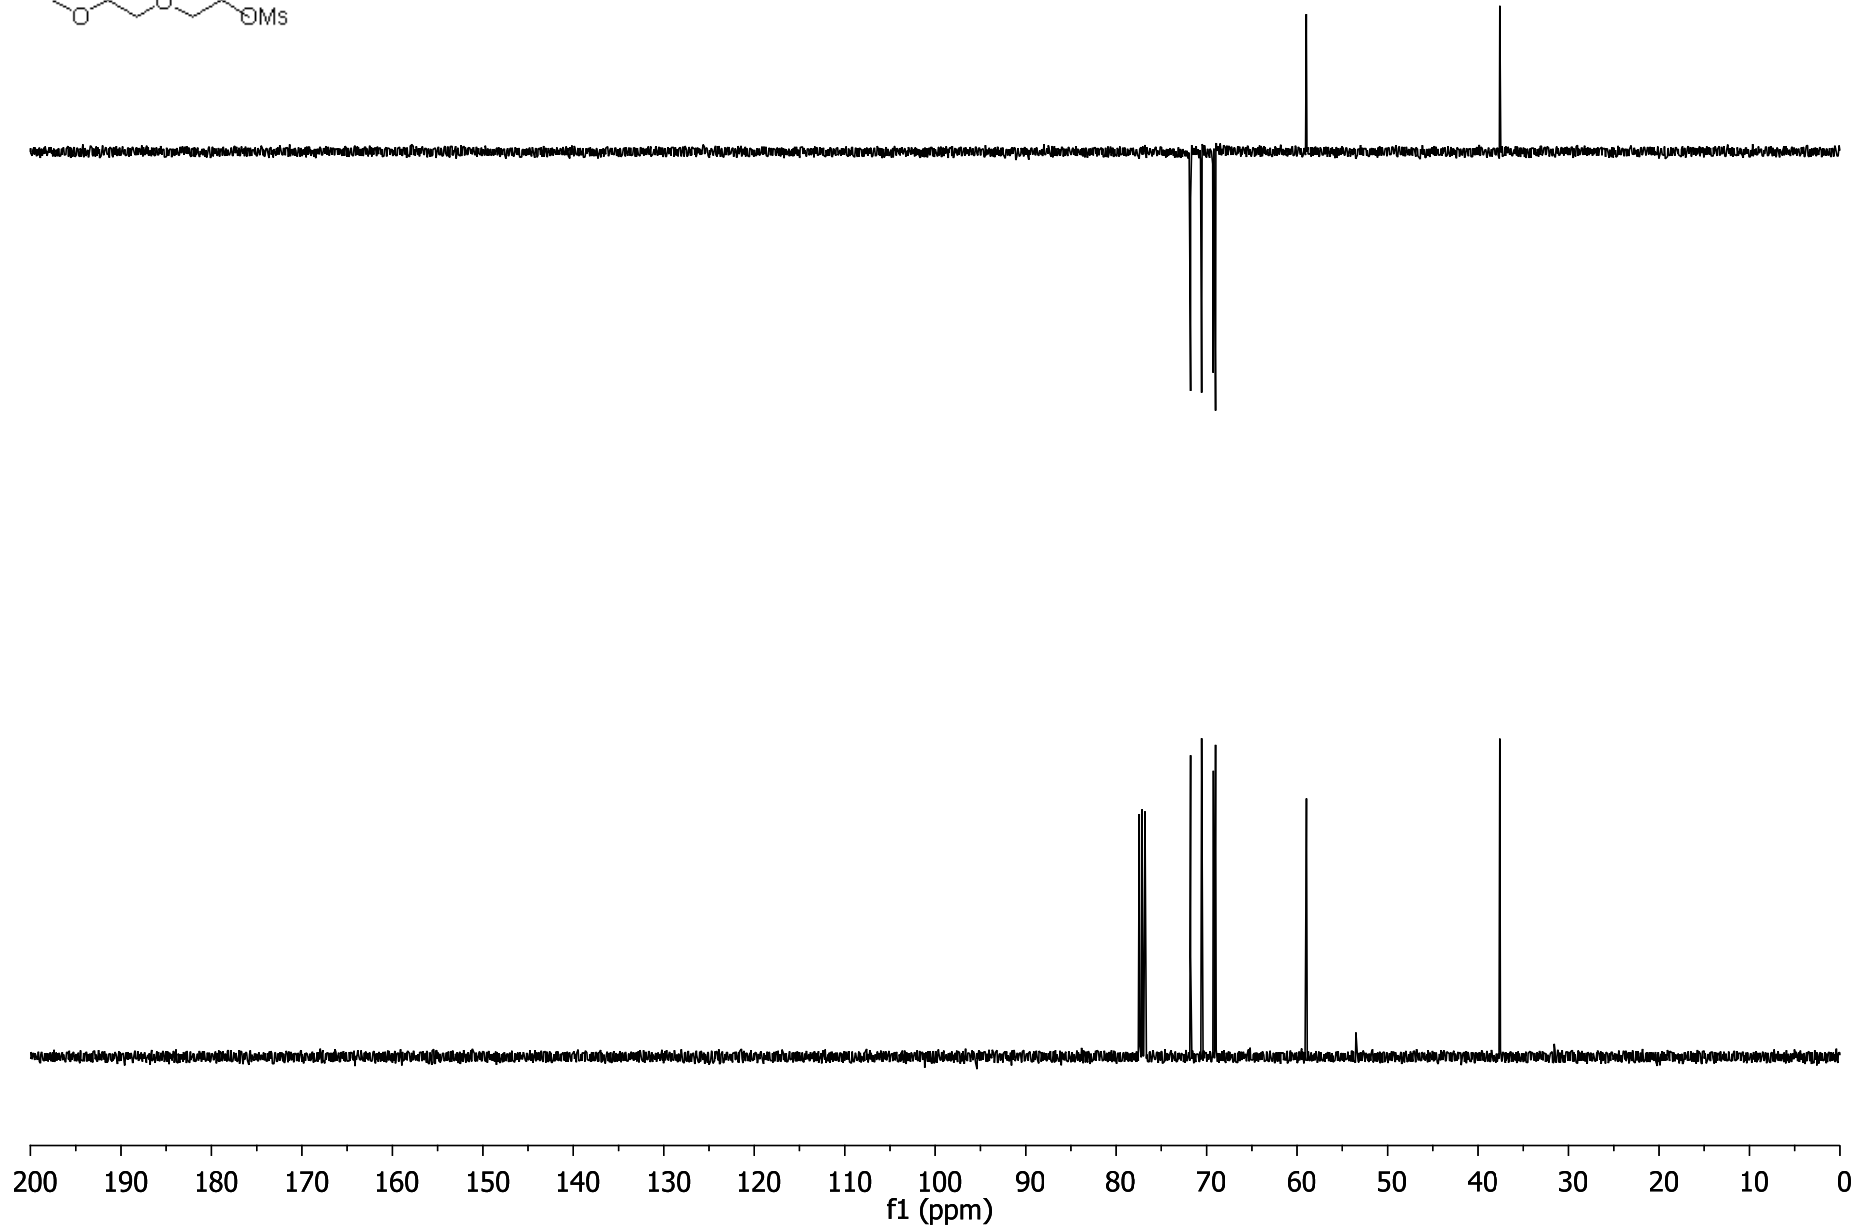

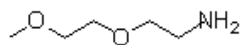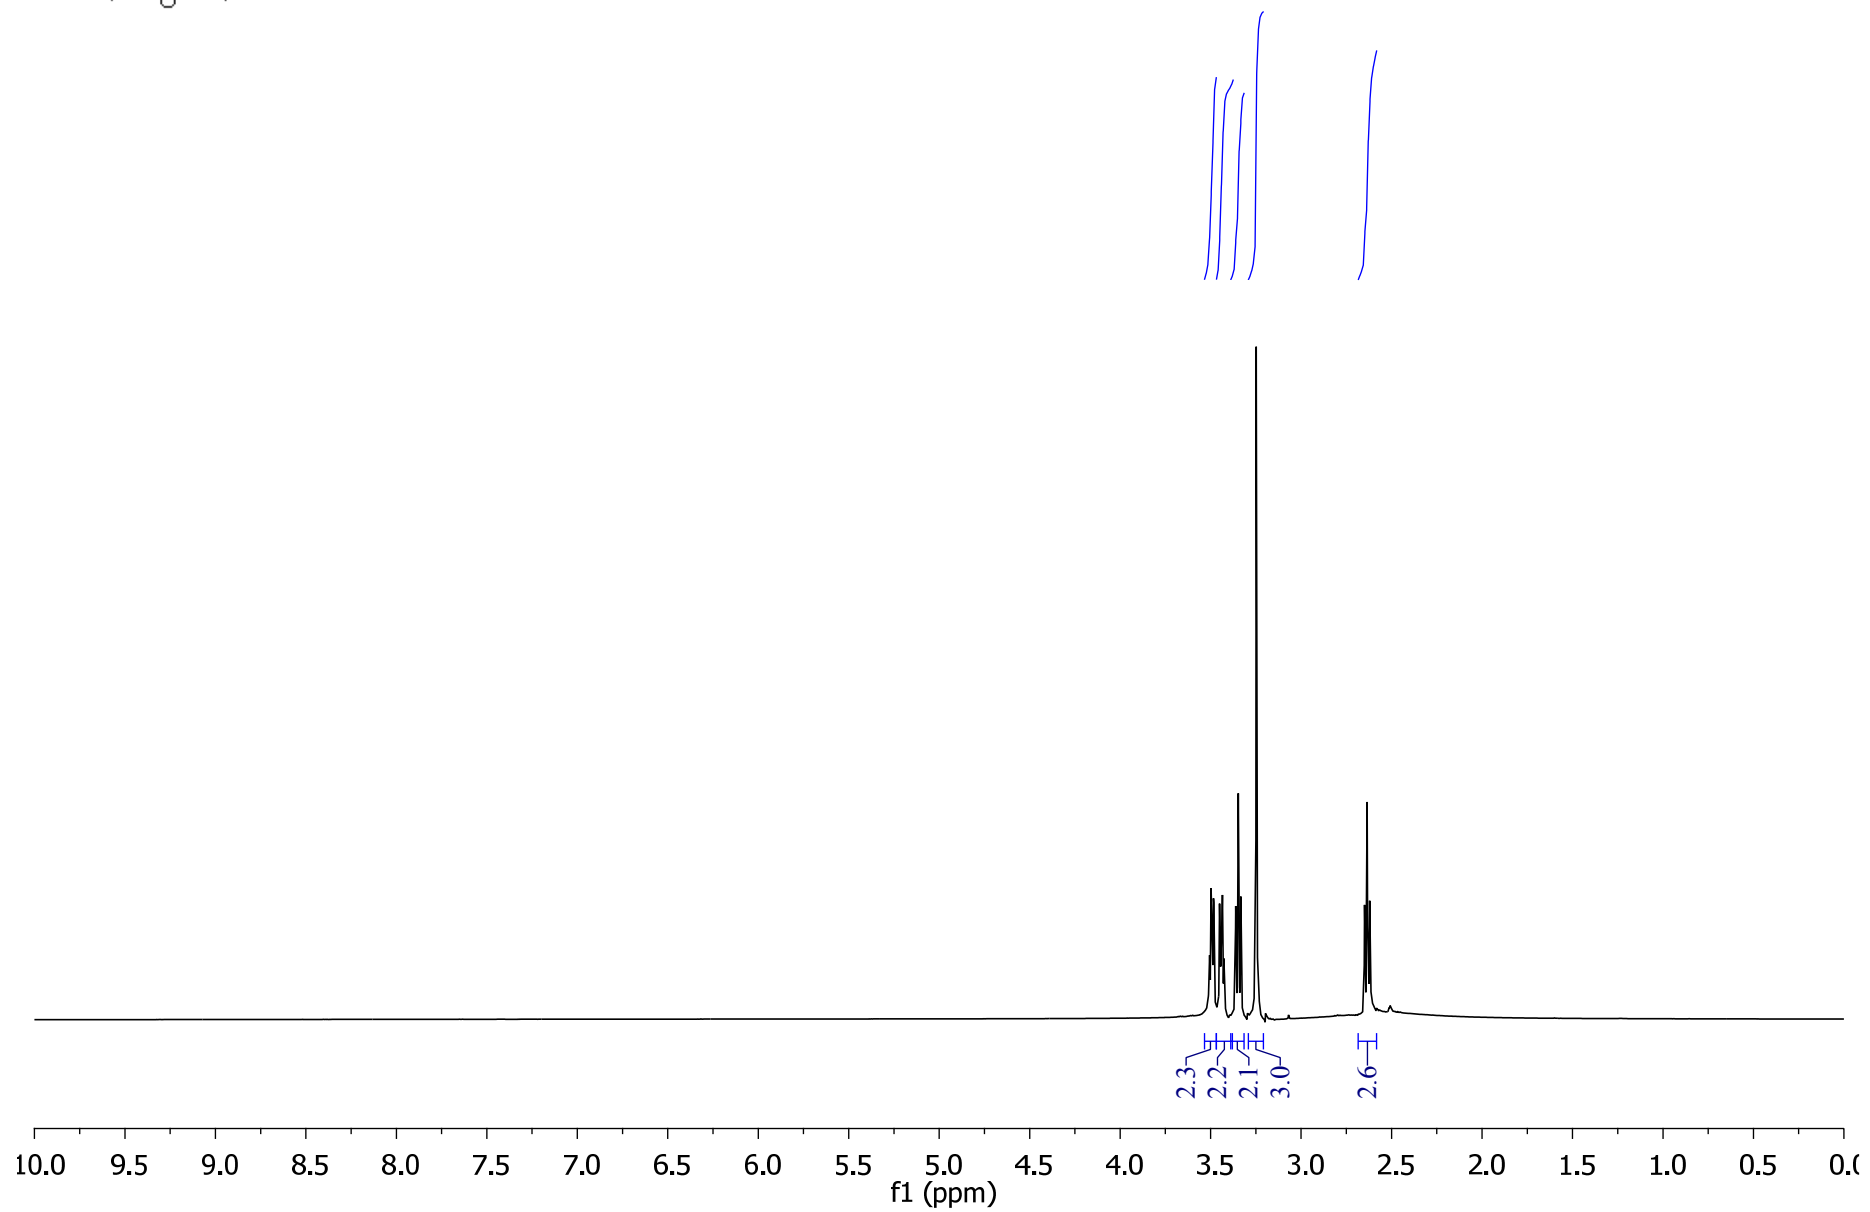

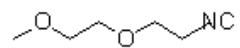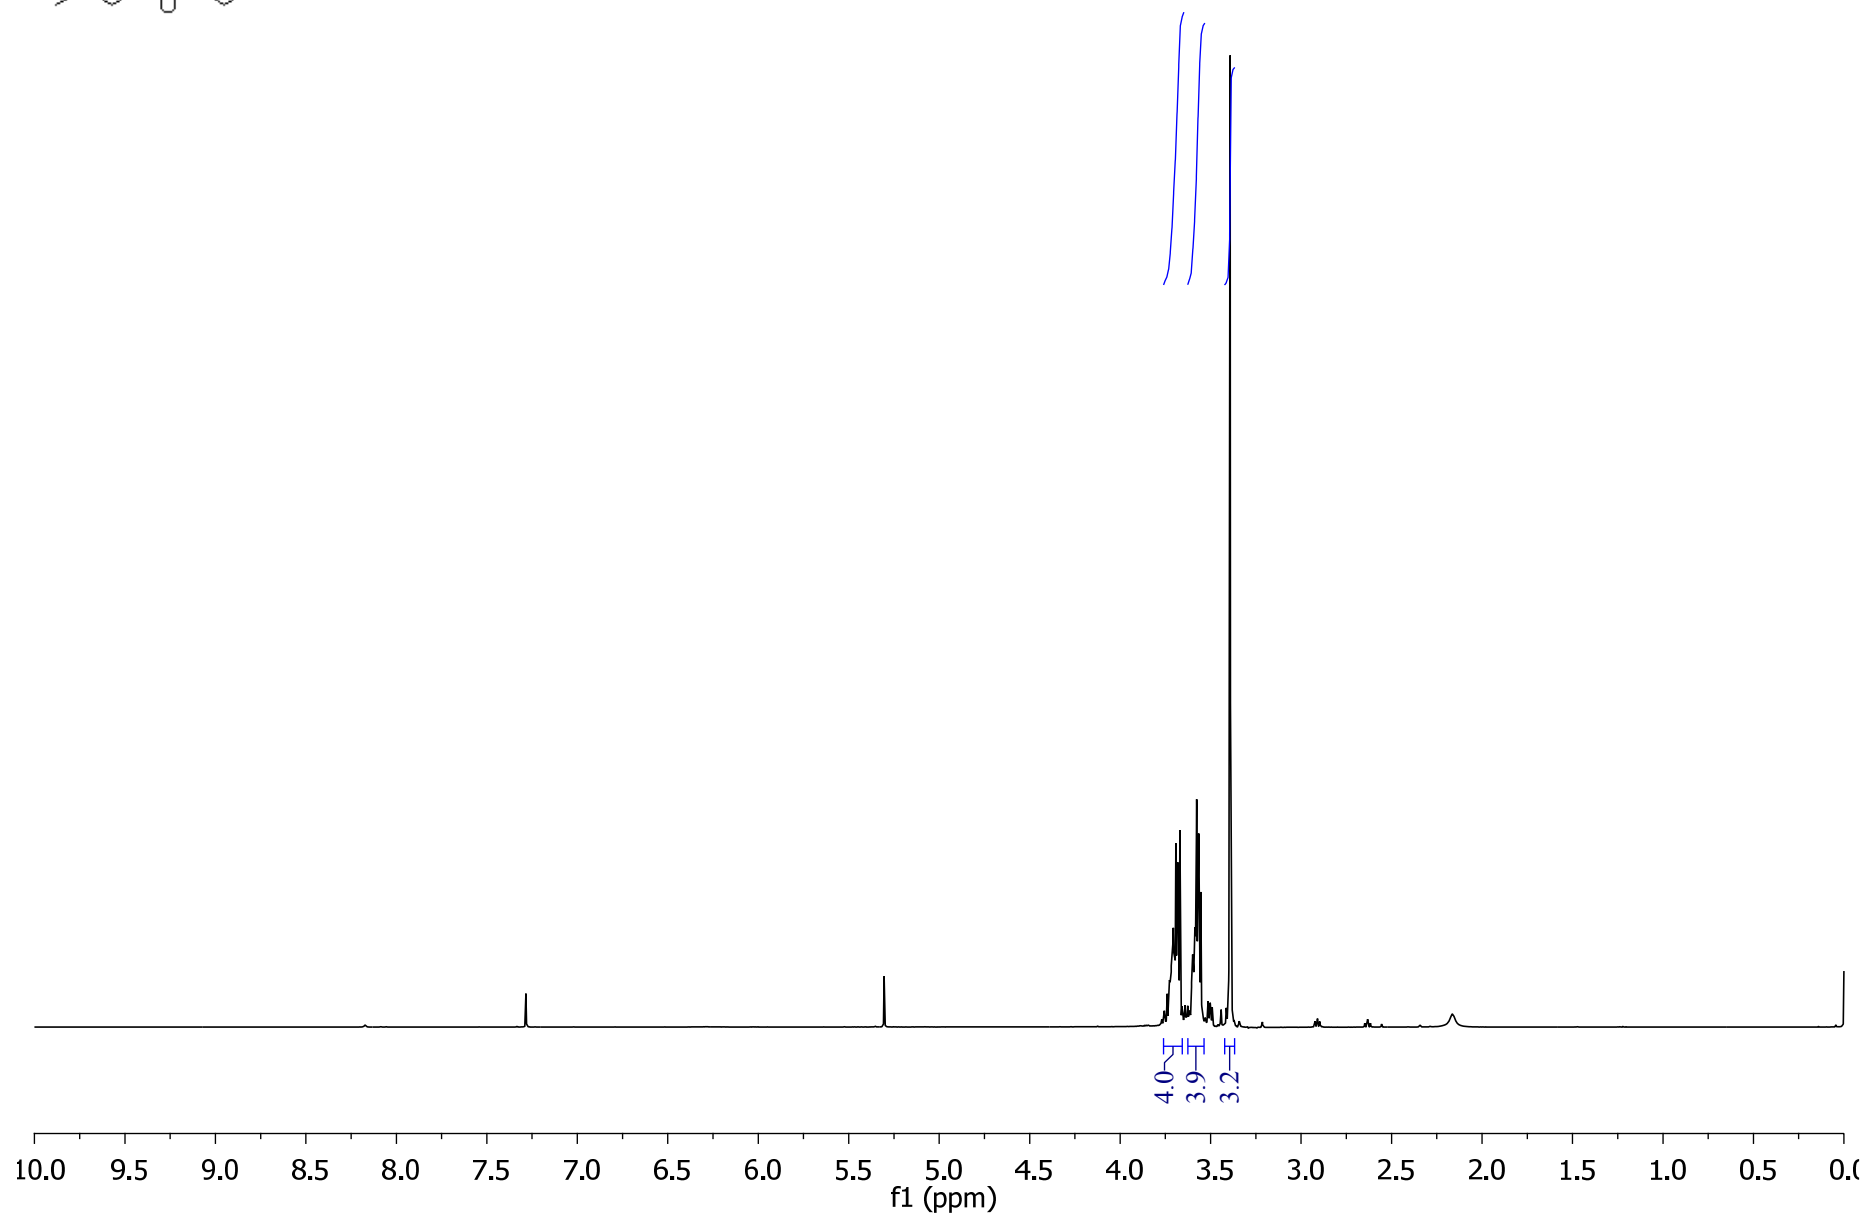



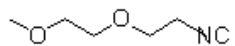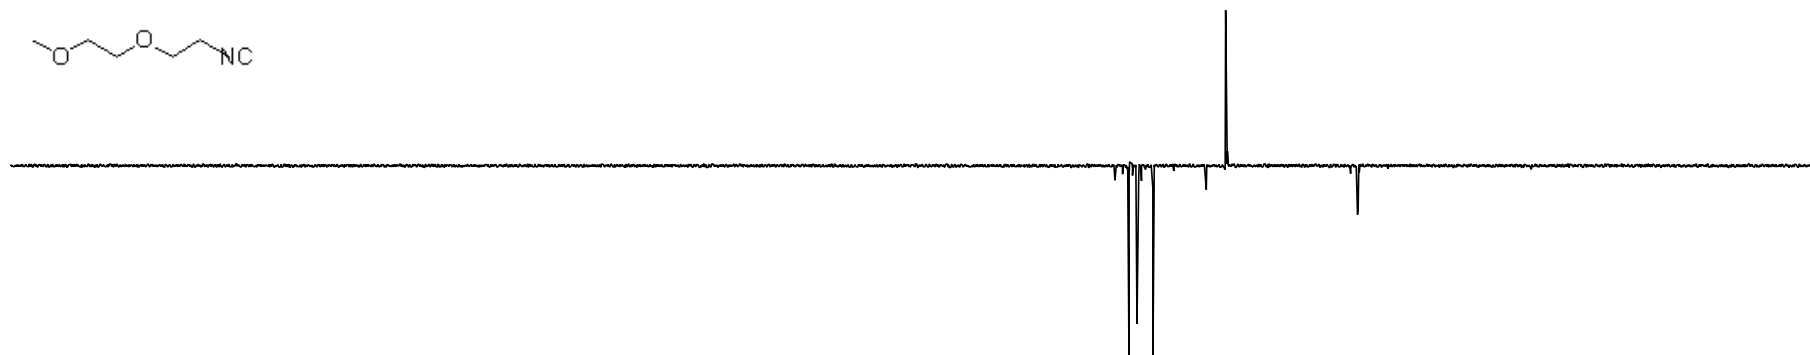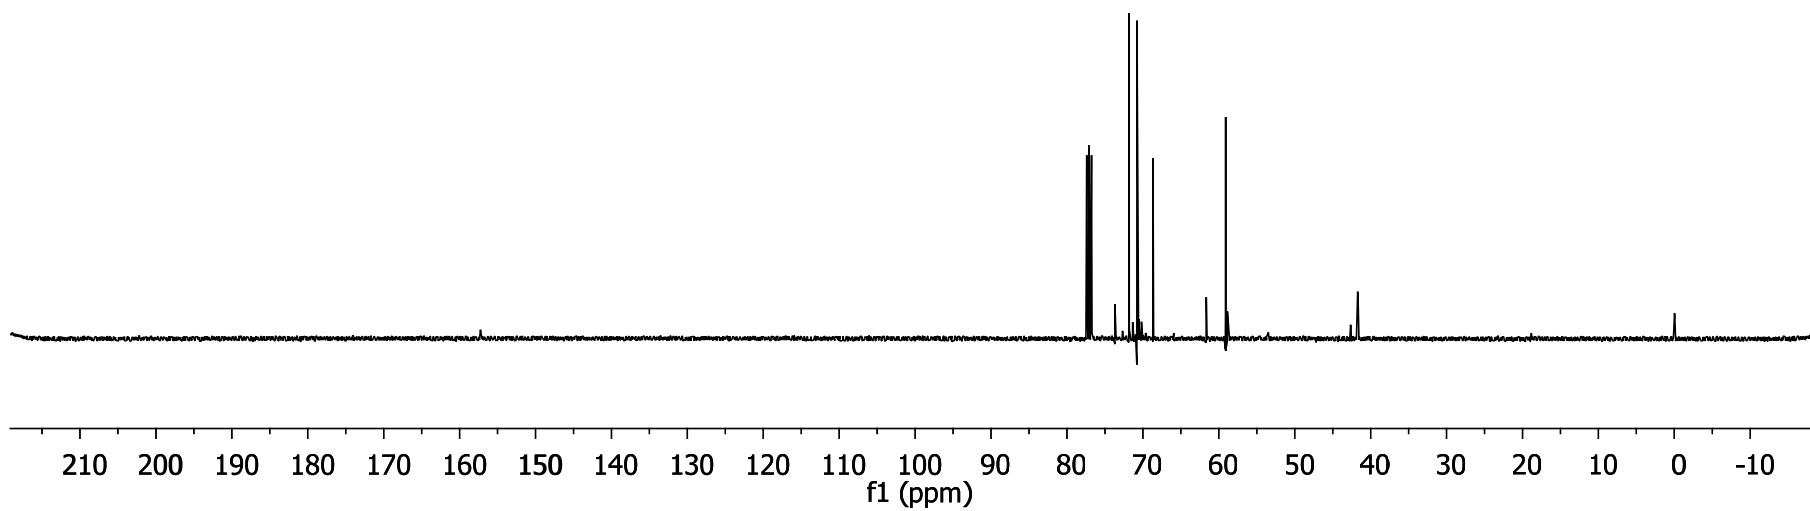



Table S1. Electronic energies and thermodynamic magnitudes of the critical structures involved in the reaction mechanisms found at the B3LYP/6-31G(d) theory level.

| Species                               | E<br>(hartree) | H<br>(hartree) | S<br>(cal K <sup>-1</sup> mol <sup>-1</sup> ) | G<br>(hartree) |
|---------------------------------------|----------------|----------------|-----------------------------------------------|----------------|
| <b>P = 1 atm, T = 298.15 K</b>        |                |                |                                               |                |
| <b>H<sub>2</sub>O</b>                 | -76.408953     | -76.384006     | 45.136                                        | -76.405452     |
| <b>CH<sub>3</sub>OH</b>               | -115.714405    | -115.658697    | 56.733                                        | -115.685652    |
| <b>I</b>                              | -818.308809    | -818.100564    | 113.891                                       | -818.154677    |
| <b>I (H<sub>2</sub>O)</b>             | -894.745898    | -894.510731    | 125.107                                       | -894.570173    |
| <b>IIa</b>                            | -818.315710    | -818.107760    | 115.304                                       | -818.162544    |
| <b>IIa (H<sub>2</sub>O)</b>           | -894.739603    | -894.503929    | 130.544                                       | -894.565955    |
| <b>IIb</b>                            | -818.322330    | -818.113804    | 114.042                                       | -818.167989    |
| <b>IIb (H<sub>2</sub>O)</b>           | -894.755337    | -894.519446    | 126.052                                       | -894.579337    |
| <b>IIc</b>                            | -818.324599    | -818.116548    | 116.658                                       | -818.171976    |
| <b>IIc (H<sub>2</sub>O)</b>           | -894.751409    | -894.515489    | 130.363                                       | -894.577428    |
| <b>TSIIa-IIb</b>                      | -894.694685    | -894.463691    | 120.746                                       | -894.521062    |
| <b>TSI-IIb</b>                        | -818.303761    | -818.100112    | 111.165                                       | -818.152930    |
| <b>TSI-IIb (H<sub>2</sub>O)</b>       | -894.742274    | -894.512725    | 121.624                                       | -894.570513    |
| <b>TSIIb-IIc</b>                      | -894.711196    | -894.480614    | 121.092                                       | -894.538149    |
| <b>IIIa</b>                           | -934.101260    | -933.833267    | 139.242                                       | -933.899425    |
| <b>IIIb1</b>                          | -934.103022    | -933.834729    | 135.078                                       | -933.898909    |
| <b>IIIb2</b>                          | -934.092008    | -933.825746    | 135.199                                       | -933.889984    |
| <b>IIIc</b>                           | -934.101424    | -933.833350    | 139.524                                       | -933.899642    |
| <b>TSIIIb1-IIIb2 (H<sub>2</sub>O)</b> | -1010.50487    | -1010.21392    | 140.255                                       | -1010.28056    |
| <b>TSIIIb1-IIIb2</b>                  | -934.091979    | -933.827773    | 133.222                                       | -933.891071    |
| <b>TSIIIa-IIIb (H<sub>2</sub>O)</b>   | -1010.47907    | -1010.18826    | 142.652                                       | -1010.25604    |
| <b>TSIIIa-IIIb</b>                    | -934.005191    | -933.742822    | 136.938                                       | -933.807885    |
| <b>TSIIIb-IIIc (H<sub>2</sub>O)</b>   | -1010.47663    | -1010.18604    | 141.338                                       | -1010.25319    |
| <b>TSIIIb-IIIc</b>                    | -933.999567    | -933.737277    | 136.955                                       | -933.802348    |

Table S2. Relative electronic energy ( $\Delta E$ ), enthalpy ( $\Delta H$ ), entropy contribution ( $T\Delta S$ ) and Gibbs free energy in gas phase ( $\Delta G_{gas}$ ), in kcal mol<sup>-1</sup>, of the critical structures located for the reaction at the B3LYP/6-31G(d) theory level.

| Species                               | $\Delta E$ | $\Delta H$ | $T\Delta S$ | $\Delta G_{gas}$ |
|---------------------------------------|------------|------------|-------------|------------------|
| <b>P = 1 atm, T = 298.15 K</b>        |            |            |             |                  |
| <b>I (H<sub>2</sub>O)*</b>            | -17.65     | -16.4156   | -10.1       | -6.3             |
| <b>I</b>                              | 0.0        | 0.0000     | 0.0         | 0.0              |
| <b>IIa</b>                            | -4.33      | -4.5153    | 0.4         | -4.9             |
| <b>IIa (H<sub>2</sub>O)</b>           | -13.71     | -12.15     | -8.5        | -3.7             |
| <b>IIb</b>                            | -8.48      | -8.3083    | 0.0         | -8.4             |
| <b>IIb (H<sub>2</sub>O)</b>           | -23.58     | -21.8845   | -9.8        | -12.1            |
| <b>IIc</b>                            | -9.91      | -10.0298   | 0.8         | -10.9            |
| <b>IIc (H<sub>2</sub>O)</b>           | -21.11     | -19.40     | -8.5        | -10.9            |
| <b>TSIIa-IIb</b>                      | 14.48      | 13.1024    | -11.4       | 24.5             |
| <b>TSI-IIb</b>                        | 3.17       | 0.2841     | -0.8        | 1.1              |
| <b>TSI-IIb (H<sub>2</sub>O)</b>       | -15.38     | -17.6672   | -11.2       | -6.5             |
| <b>TSIIb-IIc</b>                      | 4.12       | 2.4828     | -11.3       | 13.8             |
| <b>IIIa</b>                           | 0.1030     | 0.0522     | -0.1        | 0.1              |
| <b>IIIb1</b>                          | -1.0030    | -0.8655    | -1.3        | 0.5              |
| <b>IIIb2</b>                          | 5.9083     | 4.7713     | -1.3        | 6.1              |
| <b>IIIc*</b>                          | 0.0000     | 0.0000     | 0.0         | 0.0              |
| <b>TSIIIb1-IIIb2 (H<sub>2</sub>O)</b> | 3.4502     | 2.1581     | -13.2       | 15.4             |
| <b>TSIIIb1-IIIb2</b>                  | 5.9268     | 3.4996     | -1.9        | 5.4              |
| <b>TSIIIa-IIIb (H<sub>2</sub>O)</b>   | 19.6443    | 18.2569    | -12.5       | 30.8             |
| <b>TSIIIa-IIIb</b>                    | 60.3874    | 56.8074    | -0.8        | 57.6             |
| <b>TSIIIb-IIIc (H<sub>2</sub>O)</b>   | 21.1766    | 19.6518    | -12.9       | 32.6             |
| <b>TSIIIb-IIIc</b>                    | 63.9161    | 60.2866    | -0.8        | 61.1             |

\* All energies are relatives to these both species **I (H<sub>2</sub>O)** and **IIIc**.

Table S3. Single-point energies on the B3LYP/Basis of the B3LYP/6-31G\* optimized structures located for the reaction pathways at different levels of theory.

| Species                                   | B3LYP/<br>6-31G* | B3LYP/<br>6-31G** | B3LYP/<br>6-31++G** | B3LYP/<br>6-311++G** |
|-------------------------------------------|------------------|-------------------|---------------------|----------------------|
| <b>P = 1 atm. T = 298.15 K</b>            |                  |                   |                     |                      |
| <b>H<sub>2</sub>O</b>                     | -76.408953       | -76.419710        | -76.434014          | -76.458420           |
| <b>CH<sub>3</sub>OH</b>                   | -115.714405      | -115.723937       | -115.734838         | -115.764841          |
| <b>I</b>                                  | -818.308809      | -818.326019       | -818.355803         | -818.534843          |
| <b>I (H<sub>2</sub>O)</b>                 | -894.745898      | -894.774453       | -894.812170         | -895.014488          |
| <b>IIa</b>                                | -818.315710      | -818.3287765      | -818.357181         | -818.537155          |
| <b>IIa (H<sub>2</sub>O)</b>               | -894.739603      | -894.763385       | -894.800851         | -895.004658          |
| <b>IIb</b>                                | -818.322330      | -818.339512       | -818.369248         | -818.548514          |
| <b>IIb (H<sub>2</sub>O)</b>               | -894.755337      | -894.783323       | -894.821271         | -895.024036          |
| <b>IIc</b>                                | -818.3245998     | -818.337698       | -818.367142         | -818.546804          |
| <b>IIc (H<sub>2</sub>O)</b>               | -894.751409      | -894.775314       | -894.812519         | -895.015889          |
| <b>TSIIa-IIb</b>                          | -894.694685      | -894.721548       | -894.755302         | -894.957939          |
| <b>TSI-IIb</b>                            | -818.303761      | -818.322625       | -818.351556         | -818.529617          |
| <b>TSI-IIb (H<sub>2</sub>O)</b>           | -894.742274      | -894.772774       | -894.809835         | -895.010920          |
| <b>TSIIb-IIc</b>                          | -894.711196      | -894.738489       | -894.771786         | -894.973775          |
| <b>IIIa</b>                               | -934.101260      | -934.121818       | -934.157662         | -934.367956          |
| <b>IIIb1</b>                              | -934.092008      | -934.117987       | -934.154042         | -934.362368          |
| <b>IIIb2</b>                              | -934.103022      | -934.128019       | -934.164447         | -934.373619          |
| <b>IIIc</b>                               | -934.101424      | -934.121980       | -934.158211         | -934.368455          |
| <b>TSIIIb1-IIIb2<br/>(H<sub>2</sub>O)</b> | -1010.504879     | -1010.542059      | -1010.581937        | -1010.813718         |
| <b>TSIIIb1-IIIb2</b>                      | -934.091979      | -934.118299       | -934.154348         | -934.362498          |
| <b>TSIIIa-IIIb (H<sub>2</sub>O)</b>       | -1010.479072     | -1010.513619      | -1010.553100        | -1010.785813         |
| <b>TSIIIa-IIIb</b>                        | -934.005191      | -934.029952       | -934.067473         | -934.276356          |
| <b>TSIIIb-IIIc (H<sub>2</sub>O)</b>       | -1010.476630     | -1010.511605      | -1010.551776        | -1010.784532         |
| <b>TSIIIb-IIIc</b>                        | -933.999567      | -934.024341       | -934.061777         | -934.270697          |

Table S4. Relative energies on the B3LYP/Basis for the reaction pathways at different levels of theory.

| Species                               | B3LYP/<br>6-31G* | B3LYP/<br>6-31G** | B3LYP/<br>6-31++G** | B3LYP/<br>6-311++G** |
|---------------------------------------|------------------|-------------------|---------------------|----------------------|
| <b>P = 1 atm. T = 298.15 K</b>        |                  |                   |                     |                      |
| <b>I (H<sub>2</sub>O)*</b>            | -17.655          | -18.024           | -14.027             | -13.318              |
| <b>I</b>                              | 0.000            | 0.000             | 0.000               | 0.000                |
| <b>IIa</b>                            | -4.330           | -1.730            | -0.865              | -1.450               |
| <b>IIa (H<sub>2</sub>O)</b>           | -13.705          | -11.079           | -6.924              | -7.150               |
| <b>IIb</b>                            | -8.485           | -8.467            | -8.437              | -8.579               |
| <b>IIb (H<sub>2</sub>O)</b>           | -23.578          | -23.591           | -19.738             | -19.310              |
| <b>IIc</b>                            | -9.909           | -7.328            | -7.115              | -7.505               |
| <b>IIc (H<sub>2</sub>O)</b>           | -21.113          | -18.565           | -14.25              | -14.20               |
| <b>TSIIa-IIb</b>                      | 14.482           | 15.174            | 21.658              | 22.167               |
| <b>TSI-IIb</b>                        | 3.168            | 2.130             | 2.665               | 3.280                |
| <b>TSI-IIb (H<sub>2</sub>O)</b>       | -15.381          | -16.971           | -12.562             | -11.079              |
| <b>TSIIb-IIc</b>                      | 4.121            | 4.543             | 11.314              | 12.229               |
| <b>IIIa</b>                           | 0.103            | 0.102             | 0.345               | 0.313                |
| <b>IIIb1</b>                          | -1.003           | -3.789            | -3.913              | -3.240               |
| <b>IIIb2</b>                          | 5.908            | 2.506             | 2.616               | 3.820                |
| <b>IIIc*</b>                          | 0.000            | 0.000             | 0.000               | 0.000                |
| <b>TSIIIb1-IIIb2 (H<sub>2</sub>O)</b> | 3.450            | -0.231            | 6.456               | 8.256                |
| <b>TSIIIb1-IIIb2</b>                  | 5.927            | 2.310             | 2.424               | 3.738                |
| <b>TSIIIa-IIIb (H<sub>2</sub>O)</b>   | 19.644           | 17.615            | 24.551              | 25.767               |
| <b>TSIIIa-IIIb</b>                    | 60.387           | 57.749            | 56.939              | 57.793               |
| <b>TSIIIb-IIIc (H<sub>2</sub>O)</b>   | 21.177           | 18.879            | 25.382              | 26.571               |
| <b>TSIIIb-IIIc</b>                    | 63.916           | 61.270            | 60.513              | 61.344               |

\* All energies are relative to these both species **I (H<sub>2</sub>O)** and **IIIc**.

B3LYP/6-31G(d) optimized cartesian coordinates of the critical structures located in the present work.

### CH<sub>3</sub>OH

E = -115.714405144

|   |           |           |           |
|---|-----------|-----------|-----------|
| C | 0.662325  | -0.019545 | 0.000000  |
| H | 1.079718  | 0.991033  | -0.000001 |
| H | 1.036957  | -0.543658 | -0.893148 |
| H | 1.036957  | -0.543656 | 0.893149  |
| O | -0.749169 | 0.122497  | 0.000000  |
| H | -1.134236 | -0.766420 | 0.000000  |

### H<sub>2</sub>O

E = -76.4089533236

|   |          |           |           |
|---|----------|-----------|-----------|
| O | 0.000000 | 0.000000  | 0.119720  |
| H | 0.000000 | 0.761560  | -0.478879 |
| H | 0.000000 | -0.761560 | -0.478879 |

### I

E = -818.308809299

|   |           |           |           |
|---|-----------|-----------|-----------|
| O | -0.012279 | -1.300645 | -0.154971 |
| C | -0.943808 | -0.484732 | 0.583149  |
| C | -0.653842 | 0.962626  | 0.436496  |
| C | 0.658294  | 1.497907  | 0.265492  |
| C | 1.698071  | 0.447381  | 0.168792  |
| C | 1.302468  | -0.892185 | -0.070427 |
| C | -1.756950 | 1.578694  | -0.073531 |
| O | -2.810057 | 0.766358  | -0.274137 |
| C | -2.380759 | -0.559615 | 0.025878  |
| C | 3.063013  | 0.765918  | 0.173966  |
| C | 4.025125  | -0.215086 | -0.031346 |
| C | 3.620320  | -1.533780 | -0.273480 |
| C | 2.270093  | -1.873841 | -0.299218 |
| N | -3.197602 | -1.485408 | -0.162548 |
| C | -2.822700 | -2.858263 | 0.132807  |
| O | 0.858577  | 2.714955  | 0.072876  |
| H | -1.824230 | -2.983771 | 0.569580  |
| H | 3.337997  | 1.804157  | 0.333869  |
| H | 1.945703  | -2.891504 | -0.491093 |
| H | -2.866802 | -3.434376 | -0.797994 |
| H | 4.364690  | -2.307365 | -0.441860 |
| H | 5.080537  | 0.039105  | -0.014640 |
| H | -3.573377 | -3.281706 | 0.808912  |
| H | -0.931380 | -0.847690 | 1.622456  |
| O | -1.870003 | 2.829599  | -0.442050 |
| H | -0.955786 | 3.208723  | -0.296611 |

### I (H<sub>2</sub>O)

E = -894.745897507

|   |           |           |           |
|---|-----------|-----------|-----------|
| O | 0.505036  | -1.523475 | -0.275572 |
| C | -0.585969 | -0.963241 | 0.472140  |
| C | -0.796894 | 0.499825  | 0.210397  |
| C | 0.358507  | 1.353057  | 0.187244  |
| C | 1.640752  | 0.594203  | 0.136183  |
| C | 1.655885  | -0.787409 | -0.154059 |
| C | -2.117251 | 0.660230  | -0.171942 |
| O | -2.787805 | -0.519983 | -0.254387 |
| C | -1.919638 | -1.575303 | 0.053804  |
| C | 2.864987  | 1.275167  | 0.230389  |
| C | 4.069823  | 0.609349  | 0.048478  |
| C | 4.063274  | -0.757864 | -0.258811 |
| C | 2.864585  | -1.456451 | -0.364788 |
| N | -2.360205 | -2.744592 | -0.026302 |
| C | -1.509372 | -3.872027 | 0.313772  |
| O | 0.385254  | 2.601139  | 0.143089  |
| H | -0.524189 | -3.608862 | 0.718041  |
| H | 2.833355  | 2.340791  | 0.432975  |
| H | 2.841426  | -2.516172 | -0.597786 |
| H | -1.359508 | -4.477832 | -0.587128 |
| H | 5.001335  | -1.284949 | -0.411093 |
| H | 5.010072  | 1.145963  | 0.132079  |
| H | -2.043068 | -4.499116 | 1.036484  |
| H | -0.385350 | -1.179617 | 1.534501  |
| O | -2.864242 | 1.666416  | -0.485238 |
| H | -2.451391 | 2.596776  | -0.300494 |
| H | -2.102024 | 4.240172  | 0.891906  |
| O | -1.852648 | 3.947714  | 0.001426  |
| H | -0.916109 | 3.603275  | 0.083251  |

### IIa

E = -818.315709914

|   |           |           |           |
|---|-----------|-----------|-----------|
| O | 0.081212  | 1.305763  | 0.179249  |
| C | -0.857660 | 0.362726  | -0.306118 |
| C | -0.718742 | -0.983153 | 0.396038  |
| C | 0.622367  | -1.597899 | 0.018685  |
| C | 1.679115  | -0.542566 | -0.038427 |
| C | 1.374275  | 0.831893  | 0.098340  |
| C | -2.063845 | -1.625068 | 0.110329  |
| O | -2.964532 | -0.582551 | -0.084149 |
| C | -2.333740 | 0.671260  | -0.104369 |

|   |           |           |           |
|---|-----------|-----------|-----------|
| C | 3.027546  | -0.924989 | -0.145010 |
| C | 4.043538  | 0.018637  | -0.100187 |
| C | 3.720419  | 1.373769  | 0.057335  |
| C | 2.394402  | 1.784073  | 0.152155  |
| N | -3.043829 | 1.696724  | -0.007289 |
| C | -2.479229 | 3.033805  | -0.095990 |
| O | 0.830212  | -2.780206 | -0.159334 |
| H | -1.404287 | 3.075861  | -0.299292 |
| H | 3.240623  | -1.984575 | -0.247881 |
| H | 2.128655  | 2.831165  | 0.254662  |
| H | -2.681425 | 3.557243  | 0.845445  |
| H | 4.510203  | 2.118806  | 0.096914  |
| H | 5.081396  | -0.289600 | -0.179333 |
| H | -3.016889 | 3.576254  | -0.881656 |
| H | -0.684327 | 0.224192  | -1.387329 |
| O | -2.400593 | -2.769609 | 0.078218  |
| H | -0.688206 | -0.788533 | 1.480938  |

### IIb

E = -818.322330496

|   |           |           |           |
|---|-----------|-----------|-----------|
| O | 0.000223  | -1.302335 | -0.161909 |
| C | -0.935179 | -0.475217 | 0.557999  |
| C | -0.667162 | 0.970849  | 0.359120  |
| C | 0.594020  | 1.440324  | 0.176871  |
| C | 1.674225  | 0.463021  | 0.145762  |
| C | 1.307557  | -0.890994 | -0.067353 |
| C | -1.865787 | 1.651476  | -0.048489 |
| O | -2.865981 | 0.708906  | -0.209251 |
| C | -2.375897 | -0.583347 | 0.026191  |
| C | 3.032715  | 0.810348  | 0.177940  |
| C | 4.013960  | -0.160466 | 0.013070  |
| C | 3.638966  | -1.490150 | -0.211765 |
| C | 2.295330  | -1.857131 | -0.259543 |
| N | -3.142065 | -1.554277 | -0.175996 |
| C | -2.694460 | -2.910789 | 0.087793  |
| O | 0.871639  | 2.719743  | -0.096324 |
| H | -1.698477 | -2.997189 | 0.540239  |
| H | 3.298971  | 1.852034  | 0.326361  |
| H | 1.993575  | -2.884076 | -0.437088 |
| H | -2.690226 | -3.466172 | -0.857116 |
| H | 4.401314  | -2.252340 | -0.347035 |
| H | 5.063671  | 0.113420  | 0.049406  |
| H | -3.430078 | -3.394781 | 0.739922  |
| H | -0.903165 | -0.793106 | 1.612672  |
| O | -2.026310 | 2.835307  | -0.282592 |
| H | 0.012582  | 3.201647  | -0.140355 |

### IIb (H<sub>2</sub>O)

E = -894.755336781

|   |           |           |           |
|---|-----------|-----------|-----------|
| O | 0.478045  | -1.546479 | -0.265428 |
| C | -0.612247 | -0.965472 | 0.467566  |
| C | -0.798007 | 0.495837  | 0.183768  |
| C | 0.331738  | 1.277918  | 0.096063  |
| C | 1.618707  | 0.566514  | 0.112776  |
| C | 1.634581  | -0.824987 | -0.136913 |
| C | -2.181547 | 0.716581  | -0.173334 |
| O | -2.819763 | -0.510577 | -0.239126 |
| C | -1.952984 | -1.560365 | 0.045653  |
| C | 2.842682  | 1.247794  | 0.218779  |
| C | 4.047347  | 0.569327  | 0.081399  |
| C | 4.042224  | -0.804184 | -0.191947 |
| C | 2.842867  | -1.502000 | -0.307462 |
| N | -2.384930 | -2.734646 | -0.044016 |
| C | -1.530008 | -3.861594 | 0.285700  |
| O | 0.431777  | 2.581352  | -0.082485 |
| H | -0.550228 | -3.601851 | 0.705684  |
| H | 2.823436  | 2.317492  | 0.396290  |
| H | 2.820456  | -2.566814 | -0.514882 |
| H | -1.365836 | -4.453478 | -0.622267 |
| H | 4.981400  | -1.337996 | -0.308342 |
| H | 4.987337  | 1.104364  | 0.174608  |
| H | -2.066301 | -4.503894 | 0.993250  |
| H | -0.426611 | -1.171238 | 1.535100  |
| O | -2.831526 | 1.719550  | -0.422147 |
| H | -2.330820 | 3.354505  | -0.140811 |
| H | -1.920314 | 4.263214  | 1.050495  |
| O | -1.701478 | 4.067896  | 0.126390  |
| H | -0.426569 | 3.112067  | 0.009062  |

### IIc

E = -818.324599852

|   |           |           |           |
|---|-----------|-----------|-----------|
| O | -0.202887 | -1.176474 | -0.124060 |
| C | -1.066207 | -0.331294 | 0.653466  |
| C | -0.664458 | 1.141213  | 0.639542  |
| C | 0.836968  | 1.425000  | 0.672034  |
| C | 1.700378  | 0.302039  | 0.270641  |
| C | 1.143644  | -0.932679 | -0.110309 |
| C | -1.396309 | 1.686058  | -0.595456 |
| O | -2.444714 | 0.834153  | -0.874789 |
| C | -2.404588 | -0.311131 | -0.085293 |
| C | 3.097345  | 0.462533  | 0.232480  |
| C | 3.918789  | -0.574148 | -0.181641 |
| C | 3.345049  | -1.794711 | -0.569820 |
| C | 1.967467  | -1.980039 | -0.535368 |
| N | -3.377963 | -1.100560 | -0.117444 |
| C | -3.359073 | -2.332420 | 0.648088  |
| O | 1.252178  | 2.516364  | 1.018115  |



|   |           |           |           |
|---|-----------|-----------|-----------|
| H | -2.456095 | -2.502664 | 1.250873  |
| H | 3.500418  | 1.425606  | 0.529387  |
| H | 1.510679  | -2.919728 | -0.827871 |
| H | -3.466763 | -3.171335 | -0.048319 |
| H | 3.981525  | -2.611926 | -0.898029 |
| H | 4.995950  | -0.443035 | -0.211274 |
| H | -4.234516 | -2.348931 | 1.306764  |
| H | -1.144636 | -0.746322 | 1.663018  |
| O | -1.185327 | 2.676532  | -1.228495 |
| H | -1.108851 | 1.655118  | 1.501216  |

### **TSIIa-IIb**

E = -894.694684549

Freq = -1180

|   |           |           |           |
|---|-----------|-----------|-----------|
| O | 0.261317  | 1.432828  | 0.389798  |
| C | -0.707950 | 0.732542  | -0.383353 |
| C | -0.733884 | -0.748133 | -0.099926 |
| C | 0.555571  | -1.393588 | -0.293319 |
| C | 1.695430  | -0.431477 | -0.265895 |
| C | 1.509832  | 0.907116  | 0.156489  |
| C | -2.098082 | -1.163416 | -0.431903 |
| O | -2.894573 | -0.033335 | -0.506162 |
| C | -2.163161 | 1.132548  | -0.223787 |
| C | 3.005357  | -0.895232 | -0.473295 |
| C | 4.097244  | -0.059102 | -0.286576 |
| C | 3.893447  | 1.256708  | 0.151890  |
| C | 2.608836  | 1.740258  | 0.378574  |
| N | -2.799589 | 2.181565  | 0.023910  |
| C | -2.115935 | 3.442120  | 0.266338  |
| O | 0.761646  | -2.625735 | -0.253142 |
| H | -1.025737 | 3.408227  | 0.169659  |
| H | 3.132350  | -1.932073 | -0.767792 |
| H | 2.434076  | 2.757669  | 0.713164  |
| H | -2.368627 | 3.785239  | 1.276210  |
| H | 4.744322  | 1.913056  | 0.312655  |
| H | 5.103680  | -0.426085 | -0.462891 |
| H | -2.517942 | 4.185961  | -0.430940 |
| H | -0.442717 | 0.897941  | -1.444576 |
| O | -2.604120 | -2.270705 | -0.489766 |
| H | -0.892852 | -1.564478 | 1.199127  |
| O | -0.993566 | -2.682219 | 1.626755  |
| H | -1.821345 | -2.937683 | 1.146456  |
| H | -0.273937 | -3.047463 | 1.010270  |

### **TSI-IIb**

E = -818.303760609

Freq = -1212

|   |           |           |           |
|---|-----------|-----------|-----------|
| O | -0.035358 | -1.323318 | -0.093130 |
|---|-----------|-----------|-----------|

|   |           |           |           |
|---|-----------|-----------|-----------|
| C | -0.977782 | -0.502090 | 0.634132  |
| C | -0.642044 | 0.933696  | 0.543516  |
| C | 0.635514  | 1.436157  | 0.281451  |
| C | 1.690330  | 0.422358  | 0.184056  |
| C | 1.280625  | -0.920070 | -0.030043 |
| C | -1.694455 | 1.627126  | -0.037608 |
| O | -2.759277 | 0.841673  | -0.301190 |
| C | -2.393754 | -0.502303 | 0.007782  |
| C | 3.054871  | 0.739913  | 0.153265  |
| C | 4.008396  | -0.248434 | -0.059055 |
| C | 3.593324  | -1.568235 | -0.274163 |
| C | 2.241589  | -1.905219 | -0.268697 |
| N | -3.234856 | -1.395274 | -0.228512 |
| C | -2.924641 | -2.784320 | 0.064361  |
| O | 0.781531  | 2.669993  | -0.036670 |
| H | -1.948641 | -2.954430 | 0.536097  |
| H | 3.341521  | 1.777660  | 0.294084  |
| H | 1.911512  | -2.923806 | -0.444543 |
| H | -2.956650 | -3.348981 | -0.873930 |
| H | 4.331522  | -2.346498 | -0.447599 |
| H | 5.064618  | 0.001981  | -0.068525 |
| H | -3.715362 | -3.185300 | 0.707803  |
| H | -1.027404 | -0.907028 | 1.655649  |
| O | -1.626275 | 2.843266  | -0.408155 |
| H | -0.473929 | 3.028944  | -0.240285 |

### **TSI-IIb (H<sub>2</sub>O)**

E = --894.742274111

Freq = -942

|   |           |           |           |
|---|-----------|-----------|-----------|
| O | 0.432788  | -1.533541 | -0.280203 |
| C | -0.634005 | -0.925879 | 0.467451  |
| C | -0.782247 | 0.543177  | 0.204517  |
| C | 0.392614  | 1.328960  | 0.152333  |
| C | 1.647527  | 0.535862  | 0.132704  |
| C | 1.611640  | -0.847548 | -0.150576 |
| C | -2.123055 | 0.779461  | -0.157099 |
| O | -2.824711 | -0.392637 | -0.232682 |
| C | -1.993467 | -1.479191 | 0.052400  |
| C | 2.896322  | 1.169327  | 0.237105  |
| C | 4.075816  | 0.455007  | 0.071008  |
| C | 4.019079  | -0.911589 | -0.232538 |
| C | 2.794936  | -1.563217 | -0.349155 |
| N | -2.474559 | -2.632800 | -0.037822 |
| C | -1.661130 | -3.792782 | 0.284031  |
| O | 0.494845  | 2.592730  | 0.053230  |
| H | -0.670068 | -3.569629 | 0.697956  |
| H | 2.908066  | 2.236123  | 0.434017  |
| H | 2.732615  | -2.621778 | -0.579857 |
| H | -1.525289 | -4.386690 | -0.627134 |

|   |           |           |           |
|---|-----------|-----------|-----------|
| H | 4.937366  | -1.475365 | -0.373161 |
| H | 5.035243  | 0.954864  | 0.163436  |
| H | -2.217437 | -4.416329 | 0.992742  |
| H | -0.441996 | -1.152866 | 1.529567  |
| O | -2.790531 | 1.814616  | -0.424987 |
| H | -2.237417 | 2.891904  | -0.216423 |
| H | -1.809836 | 4.174300  | 0.902130  |
| O | -1.592627 | 3.854433  | 0.011167  |
| H | -0.611629 | 3.360736  | 0.056200  |

### TSIIb-IIc

E = -894.711195991

Freq = -1090

|   |           |           |           |
|---|-----------|-----------|-----------|
| O | 0.210794  | -1.500903 | -0.059550 |
| C | -0.831828 | -0.699856 | 0.555836  |
| C | -0.749102 | 0.777715  | 0.270159  |
| C | 0.592484  | 1.352501  | 0.128503  |
| C | 1.713793  | 0.407128  | 0.075647  |
| C | 1.464412  | -0.974075 | -0.062735 |
| C | -1.825127 | 1.079019  | -0.689496 |
| O | -2.611380 | -0.040312 | -0.869522 |
| C | -2.145641 | -1.106759 | -0.111636 |
| C | 3.042949  | 0.868795  | 0.055704  |
| C | 4.097938  | -0.015435 | -0.106945 |
| C | 3.830869  | -1.384132 | -0.266186 |
| C | 2.527024  | -1.865975 | -0.248313 |
| N | -2.815084 | -2.168084 | -0.093004 |
| C | -2.356622 | -3.309826 | 0.676603  |
| O | 0.806155  | 2.590276  | 0.078325  |
| H | -1.454441 | -3.142347 | 1.280236  |
| H | 3.209051  | 1.936150  | 0.157675  |
| H | 2.307677  | -2.922264 | -0.363973 |
| H | -2.152639 | -4.134963 | -0.015441 |
| H | 4.652219  | -2.083221 | -0.398954 |
| H | 5.121159  | 0.346816  | -0.119140 |
| H | -3.170588 | -3.636698 | 1.333349  |
| H | -0.825566 | -0.949275 | 1.623830  |
| O | -2.139413 | 2.137950  | -1.200999 |
| H | -1.251429 | 1.969628  | 1.144262  |
| O | -1.335429 | 3.128595  | 1.199097  |
| H | -0.396751 | 3.224279  | 0.731507  |
| H | -1.945806 | 3.269032  | 0.436017  |

### IIIa

E = -934.101259820

|   |           |           |           |
|---|-----------|-----------|-----------|
| C | 0.507421  | -0.596696 | -0.626767 |
| C | -0.807226 | -1.387660 | -0.487903 |
| C | -1.998620 | -0.582012 | -0.140956 |

|   |           |           |           |
|---|-----------|-----------|-----------|
| C | -1.883735 | 0.798407  | 0.098528  |
| C | 0.488478  | 0.622511  | 0.314028  |
| H | -3.334732 | -2.242705 | -0.296907 |
| C | -3.272000 | -1.175704 | -0.107426 |
| C | -3.019475 | 1.575375  | 0.345550  |
| C | -4.270123 | 0.966357  | 0.364684  |
| C | -4.402811 | -0.412826 | 0.144936  |
| H | -2.902034 | 2.638792  | 0.528026  |
| H | -5.151629 | 1.570746  | 0.560786  |
| H | -5.383975 | -0.876933 | 0.167814  |
| O | -0.675262 | 1.437184  | 0.081449  |
| O | -0.855152 | -2.586367 | -0.701053 |
| C | 1.703421  | -1.518100 | -0.401817 |
| O | 2.449347  | -1.896967 | -1.270799 |
| O | 1.776512  | -1.883328 | 0.892741  |
| C | 1.747950  | 1.486441  | 0.152260  |
| O | 2.850709  | 0.968733  | 0.293850  |
| N | 1.533698  | 2.791538  | -0.138145 |
| H | 0.574570  | 3.093870  | -0.232825 |
| C | 2.897464  | -2.718385 | 1.227045  |
| H | 2.871125  | -3.642439 | 0.644559  |
| H | 3.830555  | -2.186183 | 1.026045  |
| H | 2.796435  | -2.930604 | 2.291772  |
| H | 0.462894  | 0.269955  | 1.353048  |
| C | 2.618054  | 3.738945  | -0.325870 |
| H | 2.561454  | 4.551368  | 0.407728  |
| H | 3.555975  | 3.198703  | -0.191047 |
| H | 2.592551  | 4.168948  | -1.333688 |
| H | 0.568908  | -0.248241 | -1.665555 |

### IIIb1

E = -934.103022

|   |           |           |           |
|---|-----------|-----------|-----------|
| C | 0.892952  | -0.630297 | 0.201439  |
| C | -0.086708 | -1.444287 | -0.305855 |
| C | -1.489084 | -1.079273 | -0.134623 |
| C | -1.792746 | -0.014516 | 0.735234  |
| C | 0.500818  | 0.708270  | 0.771238  |
| H | -2.291921 | -2.614133 | -1.397175 |
| C | -2.538346 | -1.793031 | -0.732580 |
| C | -3.119732 | 0.309520  | 1.020956  |
| C | -4.147696 | -0.410833 | 0.415527  |
| C | -3.861930 | -1.457808 | -0.468147 |
| H | -3.326769 | 1.119030  | 1.714195  |
| H | -5.179755 | -0.149798 | 0.633216  |
| H | -4.668403 | -2.011496 | -0.938968 |
| O | -0.813936 | 0.700035  | 1.371727  |
| O | 0.151318  | -2.604770 | -0.917341 |
| C | 2.279517  | -1.037204 | 0.093836  |
| O | 2.653501  | -2.063814 | -0.491193 |

|   |           |           |           |
|---|-----------|-----------|-----------|
| O | 3.144367  | -0.215820 | 0.713838  |
| C | 0.626228  | 1.840666  | -0.286176 |
| O | 1.514988  | 1.809261  | -1.126962 |
| N | -0.271263 | 2.850105  | -0.143015 |
| H | -0.971789 | 2.747006  | 0.577323  |
| C | 4.533047  | -0.561867 | 0.594885  |
| H | 4.723132  | -1.548753 | 1.024869  |
| H | 4.835797  | -0.562635 | -0.455092 |
| H | 5.070595  | 0.209042  | 1.147472  |
| H | 1.145773  | -2.696797 | -0.954058 |
| H | 1.172849  | 0.975317  | 1.591517  |
| C | -0.289727 | 4.013759  | -1.010055 |
| H | -0.150831 | 4.936561  | -0.434552 |
| H | 0.532705  | 3.906993  | -1.718934 |
| H | -1.233986 | 4.081197  | -1.563326 |

### IIIb2

E = -934.092008

|   |           |           |           |
|---|-----------|-----------|-----------|
| C | 0.909243  | -0.582826 | 0.239924  |
| C | -0.047666 | -1.460989 | -0.336777 |
| C | -1.464346 | -1.105102 | -0.147327 |
| C | -1.798363 | -0.056300 | 0.728940  |
| C | 0.473588  | 0.740291  | 0.801896  |
| H | -2.207814 | -2.654206 | -1.415367 |
| C | -2.491676 | -1.843843 | -0.751690 |
| C | -3.137329 | 0.228632  | 1.011652  |
| C | -4.141598 | -0.515672 | 0.397967  |
| C | -3.824730 | -1.549676 | -0.492381 |
| H | -3.370175 | 1.026973  | 1.709889  |
| H | -5.181310 | -0.285321 | 0.614773  |
| H | -4.614803 | -2.122595 | -0.968254 |
| O | -0.851446 | 0.693654  | 1.375847  |
| O | 0.273691  | -2.531235 | -0.940644 |
| C | 2.249098  | -0.947905 | 0.143511  |
| O | 2.627793  | -2.038393 | -0.465804 |
| O | 3.186637  | -0.194466 | 0.703354  |
| C | 0.586256  | 1.884323  | -0.247217 |
| O | 1.524389  | 1.911880  | -1.032869 |
| N | -0.377791 | 2.836196  | -0.157200 |
| H | -1.107421 | 2.691176  | 0.525849  |
| C | 4.559779  | -0.579042 | 0.510885  |
| H | 4.746971  | -1.569662 | 0.932534  |
| H | 4.808603  | -0.579146 | -0.552896 |
| H | 5.140651  | 0.177824  | 1.037476  |
| H | 1.121214  | 1.032062  | 1.634823  |
| C | -0.415203 | 4.000856  | -1.022087 |
| H | -0.356830 | 4.927697  | -0.439121 |
| H | 0.447218  | 3.942363  | -1.687743 |
| H | -1.332237 | 4.018571  | -1.622763 |

|   |          |           |           |
|---|----------|-----------|-----------|
| H | 1.719639 | -2.467114 | -0.811644 |
|---|----------|-----------|-----------|

### IIIc

E = -934.101423987

|   |           |           |           |
|---|-----------|-----------|-----------|
| C | -0.428949 | 0.803732  | 0.858824  |
| C | 1.075238  | 1.106305  | 1.010945  |
| C | 1.972254  | 0.099706  | 0.402811  |
| C | 1.453642  | -1.085649 | -0.153380 |
| C | -0.656114 | -0.711619 | 0.890084  |
| H | 3.728268  | 1.265676  | 0.756044  |
| C | 3.354291  | 0.345820  | 0.317290  |
| C | 2.299298  | -1.989693 | -0.806190 |
| C | 3.659717  | -1.716483 | -0.888845 |
| C | 4.197180  | -0.550810 | -0.321102 |
| H | 1.874648  | -2.895816 | -1.226112 |
| H | 4.312709  | -2.423253 | -1.393842 |
| H | 5.262451  | -0.352195 | -0.387286 |
| O | 0.132057  | -1.410391 | -0.085112 |
| O | 1.473699  | 2.115362  | 1.563528  |
| C | -0.976516 | 1.442996  | -0.418698 |
| O | -1.373871 | 0.831265  | -1.387047 |
| O | -0.957680 | 2.781167  | -0.323281 |
| C | -2.141849 | -1.065772 | 0.729556  |
| O | -2.958272 | -0.505831 | 1.453677  |
| N | -2.426318 | -2.028789 | -0.176087 |
| H | -1.681147 | -2.286302 | -0.808534 |
| C | -1.448444 | 3.492728  | -1.473984 |
| H | -0.850398 | 3.251476  | -2.356537 |
| H | -2.492364 | 3.231723  | -1.665389 |
| H | -1.354597 | 4.548758  | -1.221846 |
| H | -0.352569 | -1.073128 | 1.883775  |
| C | -3.793609 | -2.396369 | -0.499369 |
| H | -3.864852 | -3.476771 | -0.659072 |
| H | -4.426867 | -2.110737 | 0.341633  |
| H | -4.148253 | -1.877246 | -1.398766 |
| H | -0.947100 | 1.257413  | 1.706788  |

### TSIIIb1-IIIb2 (H<sub>2</sub>O)

E = -1010.50487910

Freq = -600

|   |           |           |           |
|---|-----------|-----------|-----------|
| C | 0.859371  | -0.487749 | -0.372132 |
| C | -0.050131 | -1.279320 | 0.381583  |
| C | -1.484438 | -1.056154 | 0.049525  |
| C | -1.874410 | -0.114268 | -0.920995 |
| C | 0.304998  | 0.813837  | -0.867868 |
| H | -2.157095 | -2.573747 | 1.388663  |
| C | -2.476516 | -1.852858 | 0.643421  |
| C | -3.210248 | -0.000644 | -1.314900 |
| C | -4.171981 | -0.810764 | -0.717848 |

|   |           |           |           |
|---|-----------|-----------|-----------|
| C | -3.809758 | -1.734785 | 0.270663  |
| H | -3.472960 | 0.726197  | -2.077706 |
| H | -5.211505 | -0.715371 | -1.020275 |
| H | -4.565241 | -2.360356 | 0.736784  |
| O | -0.973961 | 0.726252  | -1.522399 |
| O | 0.234697  | -2.152757 | 1.258017  |
| C | 2.256542  | -0.706855 | -0.494047 |
| O | 3.008241  | -1.365622 | 0.286981  |
| O | 2.825477  | -0.120647 | -1.570951 |
| C | 0.214610  | 1.798033  | 0.345736  |
| O | 0.938997  | 1.664552  | 1.339729  |
| N | -0.660154 | 2.812790  | 0.189579  |
| H | -1.246598 | 2.777010  | -0.633905 |
| C | 4.251979  | -0.229715 | -1.687146 |
| H | 4.550277  | -1.272498 | -1.820026 |
| H | 4.748190  | 0.172873  | -0.800106 |
| H | 4.511866  | 0.355390  | -2.570272 |
| H | 0.966493  | 1.269261  | -1.606721 |
| C | -0.897769 | 3.833866  | 1.196080  |
| H | -0.163064 | 3.695059  | 1.989790  |
| H | -1.905012 | 3.744972  | 1.619527  |
| H | -0.780774 | 4.834169  | 0.765384  |
| H | 1.685001  | 0.058288  | 2.221050  |
| O | 2.012429  | -0.855189 | 2.427357  |
| H | 1.210221  | -1.477595 | 2.158435  |
| H | 2.610738  | -1.131622 | 1.500027  |

#### TSIIIb1-IIIb2

E = -934.091979038

Freq = -337

|   |           |           |           |
|---|-----------|-----------|-----------|
| C | 0.907429  | -0.575942 | 0.243110  |
| C | -0.044334 | -1.453934 | -0.327049 |
| C | -1.461590 | -1.106862 | -0.146177 |
| C | -1.800516 | -0.055217 | 0.725338  |
| C | 0.470996  | 0.746543  | 0.804463  |
| H | -2.197895 | -2.662806 | -1.411291 |
| C | -2.484849 | -1.850776 | -0.751033 |
| C | -3.140873 | 0.227162  | 1.002821  |
| C | -4.141413 | -0.522170 | 0.388807  |
| C | -3.819417 | -1.558735 | -0.496535 |
| H | -3.378008 | 1.027438  | 1.697351  |
| H | -5.182336 | -0.293578 | 0.601538  |
| H | -4.606631 | -2.135401 | -0.972565 |
| O | -0.856942 | 0.698235  | 1.372954  |
| O | 0.286630  | -2.531317 | -0.926575 |
| C | 2.249532  | -0.951042 | 0.139840  |
| O | 2.607725  | -2.040697 | -0.468105 |
| O | 3.190206  | -0.198202 | 0.696029  |
| C | 0.587160  | 1.891367  | -0.243006 |

|   |           |           |           |
|---|-----------|-----------|-----------|
| O | 1.526886  | 1.918307  | -1.026754 |
| N | -0.376324 | 2.843965  | -0.154427 |
| H | -1.107302 | 2.699279  | 0.527267  |
| C | 4.560024  | -0.595264 | 0.504558  |
| H | 4.738225  | -1.586113 | 0.929530  |
| H | 4.807799  | -0.602320 | -0.559422 |
| H | 5.148048  | 0.158438  | 1.027764  |
| H | 1.655083  | -2.466201 | -0.807383 |
| H | 1.115141  | 1.037245  | 1.640559  |
| C | -0.410340 | 4.009793  | -1.017904 |
| H | -0.345619 | 4.935859  | -0.434325 |
| H | 0.449899  | 3.947723  | -1.686056 |
| H | -1.329042 | 4.032545  | -1.615789 |

#### TSIIIa-IIIb (H<sub>2</sub>O)

E = -1010.47907208

Freq = -1105

|   |           |           |           |
|---|-----------|-----------|-----------|
| C | -1.050392 | -0.056172 | 0.148629  |
| C | -0.197948 | -1.023858 | 0.856400  |
| C | 1.175174  | -1.187734 | 0.335714  |
| C | 1.575451  | -0.538700 | -0.849209 |
| C | -0.283614 | 0.942201  | -0.679155 |
| H | 1.728367  | -2.587072 | 1.852748  |
| C | 2.059701  | -2.096843 | 0.943233  |
| C | 2.813845  | -0.831487 | -1.433178 |
| C | 3.665967  | -1.740680 | -0.816428 |
| C | 3.297807  | -2.371251 | 0.381400  |
| H | 3.088566  | -0.332358 | -2.357474 |
| H | 4.630302  | -1.956627 | -1.268835 |
| H | 3.972955  | -3.075226 | 0.858360  |
| O | 0.792749  | 0.381389  | -1.479059 |
| O | -0.572276 | -1.696370 | 1.844185  |
| C | -2.354543 | -0.521410 | -0.343738 |
| O | -3.203597 | -1.120302 | 0.326024  |
| O | -2.605985 | -0.175876 | -1.627882 |
| C | 0.256514  | 2.096330  | 0.206606  |
| O | -0.369342 | 2.464430  | 1.195768  |
| N | 1.392540  | 2.683929  | -0.243943 |
| H | 1.830853  | 2.275139  | -1.057089 |
| C | -3.920934 | -0.490877 | -2.113899 |
| H | -4.083722 | -1.571300 | -2.107922 |
| H | -4.686599 | -0.012625 | -1.497242 |
| H | -3.951645 | -0.104492 | -3.133301 |
| H | -1.662601 | -0.722909 | 2.560570  |
| H | -0.944895 | 1.399078  | -1.417205 |
| C | 2.019341  | 3.808276  | 0.426796  |
| H | 2.116081  | 4.664305  | -0.250983 |
| H | 1.382263  | 4.086902  | 1.267294  |
| H | 3.013980  | 3.541443  | 0.803335  |

|   |           |           |          |
|---|-----------|-----------|----------|
| H | -1.684219 | 0.457731  | 1.505560 |
| O | -2.269719 | 0.092550  | 2.445162 |
| H | -3.010323 | -0.342830 | 1.937166 |

### TSIIIa-IIIb

E = -934.005190559

Freq = -1714

|   |           |           |           |
|---|-----------|-----------|-----------|
| C | -0.458990 | -0.638307 | 0.247563  |
| C | 0.746507  | -1.467078 | 0.201776  |
| C | 2.011602  | -0.688971 | 0.041084  |
| C | 1.986142  | 0.708882  | -0.088049 |
| C | -0.373511 | 0.692808  | -0.472119 |
| H | 3.241553  | -2.423711 | 0.158529  |
| C | 3.250076  | -1.343106 | 0.054471  |
| C | 3.171868  | 1.440810  | -0.185052 |
| C | 4.392056  | 0.769182  | -0.162767 |
| C | 4.436855  | -0.625767 | -0.048958 |
| H | 3.120117  | 2.520985  | -0.281606 |
| H | 5.314254  | 1.338722  | -0.242732 |
| H | 5.392214  | -1.142163 | -0.037019 |
| O | 0.809005  | 1.415672  | -0.093835 |
| O | 0.752687  | -2.693896 | 0.333944  |
| C | -1.721823 | -1.393274 | 0.189467  |
| O | -2.116493 | -1.632690 | 1.380379  |
| O | -2.324604 | -1.833671 | -0.868182 |
| C | -1.601688 | 1.556977  | -0.162205 |
| O | -2.717800 | 1.035241  | -0.149820 |
| N | -1.361309 | 2.869211  | 0.042598  |
| H | -0.390533 | 3.150579  | 0.074041  |
| C | -3.612596 | -2.472811 | -0.675744 |
| H | -3.494769 | -3.358197 | -0.048875 |
| H | -4.295089 | -1.759557 | -0.209586 |
| H | -3.949010 | -2.742446 | -1.675679 |
| H | -0.343670 | 0.568291  | -1.570858 |
| C | -2.407538 | 3.825661  | 0.356965  |
| H | -2.395455 | 4.661497  | -0.351323 |
| H | -3.364279 | 3.306915  | 0.284781  |
| H | -2.290156 | 4.220803  | 1.372920  |
| H | -1.152126 | -0.941470 | 1.630756  |

### TSIIIb-IIIc (H<sub>2</sub>O)

E = -1010.47663021

Freq = -812

|   |           |           |           |
|---|-----------|-----------|-----------|
| C | 0.284318  | 0.836615  | -0.383290 |
| C | -1.113428 | 1.276005  | -0.295894 |
| C | -2.125098 | 0.210342  | -0.135884 |
| C | -1.719977 | -1.115397 | 0.137316  |
| C | 0.386974  | -0.617411 | -0.775662 |
| H | -3.783344 | 1.552371  | -0.283922 |

|   |           |           |           |
|---|-----------|-----------|-----------|
| C | -3.494345 | 0.526127  | -0.081736 |
| C | -2.664039 | -2.083622 | 0.496563  |
| C | -4.011064 | -1.742023 | 0.547063  |
| C | -4.435072 | -0.438517 | 0.248111  |
| H | -2.325403 | -3.092397 | 0.710475  |
| H | -4.741719 | -2.501489 | 0.812687  |
| H | -5.490332 | -0.185713 | 0.285088  |
| O | -0.414846 | -1.493521 | 0.068799  |
| O | -1.475685 | 2.480729  | -0.323587 |
| C | 1.208986  | 1.376735  | 0.631519  |
| O | 1.450200  | 2.574842  | 0.827205  |
| O | 1.824648  | 0.424163  | 1.356382  |
| C | 1.820021  | -1.153608 | -0.878723 |
| O | 2.669059  | -0.502753 | -1.477962 |
| N | 2.016888  | -2.386273 | -0.349750 |
| H | 1.251975  | -2.790262 | 0.171971  |
| C | 2.875609  | 0.874224  | 2.228721  |
| H | 3.648839  | 1.394099  | 1.657790  |
| H | 2.477528  | 1.545479  | 2.993202  |
| H | 3.278226  | -0.031105 | 2.683946  |
| H | -0.346989 | 3.191799  | -1.102367 |
| H | -0.037426 | -0.723090 | -1.785746 |
| C | 3.308193  | -3.045952 | -0.372630 |
| H | 3.964496  | -2.464384 | -1.021773 |
| H | 3.752883  | -3.096208 | 0.629444  |
| H | 3.217503  | -4.063779 | -0.768205 |
| H | 0.654539  | 2.048675  | -1.424535 |
| O | 0.607510  | 3.161429  | -1.526574 |
| H | 1.147456  | 3.339681  | -0.696754 |

### TSIIIb-IIIc

E = -933.999567239

Freq = -1760

|   |           |           |           |
|---|-----------|-----------|-----------|
| C | -0.375210 | -0.788291 | -0.550417 |
| C | 0.873979  | -1.473451 | -0.189128 |
| C | 2.070547  | -0.582494 | -0.103901 |
| C | 1.907456  | 0.795061  | 0.123340  |
| C | -0.309339 | 0.716134  | -0.697342 |
| H | 3.463907  | -2.192136 | -0.238068 |
| C | 3.363529  | -1.121027 | -0.091608 |
| C | 3.011272  | 1.616002  | 0.365572  |
| C | 4.288661  | 1.060136  | 0.359347  |
| C | 4.471242  | -0.308203 | 0.123137  |
| H | 2.853736  | 2.674453  | 0.548985  |
| H | 5.148621  | 1.700514  | 0.537226  |
| H | 5.470955  | -0.732619 | 0.120900  |
| O | 0.658195  | 1.363224  | 0.166470  |
| O | 0.957506  | -2.677551 | 0.063240  |
| C | -1.595778 | -1.477761 | -0.102364 |

|   |           |           |           |
|---|-----------|-----------|-----------|
| O | -1.947780 | -2.320695 | -0.992771 |
| O | -2.204225 | -1.346115 | 1.035705  |
| C | -1.672004 | 1.391190  | -0.493589 |
| O | -2.702387 | 0.825517  | -0.858870 |
| N | -1.623207 | 2.629319  | 0.045908  |
| H | -0.718908 | 2.948296  | 0.366783  |
| C | -3.450323 | -2.071003 | 1.202450  |
| H | -4.153079 | -1.752753 | 0.430000  |
| H | -3.264427 | -3.143966 | 1.132211  |
| H | -3.807481 | -1.799257 | 2.194674  |
| H | 0.009153  | 0.954882  | -1.724519 |
| C | -2.809457 | 3.425629  | 0.302062  |
| H | -2.732593 | 4.404758  | -0.183684 |
| H | -3.665351 | 2.888101  | -0.108139 |
| H | -2.961433 | 3.575636  | 1.377599  |
| H | -1.018576 | -1.777722 | -1.570869 |

Table S5. B3LYP/6-31G(d) optimized geometries of the species involved in the reaction mechanisms found for the reaction. Only the most relevant distances in angstroms are displayed.

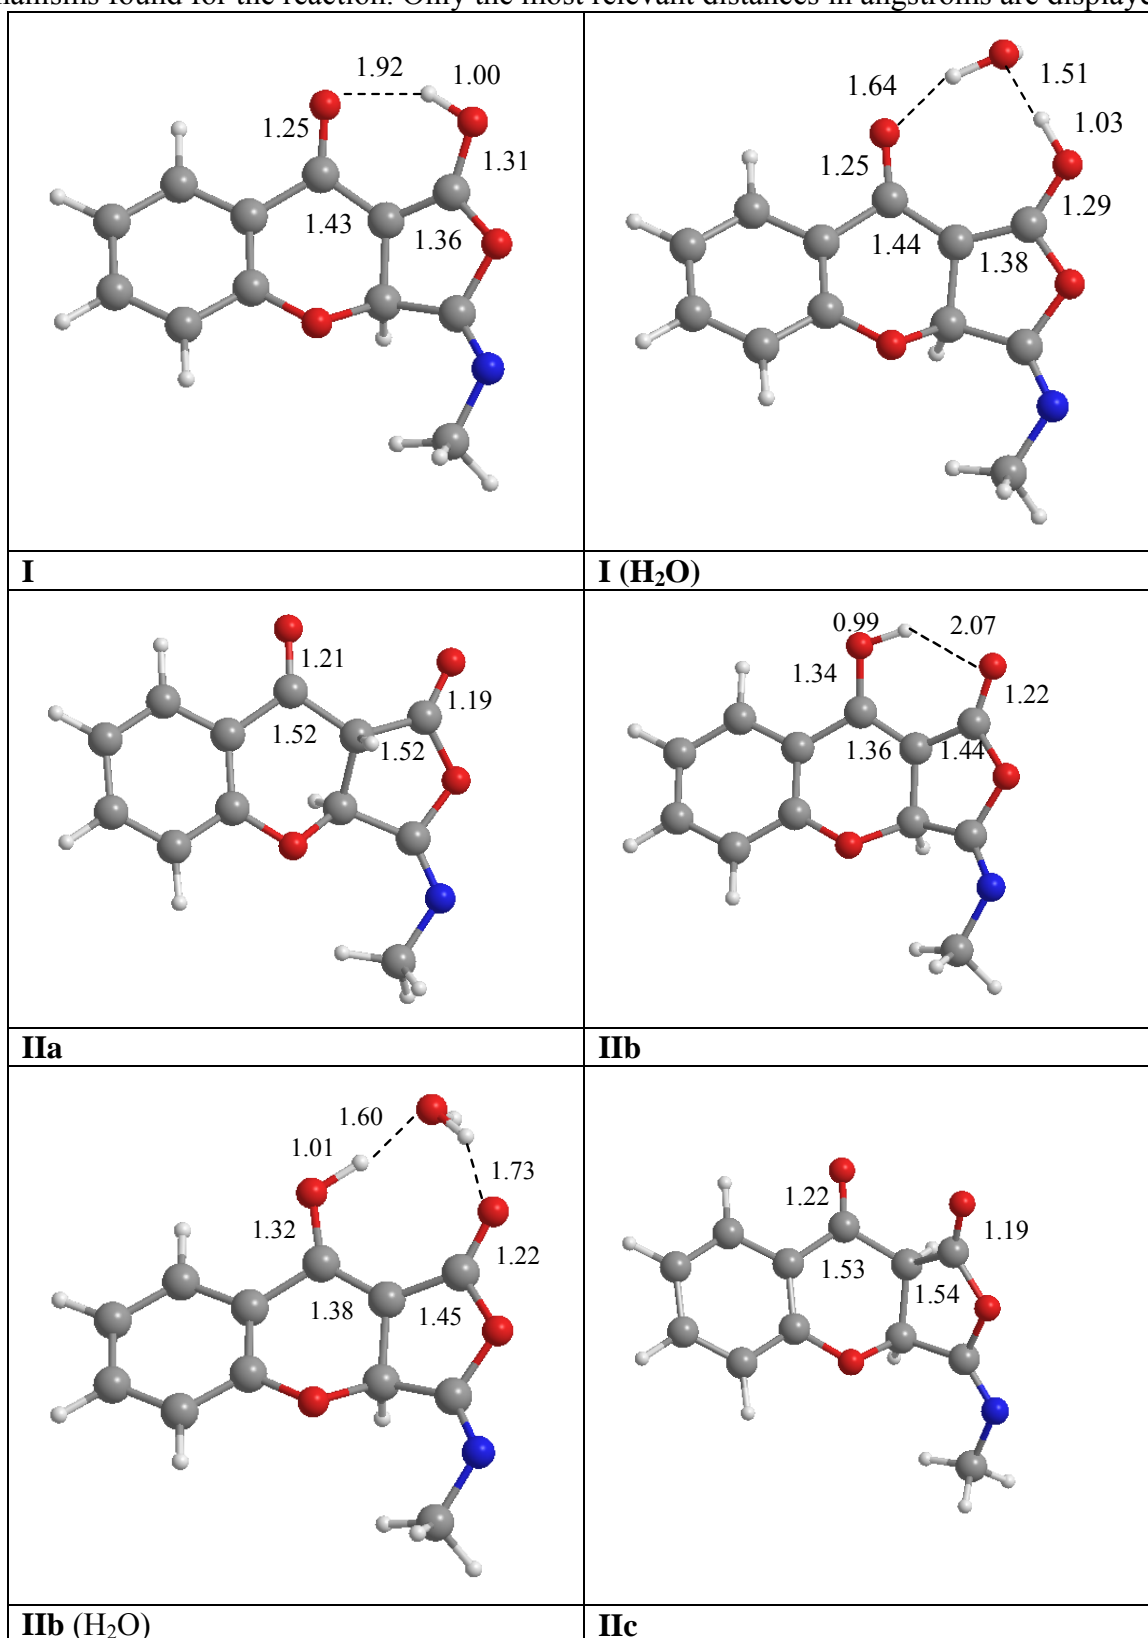



Table S3 (cont.)

|                                                                                                                                       |                                                                                                                  |
|---------------------------------------------------------------------------------------------------------------------------------------|------------------------------------------------------------------------------------------------------------------|
| <p>Ball-and-stick model of transition state TSIIa-IIb. Bond lengths (Å): 1.25, 1.46, 1.46, 1.54, 1.20, 1.22.</p>                      | <p>Ball-and-stick model of transition state TSI-IIb. Bond lengths (Å): 1.28, 1.40, 1.39, 1.32, 1.18, 1.27.</p>   |
| <p><b>TSIIa-IIb</b></p>                                                                                                               | <p><b>TSI-IIb</b></p>                                                                                            |
| <p>Ball-and-stick model of transition state TSI-IIb (H<sub>2</sub>O). Bond lengths (Å): 1.27, 1.41, 1.41, 1.23, 1.10, 1.18, 1.35.</p> | <p>Ball-and-stick model of transition state TSIIb-IIc. Bond lengths (Å): 1.26, 1.47, 1.47, 1.56, 1.16, 1.22.</p> |
| <p><b>TSI-IIb (H<sub>2</sub>O)</b></p>                                                                                                | <p><b>TSIIb-IIc</b></p>                                                                                          |
| <p>Ball-and-stick model of product IIIa. Bond lengths (Å): 1.22, 1.54, 1.53, 1.21.</p>                                                | <p>Ball-and-stick model of product IIIb1. Bond lengths (Å): 1.33, 1.37, 1.45, 1.00, 1.70, 1.24.</p>              |
| <p><b>IIIa</b></p>                                                                                                                    | <p><b>IIIb1</b></p>                                                                                              |



Table S3 (cont.)

|                                              |                             |
|----------------------------------------------|-----------------------------|
|                                              |                             |
| <p><b>IIIb2</b></p>                          | <p><b>IIIc</b></p>          |
|                                              |                             |
| <p><b>TSIIIb1-IIIb2 (H<sub>2</sub>O)</b></p> | <p><b>TSIIIb1-IIIb2</b></p> |
|                                              |                             |
| <p><b>TSIIIa-IIIb (H<sub>2</sub>O)</b></p>   | <p><b>TSIIIa-IIIb</b></p>   |

Table S3 (cont.)

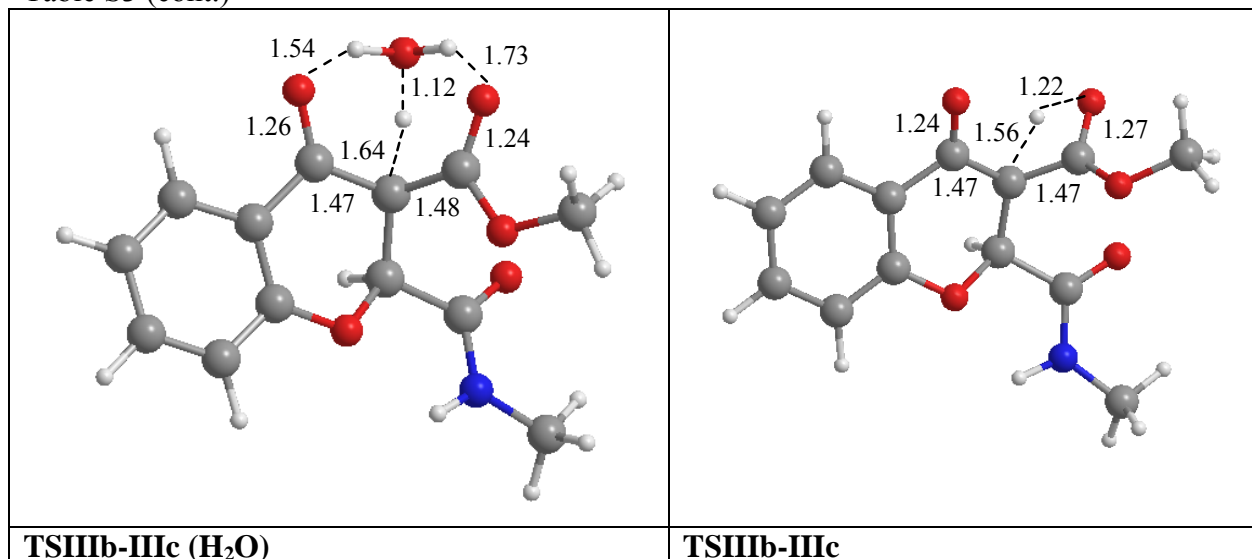

Supplement: c2ob07011a.pdf [file c2ob07011a.pdf]
